# Supplementary material for: Genome-Wide Analysis of MYB Genes in Primulina eburnea (Hance) and Identification of Members in Response to Drought Stress
Source: Int J Mol Sci. 2023 Dec 29;25(1):465. doi: 10.3390/ijms25010465 (PMC10778706; doi:10.3390/ijms25010465)
Supplement: Supplementary file 1 [file ijms-25-00465-s001.zip › 20231026SI -ijms_type.xlsx]

## Sheet: Table S1
Primers used in this study
primer ID	forward sequence (5' to 3')	reverse sequence (5' to 3')
PebGAPDH	AAGAACCCTGAGGAGAT	GAGCGGAAATAACAACT
PebMYB5	GAGATCGGTGCCTACCA	AGCAGCCCATTTGTTCC
PebMYB57	GTTGCAGGCTTAGGTGG	CGTTATCCGTTCTTTGAG
PebMYB46	CCTGTTGGTGGAGTGA	GATGTGGAGGATAAGCA
PebMYB13	TAATCCACGATCAAACTG	ATTACTGTAGGAACCGTCT
PebMYB4	GTTGTAGACTGAGGTGGCT	CTGTTCTTCCGGGTAATT
PebMYB23	TGGCATTTAGTTCCTCT	AATCAACGACCATCTGT
PebMYB38	GGGGTAAAGTAAGTGAAATAGG	CGATGAAGGCGGTGGAGT
PebMYB49	TCCTTCTCGGTCCAACTA	TTCTGAAATCCCAACTGC
PebMYB54	AAAGGATTCGGGAACTCA	AGGAACCTGCTCCAAAGA
PebMYB68	GAATCCCTACTCTTGAACC	AAGGAACCTACTTGACCC
PebMYB76	GAGGAGGCTTCAAACAG	CGATGGACAGAGGCTTA
PebMYB16	TCTTCTCCGCTTCATCGT	CCTCTGGCCGTCAAATAC
PebMYB32	GGACCTTGGACTCCTGAA	CCTGAGCCTGCAACTCTT
PebMYB85	ACCCTTCTGCTGCCTCTG	CCACGCCAATCACCTTTA
PebMYB3	GTCCCTTATCAGCAAATCC	CCACCCTCATCGCACTT
PebMYB17	AATGAATGGCAGGATAACA	ACAGAACGGACTGGAAACC
PebMYB51	ATTACTGGAGAACAAGGGTC	ATTGGCGTAGGAGGAAGC
PebMYB142	ACAATAATAGCCACAGGG	GATGCGATAATAGTCCAA
PebMYB69	GTTGAGATGTGGGAAGAGTT	ACCGAGCATTTCATGTAAGT
PebMYB95	AAAATCTATGCCAAACGAAG	GGTAAGTGTATGTTAGAGGGTG
PebMYB24	ATCTAGTTCCAGCCCGAGTG	CAAATCAGCAGCTTCCCTTA

## Sheet: Table S2
The details of identified PebMYB genes
Gene ID	Chromosome	Start	End	NO. of domain	type	Domain range(AA)	NO. of Amino Acid	Molecular Weight	Theoretical pI	Instability Index	Aliphatic Index	Grand Average of Hydropathicity
PebMYB156	Chr3	7240534	7242158	1	1	97-151	260	28324.8	8.79	53.85	71.62	-0.493
PebMYB157	Chr15	27071763	27075165	1	1	100-154	339	36642.9	6.89	52.32	60.15	-0.558
PebMYB158	Chr2	42597973	42605144	1	1	3-59	279	30121.4	7.17	55.05	69.5	-0.652
PebMYB159	Chr2	43836665	43840779	1	1	19-71	230	26423.3	9.69	49.32	65.7	-0.789
PebMYB160	Chr2	46498972	46501352	1	1	5-61	144	16231.2	8.74	62.57	65.07	-0.662
PebMYB161	Chr2	46785558	46789579	1	1	4-59	301	33086	9.6	47.83	74.78	-0.598
PebMYB162	Chr3	2434184	2437403	1	1	83-137	324	35454.6	6.8	54.51	66.76	-0.544
PebMYB163	Chr3	924726	927503	1	1	184-237	432	46143.5	4.61	48.61	73.54	-0.598
PebMYB164	Chr3	7105625	7110176	1	1	4-59	278	30757.8	6.98	41.48	76.58	-0.579
PebMYB165	Chr3	11921167	11925200	1	1	4-59	340	37630.6	6.87	42.18	76.21	-0.506
PebMYB166	ChrUN	1923977	1928100	1	1	4-59	293	31801.9	5.9	34.29	77.44	-0.52
PebMYB167	ChrUN	2786373	2790455	1	1	74-126	340	37549.4	8.45	51.53	65.35	-0.559
PebMYB168	Chr4	3349057	3351387	1	1	82-136	308	33582	9.83	76.62	72.5	-0.553
PebMYB169	Chr4	10964560	10967470	1	1	379-442	442	49878.3	6.36	66.59	58.26	-1.005
PebMYB170	Chr4	37810762	37821716	1	1	197-252	598	63310.1	5.14	48.5	70.89	-0.561
PebMYB171	Chr4	42529642	42535272	1	1	489-548	601	66219.8	6.21	47.2	78.44	-0.555
PebMYB172	Chr4	44032266	44035471	1	1	45-96	444	49665.8	8.29	51.62	65.02	-0.678
PebMYB173	Chr5	2060542	2063181	1	1	94-148	336	36307.4	6.37	60.17	59.79	-0.592
PebMYB174	Chr5	4061317	4065279	1	1	30-82	280	30696.6	8.46	36.45	69.61	-0.591
PebMYB175	Chr5	5759372	5760478	1	1	6-61	95	11085.4	9.17	55.24	59.58	-1.087
PebMYB176	Chr1	3339030	3341503	1	1	51-103	422	46888.7	7.57	46.54	63.08	-0.743
PebMYB177	Chr6	9880206	9882299	1	1	78-132	254	28401.2	9.48	61.61	82.87	-0.532
PebMYB178	Chr6	33384293	33385566	1	1	64-97	132	14762.4	10.14	59.24	45.83	-1.215
PebMYB179	Chr7	1985014	1988748	1	1	58-110	444	48832.9	7.54	52.3	62.64	-0.696
PebMYB180	Chr8	2650148	2651934	1	1	58-110	126	14433.2	9.76	52.45	54.21	-1.027
PebMYB181	Chr8	30389422	30394445	1	1	570-627	674	75209.7	9.29	56.02	76.5	-0.631
PebMYB182	Chr8	31715942	31717174	1	1	166-223	223	25378.6	8.77	50.26	75.52	-0.783
PebMYB183	Chr9	28865126	28871361	1	1	19-71	143	16500	9.46	50.35	75.66	-0.776
PebMYB184	Chr9	33577267	33581294	1	1	4-59	301	33066.8	9.58	49.52	75.48	-0.623
PebMYB185	Chr10	22712646	22715119	1	1	97-151	311	33664.9	7.02	56.22	69.2	-0.477
PebMYB186	Chr10	22542151	22544465	1	1	55-107	302	34076.9	5.06	54.86	69.14	-0.638
PebMYB187	Chr10	32677077	32680855	1	1	663-724	740	83134.6	5.73	50.26	68.88	-0.795
PebMYB188	Chr10	32754738	32759190	1	1	269-322	507	56703.6	4.81	47.73	62.47	-0.67
PebMYB189	Chr12	1547480	1548472	1	1	6-62	99	11415.7	8.96	73.27	58.18	-1.013
PebMYB190	Chr1	59809219	59814497	1	1	570-627	682	76310.1	9.34	52.69	72.17	-0.701
PebMYB191	Chr1	59885158	59890445	1	1	570-627	682	76315	9.27	51.49	72.17	-0.699
PebMYB192	Chr1	65465343	65465894	1	1	29-56	183	20633.9	4.18	47.28	55.46	-0.974
PebMYB193	Chr1	65584740	65587864	1	1	57-109	467	52172.2	5.9	51.73	64	-0.765
PebMYB194	Chr12	37097975	37104014	1	1	573-630	685	76965.3	9.21	45.5	73.71	-0.644
PebMYB195	Chr13	1406749	1407815	1	1	10-62	93	10625	9.62	38.26	53.44	-0.841
PebMYB196	Chr2	3361887	3366774	1	1	551-608	666	73977.8	9.2	47.96	76.79	-0.575
PebMYB197	Chr13	29211277	29216438	1	1	570-627	678	76076.2	9.43	55.79	73.48	-0.643
PebMYB198	Chr13	29999290	30001746	1	1	4-59	302	33785.8	8.63	55.3	63.94	-0.69
PebMYB199	Chr13	30864081	30868655	1	1	697-742	746	83540.9	5.91	50.72	71.64	-0.651
PebMYB200	Chr13	32235122	32237949	1	1	62-114	325	36388.3	9.38	50.34	67.2	-0.546
PebMYB201	Chr13	30499462	30501602	1	1	83-137	276	30408.3	8.89	72.1	73.12	-0.532
PebMYB202	Chr13	35209302	35212229	1	1	323-350	474	53445.5	4.6	46.39	58.76	-0.742
PebMYB203	Chr14	2978541	2982953	1	1	4-59	302	32762.2	9.54	40.07	75.86	-0.536
PebMYB204	Chr14	4709779	4710006	1	1	1-58	75	8694.85	9.42	64.71	59.87	-0.885
PebMYB205	Chr14	4725004	4726614	1	1	6-58	93	10839.2	9.05	56.69	52.47	-1.022
PebMYB206	Chr2	15285643	15288365	1	1	125-179	324	35832.1	8.83	55.75	65.99	-0.598
PebMYB207	Chr14	24193647	24197253	1	1	103-157	344	37157.5	8.23	49.4	59.53	-0.551
PebMYB208	Chr15	2144365	2146321	1	1	4-59	161	17848.5	9.71	41.84	83.6	-0.465
PebMYB209	Chr15	3497889	3499412	1	1	6-58	94	10932.2	9.1	60.82	51.91	-0.984
PebMYB210	Chr16	784963	785741	1	1	1-51	88	10215.4	9.34	63.21	72.16	-1.045
PebMYB211	Chr16	27809729	27813309	1	1	55-103	309	34326.4	6.12	51.8	70.45	-0.565
PebMYB212	Chr17	3838601	3839631	1	1	99-153	235	25714.9	9.4	48.38	65.11	-0.596
PebMYB213	Chr17	491503	491863	1	1	5-61	81	9085.11	8.96	51.64	53.09	-0.821
PebMYB214	Chr17	4412270	4413289	1	1	99-153	235	25789	9.46	45.83	65.11	-0.612
PebMYB215	Chr17	4756888	4761530	1	1	4-59	278	30854	6.98	46.54	76.22	-0.566
PebMYB216	Chr17	12095116	12099961	1	1	458-511	597	66808.4	6.09	50.01	69.65	-0.623
PebMYB217	Chr1	11671161	11672714	1	1	6-62	92	10494.9	9.63	36.43	55.11	-0.733
PebMYB218	Chr1	11708137	11708870	1	1	3-60	75	8645.75	8.11	83.5	57.33	-0.787
PebMYB219	Chr18	29515522	29517149	1	1	88-142	295	31803.9	6.92	62.22	74.61	-0.415
PebMYB220	Chr18	29555725	29557819	1	1	45-97	296	33686.2	5.02	52.82	62.6	-0.753
PebMYB221	Chr18	32037474	32039610	1	1	88-142	301	32376.4	6.31	58.17	72.82	-0.407
PebMYB222	Chr18	30223504	30232058	1	1	526-579	762	85764.6	5.06	48.6	79.03	-0.462
PebMYB1	Chr5	8640168	8641593	2	2	19-73，76-124	327	36869.8	5.85	51.98	67.43	-0.677
PebMYB2	Chr2	39191637	39193261	2	2	17-71，74-122	266	30379	5.37	48.08	79.21	-0.765
PebMYB3	Chr2	44920984	44922648	2	2	9-62，65-113	349	38384.4	9.27	59.61	72.66	-0.621
PebMYB4	Chr8	41146087	41147578	2	2	9-64,67-115	319	35380.3	6	42.68	70.69	-0.624
PebMYB5	Chr3	9827588	9829912	2	2	38-94，97-145	399	45786.3	9.25	62.36	71.73	-0.839
PebMYB6	Chr10	622349	623717	2	2	9-63,66-114	244	27700	5.79	41.11	66.8	-0.705
PebMYB7	Chr3	16780034	16780947	2	2	9-63,66-114	232	26380	8.98	58.79	82.46	-0.722
PebMYB8	Chr11	42744538	42748415	2	2	11-65,68-116	198	22710.7	7.1	47.09	66.06	-0.767
PebMYB9	Chr8	45136868	45137907	2	2	12-66,69-117	212	23817.1	7.63	47.12	71.79	-0.509
PebMYB10	Chr13	9967879	9973284	2	2	37-88,91-139	543	59547.3	5.31	56.74	63.61	-0.547
PebMYB11	Chr2	45961149	45962357	2	2	9-63,66-114	321	35907.7	5.66	54.87	81.78	-0.44
PebMYB12	Chr3	13790229	13791540	2	2	12-66,70-118	314	35899.4	6.27	68.18	63.63	-0.697
PebMYB13	Chr14	25620619	25622263	2	2	9-63,66-114	400	45250.4	7.17	48.46	66.8	-0.717
PebMYB14	Chr3	13243559	13246384	2	2	9-65,66-116	295	32928.9	6.76	53.88	69.15	-0.644
PebMYB15	Chr3	32773059	32774367	2	2	21-75,78-126	329	37144.2	6.06	51.25	64.07	-0.714
PebMYB16	Chr3	5610152	5611957	2	2	23-72,75-123	318	36464.9	9.54	51.08	63.21	-0.866
PebMYB17	Chr14	32050901	32052417	2	2	9-63,66-114	368	41846.6	5.29	55.14	69.7	-0.667
PebMYB18	Chr10	19622143	19623668	2	2	9-63,66-114	322	37218.2	6.09	51.28	72.05	-0.622
PebMYB19	Chr8	33162501	33164343	2	2	9-64,67-115	355	39856.4	5.47	49.31	66.82	-0.712
PebMYB20	Chr7	10821811	10823775	2	2	2-74,77-125	267	31239	6.55	52.73	68.69	-0.915
PebMYB21	Chr7	2345807	2347463	2	2	20-74,77-125	451	50201.5	5.67	52.1	70.51	-0.687
PebMYB22	ChrUN	3194221	3195603	2	2	13-67,71-119	320	36548.2	6.73	76.68	64.84	-0.666
PebMYB23	Chr2	11356543	11358261	2	2	15-69,72-120	214	24229.8	9.53	49.15	84.77	-0.648
PebMYB24	Chr18	29964676	29966774	2	2	9-63,66-114	326	36520.9	6.35	48.38	70.37	-0.687
PebMYB25	Chr1	57498618	57500264	2	2	9-63,66-144	294	33244	5.75	50.4	63.71	-0.959
PebMYB26	Chr1	58971034	58972434	2	2	24-79,82-130	324	36466.1	9.09	50.39	68.61	-0.655
PebMYB27	Chr1	56502925	56505279	2	2	59-113,116-164	398	44608.3	6.18	56.52	81.61	-0.402
PebMYB28	Chr1	57890431	57894583	2	2	30-84,87-135	500	55642.4	5.15	55.68	65.22	-0.688
PebMYB29	Chr10	38385705	38387620	2	2	14-68,71-119	390	43625.1	5.37	65.49	67.54	-0.417
PebMYB30	Chr4	1752659	1753875	2	2	20-74,77-125	279	32001.5	6.26	56.72	64.98	-0.807
PebMYB31	Chr8	3201524	3203245	2	2	20-72,73-127	452	50059.7	5.36	47.74	70.15	-0.633
PebMYB32	ChrUN	39928	42017	2	2	9-63,66-114	326	36542.9	6.35	48.57	69.17	-0.708
PebMYB33	Chr18	25764660	25766603	2	2	105-154,157-205	382	42550.3	6.2	53.66	55.71	-0.7
PebMYB34	Chr6	35506034	35508299	2	2	11-63,64-118	324	36341.4	5.31	56.04	69.2	-0.819
PebMYB35	Chr6	34701816	34704976	2	2	9-63,66.114	258	29308.4	6.09	45.71	70.7	-0.671
PebMYB36	Chr13	28289875	28291497	2	2	9-64,67-115	309	34787.2	6.65	46.08	75.11	-0.554
PebMYB37	Chr4	2788829	2790418	2	2	9-63,66-114	352	39602.7	8.53	43.31	66.02	-0.687
PebMYB38	Chr1	1027669	1029683	2	2	9-63,66-114	378	41739.5	7.13	50.81	65.08	-0.671
PebMYB39	Chr4	2795772	2797347	2	2	11-65,68-116	320	36141.8	9.19	40.07	75.91	-0.634
PebMYB40	Chr3	11196339	11198029	2	2	9-63,66-114	259	29410.3	5.81	56.49	76.06	-0.642
PebMYB41	Chr3	12712797	12715038	2	2	10-64，67-115	201	23422.1	6.31	47.73	59.65	-0.919
PebMYB42	Chr11	42312636	42314026	2	2	9-63,66-114	217	24723.2	9.92	53.23	69.77	-0.793
PebMYB43	Chr11	39772469	39773925	2	2	8-62,65-113	327	37015.1	6.61	59.23	63.58	-0.757
PebMYB44	Chr11	40919003	40920421	2	2	9-64,67-115	332	37847.8	6.47	51.55	74.34	-0.697
PebMYB45	Chr11	39083002	39084205	2	2	9-63,66-114	292	33402.1	9.37	49	72.5	-0.598
PebMYB46	Chr1	389273	390357	2	2	9-63，66-114	285	32828.3	6.66	49.7	67.05	-0.677
PebMYB47	Chr15	30057907	30059335	2	2	9-63,66-114	401	45578.7	7.65	53.72	64.69	-0.85
PebMYB48	Chr16	595544	596055	2	2	28-81,84-132	162	18645	9.36	61.1	64.44	-0.901
PebMYB49	Chr16	1882969	1884302	2	2	9-63,66-114	282	31371.4	8.6	58.21	67.91	-0.62
PebMYB50	Chr12	31333886	31334777	2	2	86-135,138-186	265	30294	6.67	50.22	60.04	-0.787
PebMYB51	Chr15	8713569	8715283	2	2	17-71,74-122	307	34942.5	5.2	62.28	65.44	-0.747
PebMYB52	Chr6	4422011	4423327	2	2	71-124,127-175	253	28426.8	8.93	61.18	53.68	-0.801
PebMYB53	Chr9	32441306	32442482	2	2	9-63,66-114	319	35575.3	5.4	53.63	82.95	-0.417
PebMYB54	Chr9	29357934	29360192	2	2	9-63,66-114	365	39977.7	5.97	51.7	76.77	-0.534
PebMYB55	Chr2	44117724	44118711	2	2	9-63,66-114	227	25608.1	9.47	46.46	70.53	-0.704
PebMYB56	Chr9	32741419	32742866	2	2	9-63,66-114	261	29105.9	8.64	55.95	72.53	-0.641
PebMYB57	Chr10	7219924	7221677	2	2	9-63,66-114	326	36878.5	6.39	46.05	67.36	-0.667
PebMYB58	Chr10	7725174	7727116	2	2	9-64,67-115	348	39064.5	6.4	50.57	68.45	-0.715
PebMYB59	Chr13	26033460	26034846	2	2	12-66,69-117	334	37551.7	5.77	43.59	70.33	-0.634
PebMYB60	Chr4	29608394	29609931	2	2	9-64,67-115	333	37617.6	7.95	52.37	73.3	-0.593
PebMYB61	Chr3	10025099	10027265	2	2	34-87,90-128	341	37877.3	5.32	44.72	71.76	-0.612
PebMYB62	Chr3	9822776	9827116	2	2	32-85,88-136	486	54733.3	6.51	49.47	68.44	-0.725
PebMYB63	Chr4	36580889	36584015	2	2	34-88,91-139	542	60758.7	4.96	53.78	64.82	-0.562
PebMYB64	Chr4	41011926	41014112	2	2	11-65,68-116	272	30513.1	6.33	55.1	66.29	-0.851
PebMYB65	Chr4	39954102	39956387	2	2	9-63,66-114	291	32897.1	4.95	57.51	68.04	-0.673
PebMYB66	Chr15	36450486	36451151	2	2	9-63,66-114	163	18885.6	9.37	43.8	78.4	-0.618
PebMYB67	Chr15	32916834	32917813	2	2	11-65,68-116	226	26343.6	6.61	54.7	68.14	-0.902
PebMYB68	Chr15	31414973	31417560	2	2	9-63,66-114	304	34249.7	6.76	51.1	76.05	-0.633
PebMYB69	Chr15	33110551	33113062	2	2	9-63,66-114	238	27191.6	5.11	66.52	70.88	-0.696
PebMYB70	ChrUN	258236	259959	2	2	15-69，72-120	214	24230.8	9.45	51.21	84.77	-0.648
PebMYB71	Chr14	28437268	28439916	2	2	9-63,66-114	245	28146.7	8.15	63.9	67.63	-0.863
PebMYB72	Chr1	2532404	2533593	2	2	8-62,65-113	315	35591.8	6.48	62.51	67.59	-0.597
PebMYB73	Chr1	1642433	1643814	2	2	9-64,67-115	330	37624.4	7.5	50.18	71.24	-0.774
PebMYB74	Chr1	3144449	3146356	2	2	9-63,66-114	277	31352.6	5.32	56.78	82.06	-0.525
PebMYB75	Chr10	18536413	18537622	2	2	9-63,66 -114	322	37195.1	6.09	53.84	72.36	-0.591
PebMYB76	Chr10	25871843	25873630	2	2	9-63,66-114	341	38075.5	6.62	43.79	68.45	-0.673
PebMYB77	Chr4	33170606	33172642	2	2	3-57,60-108	245	28246	8.95	65.03	65.22	-0.764
PebMYB78	ChrUN	48165	49276	2	2	9-63,66-114	303	34299.9	7.65	47.46	73.04	-0.518
PebMYB79	Chr6	3841589	3843236	2	2	10-60，67-115	306	34551	9.33	42.54	78.07	-0.67
PebMYB80	Chr5	4443224	4444330	2	2	9-63，66-114	259	28755.2	8.64	52.96	71.62	-0.656
PebMYB81	Chr17	869709	872007	2	2	9-63,66-114	194	22361.3	8.76	57.86	70.46	-0.926
PebMYB82	Chr4	41676917	41678257	2	2	15-65,68-116	340	38499.2	5.35	49.48	70.53	-0.556
PebMYB83	Chr13	26996000	26998016	2	2	13-67,70-118	328	37067.7	5.49	41.93	68.9	-0.636
PebMYB84	Chr13	27311931	27314248	2	2	30-84,87-135	527	58755.5	5.33	50.52	69.41	-0.525
PebMYB85	Chr5	6462329	6464102	2	2	10-63,66-114	295	32670.3	9.15	60.37	66.44	-0.589
PebMYB86	Chr15	27490530	27493580	2	2	9-63,66-114	320	36525.2	7.11	51.94	68.59	-0.653
PebMYB87	Chr3	13374064	13376905	2	2	9-63，66-114	299	33549.5	6.76	54.78	67.89	-0.691
PebMYB88	Chr15	4084523	4085914	2	2	9-63,66-114	247	27661.6	8.93	41.64	81.82	-0.565
PebMYB89	ChrUN	150790	154656	2	2	11-65,68-116	198	22710.7	7.1	47.09	66.06	-0.767
PebMYB90	Chr12	2932515	2934112	2	2	9-63,66-114	274	30723.6	8.73	57.6	67.37	-0.67
PebMYB91	Chr12	2337500	2339473	2	2	13-66,69-117	291	33253.1	10.12	49.15	64.36	-0.91
PebMYB92	Chr13	8372233	8374030	2	2	9-63,66-114	416	47132.2	6.97	55.77	58.17	-0.779
PebMYB93	Chr5	4223370	4225158	2	2	119-171,216-270	398	45248.8	6.53	47.67	68.09	-0.563
PebMYB94	Chr10	3492699	3494255	2	2	9-64,67-115	314	35194.2	5.26	41.44	75.19	-0.588
PebMYB95	Chr9	14200927	14202586	2	2	4-53,56-104	195	22925	9.88	61.95	66.1	-0.846
PebMYB96	Chr6	27952741	27954673	2	2	3-59，62-110	246	28260.9	7.64	50.42	58.21	-0.764
PebMYB97	Chr18	28668216	28669692	2	2	9-63,66-114	323	36895.7	5.93	54.95	70.31	-0.591
PebMYB98	Chr6	29489468	29493690	2	2	34-88,91-139	547	60852.7	4.92	55.18	61.61	-0.583
PebMYB99	Chr12	1183128	1184296	2	2	32-85,88-136	228	25885.9	8.7	51.9	51.8	-0.904
PebMYB100	Chr1	6321924	6323294	2	2	33-86，129-183	257	29515.6	8.87	54.2	72.41	-0.612
PebMYB101	Chr6	31546611	31547881	2	2	22-76,79-127	287	32679	7.03	56.25	76.72	-0.515
PebMYB102	Chr7	1114379	1115821	2	2	6-60,63-111	230	26086.7	9.51	37.4	74.17	-0.616
PebMYB103	Chr7	402062	403349	2	2	48-102, 105-153	337	38403.1	6.89	46.39	68.61	-0.626
PebMYB104	Chr7	5407889	5409122	2	2	9-63,66-114	322	36104.6	6.6	44.57	71.83	-0.693
PebMYB105	Chr7	5500045	5503757	2	2	12-64,100-150	224	25054.1	5.44	42.53	64.06	-0.786
PebMYB106	Chr1	7988365	7989992	2	2	11-63,64-118	281	32586	5.83	49.19	72.17	-0.709
PebMYB107	Chr8	1576902	1578685	2	2	7-61，64-112	223	24910.5	9.64	44.45	72.11	-0.626
PebMYB108	Chr8	676941	678534	2	2	9-63,66-114	305	34202.2	7.61	44.11	62.39	-0.734
PebMYB109	Chr8	15173184	15174370	2	2	9-63，66-114	322	36123.4	6.31	45.08	70	-0.738
PebMYB110	Chr8	17832907	17834339	2	2	12-64,100-150	180	20561.1	6.97	40.52	65.56	-0.803
PebMYB111	Chr8	42095758	42097289	2	2	26-78,120-174	279	31374.3	8.85	48.6	67.46	-0.655
PebMYB112	Chr8	43648710	43650160	2	2	9-63,66-114	267	29612.9	9.71	54.95	77.53	-0.666
PebMYB113	Chr8	44488529	44489742	2	2	9-63,66-114	234	26549.5	4.98	51.96	62.56	-0.746
PebMYB114	Chr9	1865917	1867536	2	2	11-65,68-116	284	32810.9	5.84	48.97	68.66	-0.731
PebMYB115	Chr9	4727533	4729040	2	2	10-64,67-115	426	47969.1	5.88	63.39	69.81	-0.485
PebMYB116	Chr9	26195690	26201011	2	2	3-59,114-168	281	30190.4	7.11	49.38	69	-0.604
PebMYB117	Chr9	30814688	30815763	2	2	9-62,65-113	343	38297.4	8.74	63.35	73.91	-0.598
PebMYB118	Chr9	31301528	31308266	2	2	6-60,63-111	258	29745.3	7.02	49.14	71.05	-0.979
PebMYB119	Chr11	2072042	2073783	2	2	30-86,137-191	305	34430.8	6.8	43.21	67.44	-0.585
PebMYB120	Chr11	3698846	3702253	2	2	2-55,58-105	868	98753.6	5.69	55.61	74.95	-0.926
PebMYB121	Chr11	37848783	37849908	2	2	4-60,138-192	309	34460.6	8.91	60	58.74	-0.792
PebMYB122	Chr11	39133282	39134725	2	2	58-107,110-158	310	34452.8	8.93	41.99	75.26	-0.589
PebMYB123	Chr11	40419090	40420790	2	2	1-55,58-106	388	43985.1	9.09	61.74	69.95	-0.81
PebMYB124	Chr11	40669687	40671903	2	2	8-62,66-114	163	18911.5	9.38	52.39	60.98	-1.022
PebMYB125	Chr11	43015211	43016300	2	2	9-63,66-114	287	33002.3	5.8	53.64	66.93	-0.676
PebMYB126	Chr12	761838	763843	2	2	115-168,171-219	409	46195.3	5.57	42.32	62.96	-0.75
PebMYB127	Chr12	3783784	3785567	2	2	8-60,109-163	212	24633.7	7.81	53.9	75.38	-0.692
PebMYB128	Chr12	3787224	3789475	2	2	11-63,112-166	215	24429.1	6.66	54.21	66.23	-0.832
PebMYB129	Chr12	5353810	5355069	2	2	9-63,66-114	276	30673.1	8.98	42.13	78.84	-0.596
PebMYB130	Chr1	59621572	59623177	2	2	17-71,74-122	269	31336	6.56	74.92	57.58	-1.029
PebMYB131	Chr1	61124828	61127168	2	2	9-63,66-114	317	35559.9	5.53	42.25	74.86	-0.572
PebMYB132	Chr1	62959013	62960369	2	2	12-64,67-115	312	35668.2	8.67	39.25	72.79	-0.796
PebMYB133	Chr1	64054923	64056151	2	2	21-68,73-121	283	32843.9	6.52	50.12	68.9	-0.827
PebMYB134	Chr1	60518412	60520644	2	2	25-77,131-185	301	33587.6	8.4	48.87	63.52	-0.674
PebMYB135	Chr12	31414093	31414984	2	2	86-135,138-186	265	30194.9	6.67	48.57	60.04	-0.773
PebMYB136	Chr12	35873335	35877237	2	2	87-136,139-187	394	43606	8.9	51.25	65.61	-0.617
PebMYB137	Chr13	1936491	1937354	2	2	6-59,62-110	287	31810.4	6.21	59.47	71.01	-0.775
PebMYB138	Chr2	2086123	2087588	2	2	18-74,126-180	293	33403.3	6.77	47.48	63.52	-0.778
PebMYB139	Chr2	3555862	3559025	2	2	2-55,58-105	867	99015.9	5.63	56.27	73.78	-0.948
PebMYB140	Chr13	29007286	29008708	2	2	35-89,92-140	285	33033.9	7.68	76.47	56.74	-0.976
PebMYB141	Chr13	34931691	34933213	2	2	15-69,72-120	282	32255.3	6.46	52.11	76.03	-0.656
PebMYB142	Chr13	35336008	35341019	2	2	24-73,76-124	484	54011.6	6.41	53.36	64.55	-0.682
PebMYB143	Chr13	30703483	30705832	2	2	9-63,66-114	320	35787.1	5.85	48.78	68.62	-0.63
PebMYB144	Chr14	5417429	5418442	2	2	9-63,66-114	242	27069	8.88	41.09	81.03	-0.537
PebMYB145	Chr14	22005384	22008220	2	2	9-63,66-114	226	25143.6	10.2	44.57	67.3	-0.917
PebMYB146	Chr14	28220478	28221603	2	2	11-65,68-116	229	26834.3	7.8	50	65.98	-0.827
PebMYB147	Chr16	2565966	2568174	2	2	10-62，111-165	214	24384.3	8.94	54.08	69.25	-0.827
PebMYB148	Chr16	290301	292486	2	2	129-182,185-233	433	49301.6	5.37	42.07	60.55	-0.83
PebMYB149	Chr16	3551267	3552483	2	2	9-63,66-114	273	30233.7	9.32	42.75	83.26	-0.522
PebMYB150	Chr16	3813375	3814357	2	2	12-66,69-117	182	20457.1	8.1	50.19	69.18	-0.786
PebMYB151	Chr16	7024358	7025667	2	2	9-63,66-114	336	37505.3	8.65	41.5	75.48	-0.585
PebMYB152	Chr17	24323294	24324690	2	2	22-78,122-176	278	31708.8	9.1	45.73	57.52	-0.813
PebMYB153	ChrUN	263798	265255	2	2	11-64，67-115	295	32976.1	8.96	68.54	61.83	-0.813
PebMYB154	ChrUN	343348	344805	2	2	11-64,67-115	295	32976.1	8.96	68.54	61.83	-0.813
PebMYB155	ChrUN	128091	129525	2	2	4-60,144-198	314	34946.2	7.36	63.94	61.5	-0.756
PebMYB3R1	Chr4	39354169	39360490	3	3	51-104,107-156,159-207	585	64774.8	8.1	53.07	72.17	-0.595
PebMYB3R2	Chr8	41673386	41678613	3	3	84-137,140-189,192-240	483	54210.8	8.6	51.69	66.85	-0.694
PebMYB3R3	Chr10	3052710	3062643	3	3	160-213,216-265,268-316	646	71698.7	8.78	53.07	69.35	-0.635
PebMYB3R4	Chr13	1440326	1448614	3	3	33-86,89-128,141-189	996	110319	5.48	54.37	66.58	-0.597
PebMYB3R5	Chr1	11756109	11773020	3	3	33-86,89-138,141-189	1009	111836	5.4	54.44	67.54	-0.592
PebMYB3R6	Chr18	28914001	28923420	3	3	529-600,602-649,652-718	811	93829.1	7.96	51.38	53.49	-1.309
PebMYB4R1	Chr11	37270143	37276740	5	4	326-423,426-476,479-528,532-581,584-632	730	81892.3	6.04	47.67	74.85	-0.611
PebMYB4R2	Chr2	8256033	8265004	5	4	322-419,422-472,475-524,528-577,580-628	1056	117734	6.23	51.76	72.95	-0.628

## Sheet: Table S3
The seqlog of motifs of R2R3-type PebMYB genes
Motif	Logo
Motif 1
Motif 2
Motif 3
Motif 4
Motif 5
Motif 6
Motif 7
Motif 8
Motif 9
Motif 10
Motif 11
Motif 12
Motif 13
Motif 14
Motif 15
Motif 16
Motif 17
Motif 18
Motif 19
Motif 20

## Sheet: Table S4
The seqlog of motifs of 1R-MYB, 3R-MYB and 4R-MYB genes in P. eburnea
Motif	Logo
Motif 1
Motif 2
Motif 3
Motif 4
Motif 5
Motif 6
Motif 7
Motif 8
Motif 9
Motif 10
Motif 11
Motif 12
Motif 13
Motif 14
Motif 15
Motif 16
Motif 17
Motif 18
Motif 19
Motif 20

## Sheet: Table S5
The Ka/Ks results of duplicated PebMYB genes
Seq_1	Seq_2	Ka	Ks	Ka_Ks
PebMYB1	PebMYB15	0.0661021	0.291725	0.22659
PebMYB3	PebMYB117	0.0564571	0.257605	0.219161
PebMYB3	PebMYB153	0.21533	1.15814	0.185928
PebMYB3	PebMYB154	0.21533	1.18241	0.18211
PebMYB4	PebMYB94	0.0463077	0.249765	0.185405
PebMYB4	PebMYB26	0.337061	1.5308	0.220187
PebMYB4	PebMYB36	0.394811	1.57256	0.251063
PebMYB5	peb_ctg439.42	0.202018	1.48604	0.135944
PebMYB5	peb_ctg485.220	0.321696	1.21498	0.264776
PebMYB6	PebMYB113	0.102435	0.224864	0.455544
PebMYB7	PebMYB81	0.0716107	0.331109	0.216275
PebMYB8	peb_ctg1.80	0.0817399	0.331963	0.246232
PebMYB8	PebMYB89	0	0.00784321	0
PebMYB8	PebMYB41	0.146482	1.20307	0.121757
PebMYB11	PebMYB53	0.0347244	0.181369	0.191458
PebMYB12	PebMYB22	0.055975	0.297569	0.188107
PebMYB13	PebMYB47	0.0684251	0.155711	0.439436
PebMYB14	PebMYB68	0.157934	1.25768	0.125575
PebMYB15	PebMYB1	0.0661021	0.291725	0.22659
PebMYB16	peb_ctg237.401	0.108804	0.272271	0.399617
PebMYB16	PebMYB91	0.271724	0.910189	0.298536
PebMYB17	PebMYB82	0.229899	1.2687	0.181208
PebMYB17	peb_ctg712.823	0.129772	0.462713	0.280459
PebMYB20	PebMYB101	0.292951	1.19067	0.246039
PebMYB20	PebMYB141	0.220518	1.18776	0.185659
PebMYB21	PebMYB31	0.0858445	0.243393	0.352699
PebMYB22	PebMYB12	0.055975	0.297569	0.188107
PebMYB24	PebMYB32	0.00395605	0.00924511	0.427908
PebMYB24	PebMYB108	0.310566	2.03583	0.15255
PebMYB24	PebMYB76	0.0564073	0.327465	0.172254
PebMYB24	PebMYB131	0.194423	0.991476	0.196094
PebMYB24	PebMYB143	0.18551	1.44864	0.128058
PebMYB25	peb_ctg484.181	0.257662	0.842375	0.305876
PebMYB26	PebMYB60	0.267463	1.23546	0.216488
PebMYB26	PebMYB4	0.337061	1.5308	0.220187
PebMYB26	PebMYB94	0.338597	1.14691	0.295226
PebMYB26	PebMYB36	0.086464	0.150527	0.57441
PebMYB27	PebMYB115	0.420768	1.16219	0.362047
PebMYB29	PebMYB115	0.391315	1.13464	0.344881
PebMYB31	PebMYB21	0.0858445	0.243393	0.352699
PebMYB31	peb_ctg651.689	0.48455	1.47886	0.327651
PebMYB32	PebMYB24	0.00395605	0.00924511	0.427908
PebMYB33	peb_ctg357.1100	0.0940038	0.209443	0.448828
PebMYB34	PebMYB64	0.0533199	0.25381	0.210078
PebMYB35	PebMYB65	0.0521924	0.276195	0.18897
PebMYB36	PebMYB60	0.251905	1.0571	0.238299
PebMYB36	PebMYB4	0.394811	1.57256	0.251063
PebMYB36	PebMYB26	0.086464	0.150527	0.57441
PebMYB37	PebMYB38	0.395994	3.15086	0.125678
PebMYB37	PebMYB42	0.215864	2.70371	0.0798399
PebMYB37	peb_ctg62.198	0.364019	2.68614	0.135518
PebMYB38	PebMYB37	0.400764	2.54528	0.157454
PebMYB38	PebMYB54	0.206561	1.77898	0.116112
PebMYB38	peb_ctg566.626	0.122722	0.453814	0.270424
PebMYB39	PebMYB79	0.070453	0.237867	0.296187
PebMYB39	peb_ctg616.55	0.228698	0.999912	0.228718
PebMYB39	PebMYB151	0.213565	0.951551	0.224439
PebMYB41	PebMYB89	0.146482	1.24417	0.117734
PebMYB41	peb_ctg1403.246	0.0799235	0.1783	0.448253
PebMYB41	PebMYB8	0.146482	1.20307	0.121757
PebMYB42	PebMYB37	0.215864	2.70371	0.0798399
PebMYB42	PebMYB103	0.477012	NaN	NaN
PebMYB43	PebMYB72	0.0981792	0.232616	0.422065
PebMYB44	PebMYB73	0.0608302	0.213369	0.285094
PebMYB45	peb_ctg432.23	0.0345758	0.756673	0.0456945
PebMYB45	PebMYB57	0.29567	1.48176	0.199539
PebMYB46	PebMYB125	0.0660309	0.35195	0.187615
PebMYB47	PebMYB13	0.0684251	0.155711	0.439436
PebMYB48	peb_ctg136.58	0.225872	1.36057	0.166013
PebMYB48	peb_ctg238.134	0.182051	1.21782	0.14949
PebMYB48	PebMYB99	0.0571985	0.587184	0.0974114
PebMYB49	PebMYB80	0.206262	0.976296	0.21127
PebMYB49	PebMYB90	0.0300202	0.250256	0.119958
PebMYB50	PebMYB52	0.19232	1.04801	0.18351
PebMYB51	peb_ctg672.13	0.112605	0.363991	0.309362
PebMYB52	peb_ctg2.23	0.391517	NaN	NaN
PebMYB52	PebMYB50	0.19232	1.04801	0.18351
PebMYB53	PebMYB11	0.0347244	0.181369	0.191458
PebMYB54	PebMYB38	0.206561	1.77898	0.116112
PebMYB54	peb_ctg566.626	0.397413	1.41205	0.281444
PebMYB55	peb_ctg2.15	0.0792901	1.10263	0.0719099
PebMYB55	peb_ctg566.639	0.158886	1.36974	0.115998
PebMYB56	peb_ctg122.72	0.0703794	0.310426	0.226719
PebMYB56	PebMYB88	0.207559	1.22483	0.16946
PebMYB57	peb_ctg432.23	0.00423132	0.179226	0.0236088
PebMYB57	PebMYB45	0.29567	1.48176	0.199539
PebMYB60	PebMYB26	0.267463	1.23546	0.216488
PebMYB60	PebMYB36	0.251905	1.0571	0.238299
PebMYB62	PebMYB3R2	0.226659	0.525869	0.431018
PebMYB62	PebMYB3R3	0.245629	0.54804	0.448196
PebMYB63	PebMYB98	0.0549026	0.149238	0.367886
PebMYB63	PebMYB84	0.305311	0.870551	0.35071
PebMYB64	PebMYB34	0.0533199	0.25381	0.210078
PebMYB65	PebMYB35	0.0521924	0.276195	0.18897
PebMYB67	PebMYB146	0.0469132	0.376067	0.124747
PebMYB68	PebMYB14	0.157934	1.25768	0.125575
PebMYB69	PebMYB71	0.0523068	0.301763	0.173337
PebMYB71	PebMYB69	0.0523068	0.301763	0.173337
PebMYB72	PebMYB43	0.0981792	0.232616	0.422065
PebMYB73	PebMYB44	0.0608302	0.213369	0.285094
PebMYB76	PebMYB24	0.0564073	0.327465	0.172254
PebMYB77	PebMYB130	0.229964	1.12238	0.20489
PebMYB77	PebMYB140	0.204581	1.44084	0.141988
PebMYB78	PebMYB82	0.0760242	0.236244	0.321804
PebMYB79	PebMYB39	0.070453	0.237867	0.296187
PebMYB79	peb_ctg616.55	0.241858	1.11682	0.21656
PebMYB80	PebMYB90	0.226638	0.911249	0.248712
PebMYB80	PebMYB49	0.206262	0.976296	0.21127
PebMYB81	PebMYB7	0.0716107	0.331109	0.216275
PebMYB82	PebMYB17	0.229899	1.2687	0.181208
PebMYB82	PebMYB78	0.0760242	0.236244	0.321804
PebMYB84	PebMYB63	0.305311	0.870551	0.35071
PebMYB84	PebMYB98	0.304341	0.789794	0.385343
PebMYB88	peb_ctg122.72	0.328771	1.16718	0.28168
PebMYB88	PebMYB56	0.207559	1.22483	0.16946
PebMYB88	PebMYB144	0.0762682	0.336136	0.226897
PebMYB89	peb_ctg1.80	0.0817399	0.331963	0.246232
PebMYB89	PebMYB41	0.146482	1.24417	0.117734
PebMYB89	PebMYB8	0	0.00784321	0
PebMYB90	PebMYB80	0.226638	0.911249	0.248712
PebMYB90	PebMYB49	0.0300202	0.250256	0.119958
PebMYB91	PebMYB16	0.271724	0.910189	0.298536
PebMYB93	peb_ctg129.53	0.247637	NaN	NaN
PebMYB93	PebMYB152	0.222242	1.96732	0.112967
PebMYB94	PebMYB4	0.0463077	0.249765	0.185405
PebMYB94	PebMYB26	0.358406	1.20425	0.297618
PebMYB98	PebMYB63	0.0549026	0.149238	0.367886
PebMYB98	PebMYB84	0.304341	0.789794	0.385343
PebMYB99	peb_ctg136.58	0.163568	2.06386	0.0792535
PebMYB99	peb_ctg238.134	0.16302	1.98666	0.0820573
PebMYB99	PebMYB48	0.0571985	0.587184	0.0974114
PebMYB100	peb_ctg561.6	0.0817393	0.300053	0.272417
PebMYB101	PebMYB20	0.292951	1.19067	0.246039
PebMYB101	PebMYB133	0.308253	1.31514	0.234387
PebMYB101	PebMYB141	0.314373	1.14748	0.273967
PebMYB102	PebMYB107	0.136215	0.381572	0.356984
PebMYB102	PebMYB118	0.375328	1.93454	0.194014
PebMYB103	PebMYB42	0.477012	NaN	NaN
PebMYB104	PebMYB109	0.0465319	0.198216	0.234753
PebMYB105	PebMYB110	0.0612085	0.198519	0.308325
PebMYB106	PebMYB114	0.0529564	0.21539	0.245863
PebMYB107	PebMYB102	0.136215	0.381572	0.356984
PebMYB107	PebMYB118	0.396051	1.70299	0.232562
PebMYB108	peb_ctg2.15	0.0450511	1.30815	0.0344388
PebMYB108	peb_ctg566.639	0.130477	1.11409	0.117116
PebMYB108	PebMYB24	0.310566	2.03583	0.15255
PebMYB109	PebMYB104	0.0465319	0.198216	0.234753
PebMYB110	PebMYB105	0.0612085	0.198519	0.308325
PebMYB111	peb_ctg485.164	0.352302	0.548166	0.642693
PebMYB111	PebMYB152	0.242911	1.37709	0.176394
PebMYB112	peb_ctg484.181	0.218564	0.455	0.48036
PebMYB113	PebMYB6	0.102435	0.224864	0.455544
PebMYB114	PebMYB106	0.0529564	0.21539	0.245863
PebMYB115	PebMYB29	0.391315	1.13464	0.344881
PebMYB115	PebMYB27	0.420768	1.16219	0.362047
PebMYB116	PebMYB158	0.0405121	0.208716	0.194101
PebMYB117	PebMYB3	0.0564571	0.257605	0.219161
PebMYB117	PebMYB153	0.238655	1.12372	0.21238
PebMYB117	PebMYB154	0.238655	1.12372	0.21238
PebMYB118	peb_ctg120.21	0.294865	0.767329	0.384275
PebMYB118	PebMYB102	0.375328	1.93454	0.194014
PebMYB118	PebMYB107	0.396051	1.70299	0.232562
PebMYB119	PebMYB138	0.0585923	0.239124	0.245029
PebMYB119	PebMYB152	0.190694	1.57859	0.1208
PebMYB120	PebMYB139	0.0236985	0.180397	0.131368
PebMYB121	PebMYB155	0.0418781	0.253791	0.16501
PebMYB125	PebMYB46	0.0660309	0.35195	0.187615
PebMYB126	PebMYB148	0.076275	0.219448	0.347576
PebMYB127	peb_ctg713.395	0.302762	0.621241	0.48735
PebMYB129	PebMYB149	0.0494141	0.287068	0.172134
PebMYB130	PebMYB77	0.229964	1.12238	0.20489
PebMYB130	PebMYB140	0.0501488	0.217336	0.230744
PebMYB131	PebMYB143	0.065443	0.221955	0.294848
PebMYB131	PebMYB24	0.194423	0.991476	0.196094
PebMYB133	PebMYB101	0.308253	1.31514	0.234387
PebMYB133	PebMYB141	0.0626787	0.200218	0.313053
PebMYB134	PebMYB198	0.0515898	0.23595	0.218648
PebMYB137	peb_ctg17.23	0.100555	0.303304	0.331532
PebMYB138	peb_ctg129.53	0.182095	2.93279	0.0620895
PebMYB138	PebMYB119	0.0585923	0.239124	0.245029
PebMYB139	PebMYB120	0.0236985	0.180397	0.131368
PebMYB140	PebMYB77	0.204581	1.44084	0.141988
PebMYB140	PebMYB130	0.0501488	0.217336	0.230744
PebMYB141	PebMYB101	0.314373	1.14748	0.273967
PebMYB141	PebMYB20	0.220518	1.18776	0.185659
PebMYB141	PebMYB133	0.0626787	0.200218	0.313053
PebMYB142	PebMYB193	0.0494737	0.18049	0.274108
PebMYB143	PebMYB131	0.065443	0.221955	0.294848
PebMYB143	PebMYB24	0.18551	1.44864	0.128058
PebMYB144	peb_ctg122.72	0.256016	1.03569	0.247195
PebMYB144	PebMYB88	0.0762682	0.336136	0.226897
PebMYB146	PebMYB67	0.0469132	0.376067	0.124747
PebMYB148	PebMYB126	0.076275	0.219448	0.347576
PebMYB149	PebMYB129	0.0494141	0.287068	0.172134
PebMYB151	PebMYB39	0.213565	0.951551	0.224439
PebMYB151	peb_ctg616.55	0.049975	0.311551	0.160407
PebMYB151	peb_ctg651.834	0.236667	1.63776	0.144506
PebMYB152	peb_ctg129.53	0.0772439	0.313407	0.246465
PebMYB152	PebMYB93	0.222242	1.96732	0.112967
PebMYB152	PebMYB111	0.242911	1.37709	0.176394
PebMYB152	PebMYB119	0.190694	1.57859	0.1208
PebMYB153	PebMYB3	0.21533	1.15814	0.185928
PebMYB153	PebMYB117	0.238655	1.12372	0.21238
PebMYB153	PebMYB154	0	0.0198523	0
PebMYB154	PebMYB3	0.21533	1.18241	0.18211
PebMYB154	PebMYB117	0.238655	1.12372	0.21238
PebMYB154	PebMYB153	0	0.0198523	0
PebMYB155	PebMYB121	0.0418781	0.253791	0.16501
PebMYB156	PebMYB212	0.0516555	0.204901	0.252099
PebMYB156	PebMYB214	0.0495195	0.213364	0.232089
PebMYB157	PebMYB207	0.038996	0.227251	0.171599
PebMYB158	PebMYB116	0.0405121	0.208716	0.194101
PebMYB159	PebMYB183	0.0422868	0.08958	0.472056
PebMYB160	PebMYB195	0.195419	2.06319	0.0947171
PebMYB160	PebMYB209	0.255162	1.8244	0.139861
PebMYB161	PebMYB184	0.0465323	0.172102	0.270376
PebMYB161	PebMYB203	0.129564	0.74373	0.174208
PebMYB162	PebMYB173	0.0396568	0.21915	0.180957
PebMYB163	PebMYB170	0.334084	0.815432	0.409702
PebMYB163	PebMYB178	0.338629	0.654779	0.517165
PebMYB164	PebMYB215	0.054092	0.191747	0.282101
PebMYB165	PebMYB166	0.0775985	0.224845	0.34512
PebMYB166	PebMYB165	0.0775985	0.224845	0.34512
PebMYB168	PebMYB177	0.0634053	0.381242	0.166312
PebMYB170	PebMYB163	0.334084	0.815432	0.409702
PebMYB170	PebMYB178	0.20546	0.461011	0.445673
PebMYB173	PebMYB162	0.0396568	0.21915	0.180957
PebMYB174	peb_ctg125.656	0.168477	0.236418	0.712625
PebMYB175	peb_ctg137.18	0.0621374	0.228159	0.272343
PebMYB177	PebMYB168	0.0634053	0.381242	0.166312
PebMYB178	PebMYB163	0.338629	0.654779	0.517165
PebMYB178	PebMYB170	0.20546	0.461011	0.445673
PebMYB179	PebMYB180	0.102317	0.247968	0.412622
PebMYB180	PebMYB179	0.102317	0.247968	0.412622
PebMYB183	PebMYB159	0.0422868	0.08958	0.472056
PebMYB184	PebMYB161	0.0465323	0.172102	0.270376
PebMYB184	PebMYB203	0.124742	0.66741	0.186905
PebMYB184	PebMYB208	0.172876	0.819495	0.210954
PebMYB186	PebMYB220	0.0899533	0.321751	0.279574
PebMYB189	PebMYB210	0.0709989	0.221598	0.320395
PebMYB190	PebMYB191	0.00128068	0.00623704	0.205335
PebMYB190	PebMYB197	0.0691517	0.195195	0.35427
PebMYB191	PebMYB190	0.00128068	0.00623704	0.205335
PebMYB191	PebMYB197	0.0705789	0.200476	0.352057
PebMYB193	PebMYB142	0.0494737	0.18049	0.274108
PebMYB195	PebMYB160	0.195419	2.06319	0.0947171
PebMYB195	PebMYB209	0.125619	0.889791	0.141178
PebMYB195	PebMYB217	0.0286545	0.243222	0.117812
PebMYB196	peb_ctg522.370	0.0918844	0.174557	0.526385
PebMYB197	PebMYB190	0.0691517	0.195195	0.35427
PebMYB197	PebMYB191	0.0705789	0.200476	0.352057
PebMYB198	PebMYB134	0.0515898	0.23595	0.218648
PebMYB199	peb_ctg61.214	0.108363	0.20576	0.526647
PebMYB202	peb_ctg62.189	0.0845139	0.172815	0.489043
PebMYB203	PebMYB161	0.129564	0.74373	0.174208
PebMYB203	PebMYB184	0.124742	0.66741	0.186905
PebMYB203	PebMYB208	0.0840937	0.233427	0.360257
PebMYB204	peb_ctg687.17	0.0601223	0.197134	0.304981
PebMYB205	PebMYB209	0.0422647	0.188486	0.224233
PebMYB205	PebMYB213	0.180799	1.94176	0.0931111
PebMYB207	PebMYB157	0.038996	0.227251	0.171599
PebMYB208	PebMYB184	0.172876	0.819495	0.210954
PebMYB208	PebMYB203	0.0840937	0.233427	0.360257
PebMYB209	PebMYB160	0.255162	1.8244	0.139861
PebMYB209	PebMYB195	0.125619	0.889791	0.141178
PebMYB209	PebMYB205	0.0422647	0.188486	0.224233
PebMYB209	PebMYB213	0.160502	1.67748	0.0956804
PebMYB210	peb_ctg137.18	0.120626	1.16078	0.103918
PebMYB210	PebMYB189	0.0709989	0.221598	0.320395
PebMYB210	PebMYB213	0.307675	NaN	NaN
PebMYB212	PebMYB156	0.0516555	0.204901	0.252099
PebMYB212	PebMYB214	0.00371058	0.0246936	0.150265
PebMYB213	PebMYB205	0.180799	1.94176	0.0931111
PebMYB213	PebMYB209	0.160502	1.67748	0.0956804
PebMYB213	PebMYB210	0.307675	NaN	NaN
PebMYB214	PebMYB156	0.0495195	0.213364	0.232089
PebMYB214	PebMYB212	0.00371058	0.0246936	0.150265
PebMYB215	PebMYB164	0.054092	0.191747	0.282101
PebMYB216	peb_ctg128.182	0.0702314	0.251792	0.278927
PebMYB217	PebMYB195	0.0286545	0.243222	0.117812
PebMYB218	peb_ctg621.108	0.0235083	0.147845	0.159006
PebMYB220	PebMYB186	0.0899533	0.321751	0.279574
PebMYB222	peb_ctg517.38	0.104586	0.345367	0.302825
PebMYB3R2	PebMYB62	0.226659	0.525869	0.431018
PebMYB3R2	PebMYB3R3	0.0979869	0.197199	0.496893
PebMYB3R3	PebMYB62	0.245629	0.54804	0.448196
PebMYB3R3	PebMYB3R2	0.0979869	0.197199	0.496893
PebMYB3R4	PebMYB3R5	0.0642862	0.167694	0.383355
PebMYB3R5	PebMYB3R4	0.0642862	0.167694	0.383355
PebMYB4R1	PebMYB4R2	0.0533831	0.188229	0.283607
PebMYB4R2	PebMYB4R1	0.0533831	0.188229	0.283607

## Sheet: Table S6
Synteny MYB genes between P. eburnea and A. th/ O. sativa
Gene1	Gene2	Gene1	Gene2
AT1G48000.1	PebMYB1	Os03t0315400-01	PebMYB1
AT2G38090.1	PebMYB100	Os01t0853700-01	PebMYB111
AT3G11280.1	PebMYB100	Os05t0449900-01	PebMYB111
AT5G05790.1	PebMYB100	Os10t0478300-01	PebMYB113
AT1G68320.1	PebMYB101	Os02t0624300-01	PebMYB113
AT1G66370.1	PebMYB102	Os04t0517100-02	PebMYB113
AT5G56110.1	PebMYB104	Os01t0975300-01	PebMYB130
AT3G48920.1	PebMYB106	Os05t0114700-02	PebMYB130
AT4G25560.1	PebMYB106	Os01t0975300-01	PebMYB140
AT5G52260.1	PebMYB106	Os12t0567300-00	PebMYB140
AT1G66370.1	PebMYB107	Os05t0114700-02	PebMYB140
AT5G56110.1	PebMYB109	Os09t0538400-01	PebMYB144
AT5G65230.1	PebMYB11	Os02t0618400-02	PebMYB146
AT2G38090.1	PebMYB111	Os01t0853700-01	PebMYB152
AT5G01200.1	PebMYB111	Os07t0558100-00	PebMYB17
AT2G47460.1	PebMYB112	Os03t0274300-01	PebMYB190
AT3G62610.1	PebMYB112	Os03t0274300-01	PebMYB194
AT5G49330.1	PebMYB112	Os01t0128000-01	PebMYB30
AT3G48920.1	PebMYB114	Os01t0841500-01	PebMYB3R2
AT4G25560.1	PebMYB114	Os05t0459000-01	PebMYB3R2
AT5G52260.1	PebMYB114	Os01t0841500-01	PebMYB3R3
AT3G13890.1	PebMYB115	Os05t0459000-01	PebMYB3R3
AT2G23290.1	PebMYB117	Os08t0248700-01	PebMYB58
AT3G50060.1	PebMYB117	Os02t0624300-01	PebMYB6
AT5G67300.1	PebMYB117	Os01t0850400-01	PebMYB61
AT1G66370.1	PebMYB118	Os01t0841500-01	PebMYB62
AT2G38090.1	PebMYB119	Os05t0459000-01	PebMYB62
AT5G01200.1	PebMYB119	Os07t0558100-00	PebMYB66
AT3G60460.1	PebMYB12	Os10t0478300-01	PebMYB69
AT5G14340.1	PebMYB125	Os09t0538400-01	PebMYB7
AT5G04760.1	PebMYB127	Os02t0624300-01	PebMYB71
AT1G57560.1	PebMYB13	Os01t0975300-01	PebMYB77
AT1G09540.1	PebMYB13	Os09t0538400-01	PebMYB81
AT3G47600.1	PebMYB131	Os07t0558100-00	PebMYB82
AT5G58900.1	PebMYB134	Os09t0538400-01	PebMYB88
AT5G01200.1	PebMYB134
AT2G39880.1	PebMYB136
AT3G55730.1	PebMYB136
AT2G38090.1	PebMYB138
AT5G01200.1	PebMYB138
AT3G61250.1	PebMYB14
AT5G59780.3	PebMYB140
AT1G14350.1	PebMYB142
AT2G02820.2	PebMYB142
AT3G47600.1	PebMYB143
AT2G16720.1	PebMYB144
AT4G38620.1	PebMYB144
AT4G34990.1	PebMYB144
AT4G13480.1	PebMYB146
AT3G10590.1	PebMYB147
AT5G04760.1	PebMYB147
AT5G15310.1	PebMYB151
AT5G61420.2	PebMYB151
AT2G38090.1	PebMYB152
AT5G01200.1	PebMYB152
AT5G58900.1	PebMYB152
AT5G56840.1	PebMYB156
AT5G08520.1	PebMYB158
AT1G01060.7	PebMYB159
AT2G21650.1	PebMYB160
AT4G39250.1	PebMYB160
AT1G49950.2	PebMYB161
AT5G47390.1	PebMYB162
AT1G72740.1	PebMYB164
AT1G70000.2	PebMYB168
AT4G21440.1	PebMYB17
AT4G28110.1	PebMYB17
AT4G05100.1	PebMYB17
AT1G72650.2	PebMYB171
AT1G17460.2	PebMYB171
AT5G47390.1	PebMYB173
AT3G09600.7	PebMYB174
AT5G02840.2	PebMYB174
AT1G75250.1	PebMYB175
AT1G19510.1	PebMYB175
AT2G18328.1	PebMYB175
AT4G36570.1	PebMYB175
AT1G70000.2	PebMYB177
AT1G49950.2	PebMYB184
AT1G18960.1	PebMYB186
AT1G19510.1	PebMYB189
AT2G21650.1	PebMYB189
AT4G36570.1	PebMYB189
AT5G57620.1	PebMYB19
AT1G07540.1	PebMYB190
AT3G46590.2	PebMYB190
AT5G59430.5	PebMYB190
AT1G13880.2	PebMYB192
AT1G26580.1	PebMYB192
AT2G03470.1	PebMYB192
AT1G14350.1	PebMYB193
AT2G02820.2	PebMYB193
AT1G07540.1	PebMYB194
AT2G21650.1	PebMYB195
AT2G18328.1	PebMYB195
AT4G39250.1	PebMYB195
AT1G07540.1	PebMYB197
AT3G46590.2	PebMYB197
AT5G59430.5	PebMYB197
AT5G58900.1	PebMYB198
AT1G68320.1	PebMYB20
AT1G01520.3	PebMYB200
AT4G01280.2	PebMYB200
AT1G26580.1	PebMYB202
AT1G13880.2	PebMYB202
AT2G03470.1	PebMYB202
AT2G21650.1	PebMYB205
AT4G39250.1	PebMYB205
AT3G16350.1	PebMYB206
AT5G47390.1	PebMYB207
AT1G75250.1	PebMYB209
AT2G21650.1	PebMYB209
AT4G39250.1	PebMYB209
AT2G32460.1	PebMYB21
AT1G19510.1	PebMYB210
AT4G36570.1	PebMYB210
AT5G52660.2	PebMYB211
AT5G56840.1	PebMYB212
AT1G19510.1	PebMYB213
AT2G21650.1	PebMYB213
AT4G39250.1	PebMYB213
AT4G36570.1	PebMYB213
AT5G56840.1	PebMYB214
AT2G21650.1	PebMYB217
AT1G74840.1	PebMYB219
AT1G19000.1	PebMYB219
AT1G70000.2	PebMYB219
AT5G07910.1	PebMYB222
AT1G74650.1	PebMYB24
AT3G47600.1	PebMYB24
AT3G62610.1	PebMYB25
AT2G36890.2	PebMYB26
AT5G23000.1	PebMYB26
AT2G26950.1	PebMYB28
AT3G13890.1	PebMYB29
AT2G23290.1	PebMYB3
AT3G50060.1	PebMYB3
AT4G37260.1	PebMYB3
AT5G67300.1	PebMYB3
AT2G32460.1	PebMYB31
AT1G69560.2	PebMYB33
AT1G26780.2	PebMYB33
AT1G79180.2	PebMYB34
AT1G16490.1	PebMYB34
AT3G12820.1	PebMYB34
AT4G12350.1	PebMYB35
AT4G22680.1	PebMYB35
AT5G62320.1	PebMYB35
AT2G36890.2	PebMYB36
AT5G23000.1	PebMYB36
AT3G01140.1	PebMYB37
AT5G15310.1	PebMYB37
AT3G01140.1	PebMYB38
AT5G15310.1	PebMYB38
AT5G07690.1	PebMYB38
AT5G61420.2	PebMYB38
AT3G09370.3	PebMYB3R2
AT5G02320.2	PebMYB3R2
AT3G09370.3	PebMYB3R3
AT5G02320.2	PebMYB3R3
AT2G36890.2	PebMYB4
AT1G66230.1	PebMYB40
AT3G27810.1	PebMYB41
AT3G01140.1	PebMYB42
AT5G15310.1	PebMYB42
AT3G49690.1	PebMYB44
AT4G37780.1	PebMYB44
AT5G65790.1	PebMYB44
AT5G14340.1	PebMYB46
AT5G26660.1	PebMYB47
AT1G35515.1	PebMYB49
AT3G18100.1	PebMYB4R1
AT3G18100.1	PebMYB4R2
AT2G37630.1	PebMYB5
AT1G69560.2	PebMYB50
AT1G26780.2	PebMYB50
AT1G26780.2	PebMYB52
AT1G69560.2	PebMYB52
AT5G65230.1	PebMYB53
AT3G01140.1	PebMYB54
AT5G15310.1	PebMYB54
AT4G34990.1	PebMYB56
AT4G38620.1	PebMYB56
AT5G57620.1	PebMYB58
AT2G39880.1	PebMYB61
AT3G09230.1	PebMYB61
AT3G09370.3	PebMYB62
AT5G02320.2	PebMYB62
AT1G56160.1	PebMYB64
AT1G79180.2	PebMYB64
AT1G16490.1	PebMYB64
AT3G12820.1	PebMYB64
AT4G12350.1	PebMYB65
AT4G22680.1	PebMYB65
AT4G21440.1	PebMYB66
AT4G13480.1	PebMYB67
AT3G61250.1	PebMYB68
AT3G23250.1	PebMYB69
AT2G16720.1	PebMYB7
AT4G34990.1	PebMYB7
AT4G38620.1	PebMYB7
AT3G23250.1	PebMYB71
AT3G49690.1	PebMYB73
AT4G37780.1	PebMYB73
AT5G65790.1	PebMYB73
AT1G74650.1	PebMYB76
AT3G47600.1	PebMYB76
AT5G59780.3	PebMYB77
AT3G01530.1	PebMYB8
AT3G27810.1	PebMYB8
AT5G40350.1	PebMYB8
AT1G22640.1	PebMYB80
AT1G35515.1	PebMYB80
AT2G16720.1	PebMYB81
AT4G34990.1	PebMYB81
AT4G38620.1	PebMYB81
AT4G05100.1	PebMYB82
AT4G21440.1	PebMYB82
AT2G26950.1	PebMYB84
AT3G50060.1	PebMYB85
AT5G67300.1	PebMYB85
AT1G63910.1	PebMYB86
AT3G61250.1	PebMYB87
AT2G16720.1	PebMYB88
AT4G38620.1	PebMYB88
AT4G34990.1	PebMYB88
AT1G22640.1	PebMYB90
AT1G35515.1	PebMYB90
AT1G09540.1	PebMYB92
AT2G38090.1	PebMYB93
AT5G01200.1	PebMYB93
AT5G58900.1	PebMYB93
AT2G36890.2	PebMYB94
AT5G59780.3	PebMYB96

## Sheet: Table S7
FPKM value of 4 tissues in P. eburnea
Gene	B	L	R	S
PebMYB1	1.01581	0.203589	17.4391	1.79748
PebMYB2	0.878412	1.7793	0.009358	0
PebMYB3	9.92517	7.47187	16.001	7.979
PebMYB4	0.525264	0.454319	29.0418	8.58967
PebMYB5	86.9773	27.6853	32.4125	40.9337
PebMYB6	0.0752765	0.303203	14.4535	1.8971
PebMYB7	7.85355	10.8508	1.05972	0.249408
PebMYB9	0.015746	0.0169365	0.204082	0.0461227
PebMYB10	1.74922	1.19853	2.3453	1.85146
PebMYB11	0.0681968	0.340261	3.69078	2.65672
PebMYB12	0.15148	0.147906	0.117764	0.0960833
PebMYB13	1.70823	0.254096	15.1743	1.52526
PebMYB14	4.42707	2.19554	0.094857	0.085539
PebMYB15	0.0588827	0	1.06915	0.0878693
PebMYB16	0.0876398	0.0653463	7.05956	1.34972
PebMYB17	0.551121	0.940118	0.896636	0.517238
PebMYB18	0.672876	0.21371	0.680491	1.52093
PebMYB19	0	0	7.48352	1.95383
PebMYB20	0.790312	0.633607	8.35053	2.93372
PebMYB21	0.130931	0.174114	0	0
PebMYB22	0.0927873	0.0367757	0.408736	0.082836
PebMYB23	0.0521402	0.0376335	9.87437	8.65864
PebMYB24	5.78758	3.51285	0.907251	0
PebMYB25	0.122627	0.0787975	0.0110253	0
PebMYB26	0.0538495	0.316258	1.12971	0.722117
PebMYB28	3.77465	3.02885	4.57924	2.68342
PebMYB30	1.36789	0.864696	7.84437	0.45791
PebMYB31	0.309669	0.401974	0.252061	0.148893
PebMYB32	5.96092	3.45672	0.998202	0
PebMYB33	0.0381195	0	0.362752	5.94178
PebMYB34	0	0	2.3131	0.806474
PebMYB35	0.130007	0.0639582	0.521197	0.776087
PebMYB36	0.0157905	0.0325027	0.471453	0.036125
PebMYB38	16.1271	2.76983	0.0831357	0.162969
PebMYB39	0.312085	0	0.0203163	0
PebMYB40	0.554732	0.258528	1.69459	1.01932
PebMYB42	25.0765	13.2085	0.038182	0.17362
PebMYB43	0.015326	0.0180915	6.4172	2.13312
PebMYB44	0.0209357	0.147084	2.07222	2.80628
PebMYB45	0.667839	0.147567	0.272346	0.178324
PebMYB47	3.21525	0.256861	15.3905	3.20002
PebMYB48	0.0329168	0	0.039626	0.0462187
PebMYB49	9.26997	10.8059	69.9534	16.6429
PebMYB50	0.550272	0	0	0.37084
PebMYB51	0.729896	0.327667	39.1213	8.4962
PebMYB52	1.64057	0	0	0.035595
PebMYB53	0.0653425	0.172625	4.52664	1.61475
PebMYB54	51.2291	15.8876	0.397352	1.45033
PebMYB55	0.973831	0.0489943	1.7739	0.327487
PebMYB56	17.6641	32.0832	11.93	42.4492
PebMYB57	9.8224	10.3348	0.20522	0
PebMYB58	0.0164817	0.00766125	4.66093	0.890292
PebMYB59	0.300048	0.0647608	0.785262	0.230629
PebMYB60	0.0715947	0.0238233	4.11653	1.35646
PebMYB61	14.2795	10.6839	15.6309	16.0329
PebMYB62	5.11945	2.66134	6.04323	4.74999
PebMYB63	1.03804	0.138025	0.642304	0.652033
PebMYB64	0.0895778	0.0325068	3.72652	1.10322
PebMYB65	3.26389	0.112851	6.71171	4.65264
PebMYB66	0.546151	0.648166	3.41636	1.30015
PebMYB67	0	0	0.426339	0.490396
PebMYB68	4.77018	0.566074	0.00706333	0
PebMYB69	1.65396	0.506324	8.87357	3.35837
PebMYB70	0.08272	0.0491865	9.32317	7.36195
PebMYB71	0.999642	0.0872823	26.0078	21.7128
PebMYB72	0.177449	0.180173	2.43041	4.14871
PebMYB73	0.756058	0.186723	1.30293	0.541823
PebMYB74	1.4094	0.681309	1.14098	0.136721
PebMYB75	0.205686	0.0594133	0.047115	0.184795
PebMYB76	8.49794	10.1279	18.7834	5.41305
PebMYB77	27.3114	36.955	112.069	74.3499
PebMYB78	2.54798	1.76709	0.0327757	0
PebMYB79	0.376246	0.0179438	0	0
PebMYB80	0	0.0155318	0.318827	0
PebMYB81	0.430874	1.1842	2.6988	5.90146
PebMYB82	2.91216	1.82136	0.296187	0.052986
PebMYB83	0.0865198	0.0131348	0.993412	0.402181
PebMYB84	5.144	3.53075	3.96336	4.61614
PebMYB85	30.6998	27.3087	17.8484	29.3497
PebMYB86	0.0142417	0	4.04805	1.60444
PebMYB87	11.2942	5.06668	0.396463	0.308512
PebMYB88	1.88926	1.41581	8.30889	2.19449
PebMYB90	1.73573	1.75238	19.0142	3.71738
PebMYB91	0.325727	0.360253	7.5803	2.33145
PebMYB92	0.496554	0.115639	0.887717	0.592843
PebMYB93	1.97384	2.14811	2.30253	0.863821
PebMYB94	0.271807	0.104603	25.3159	4.96054
PebMYB95	0	0.093072	2.60779	3.59139
PebMYB96	19.1394	27.8283	52.3208	47.4782
PebMYB97	1.50733	0.0147402	4.58474	1.32629
PebMYB98	0.515723	0.139849	1.00393	0.3074
PebMYB99	0.764674	0.853198	1.68297	1.54806
PebMYB100	10.6045	18.0752	4.97619	16.5489
PebMYB101	0.0424835	0	0.53831	0
PebMYB102	9.48403	2.67145	6.04864	0.578449
PebMYB103	0.00654075	0.0141532	0	0
PebMYB104	0.243921	0.0914507	0.194557	0.177694
PebMYB105	3.80675	3.11277	3.4091	3.37918
PebMYB106	0	0	0.250184	0
PebMYB107	0.75531	0.557503	0	0
PebMYB108	5.94883	4.16791	0.013327	0.00939933
PebMYB109	0.12003	0.126366	0.262627	0.089321
PebMYB110	5.30803	4.3336	5.63308	5.13832
PebMYB111	14.9956	11.3904	3.32588	0.636981
PebMYB112	0.100437	0	0.238055	0.0549877
PebMYB113	0.0236967	0.0432507	1.24731	0
PebMYB114	0	0	0.0866163	0.0134453
PebMYB115	0.0068465	0	0.0190213	0.0381637
PebMYB116	12.9949	14.6134	9.87028	9.87687
PebMYB117	19.7717	19.5252	93.6681	47.2384
PebMYB118	0.0715463	0.0152713	0.036833	0.0537717
PebMYB119	1.92728	1.45495	1.5498	1.20966
PebMYB120	15.1367	13.1127	16.3973	13.3015
PebMYB121	8.42121	5.07639	0.36784	0.903026
PebMYB122	0	0.0259482	0.326476	4.99542
PebMYB123	42.7808	37.4496	35.035	46.3511
PebMYB124	3.46946	1.09659	11.1645	4.91982
PebMYB125	0	0.0137918	0.50814	0
PebMYB127	2.48095	3.12651	6.1897	5.10495
PebMYB128	5.61381	4.48616	9.96384	9.54145
PebMYB129	278.643	68.5275	120.539	45.0407
PebMYB130	22.3895	33.5468	24.3085	25.3498
PebMYB131	2.80532	2.71244	0.255953	0.0166307
PebMYB133	3.17778	0.693039	0.842803	1.70029
PebMYB134	4.00245	3.09194	2.37001	0.362762
PebMYB135	0.567132	0	0	0.295801
PebMYB136	1.24545	1.91046	2.52389	1.4134
PebMYB137	20.0756	28.0663	17.9847	11.8106
PebMYB138	1.52028	1.64763	0.504897	1.17535
PebMYB139	14.3817	13.6765	16.1157	16.0361
PebMYB140	5.39607	11.3517	21.8157	49.5074
PebMYB141	5.02893	1.53372	2.7942	1.13898
PebMYB142	5.1016	3.65265	12.016	8.02304
PebMYB143	5.25027	3.29642	0.0553503	0.0416073
PebMYB144	0.783525	0.668654	7.40085	1.52219
PebMYB145	0.983289	0.749391	0.723593	0.0941197
PebMYB146	0	0	10.6926	10.5018
PebMYB147	2.25838	1.56835	6.75416	5.89096
PebMYB148	0.0377072	0.0258533	0.0421807	0.167514
PebMYB149	30.7335	5.04606	44.9977	14.9064
PebMYB150	2.63481	0.667722	1.08002	0.893815
PebMYB151	0.152092	0	0	0
PebMYB152	18.8319	14.1201	12.2931	10.716
PebMYB153	0.480772	0.570284	4.90075	3.74838
PebMYB154	1.75135	1.96431	15.1837	12.5072
PebMYB155	8.60295	10.1863	0.345323	0
PebMYB156	61.1456	68.5258	27.8587	24.9723
PebMYB157	15.8661	11.8334	8.56316	10.1409
PebMYB158	5.07934	5.68734	12.1994	14.324
PebMYB159	87.5928	128.046	32.248	56.9075
PebMYB160	2.97563	2.01836	2.82302	4.35763
PebMYB161	9.7892	10.4517	11.925	11.4852
PebMYB162	10.4283	11.2191	14.0819	12.8963
PebMYB163	0.230185	0.303965	0.469153	0.89565
PebMYB164	13.2924	15.8229	16.661	25.1494
PebMYB165	8.97466	6.98812	17.5221	17.8738
PebMYB166	18.7118	14.7537	20.9495	27.1996
PebMYB167	22.5682	16.7714	9.59577	14.4432
PebMYB168	17.6136	13.7297	21.1932	8.39819
PebMYB169	6.80904	6.90753	7.21391	6.32954
PebMYB170	10.808	8.30843	10.5891	11.5977
PebMYB171	21.8359	16.9328	27.8328	30.6825
PebMYB172	50.6946	39.6594	10.9781	11.5186
PebMYB173	18.192	18.4136	10.1833	10.0571
PebMYB174	37.5627	19.5293	2.99286	8.2695
PebMYB175	0.226443	1.14421	0.103722	0.453405
PebMYB176	17.5808	14.9995	4.00823	6.60244
PebMYB177	13.0551	10.2617	48.5315	6.62912
PebMYB179	3.3708	3.20974	12.4568	9.2102
PebMYB180	6.33743	5.58598	6.01124	4.74353
PebMYB181	5.26543	5.5075	8.17011	7.31632
PebMYB182	13.3417	11.6973	17.616	15.0057
PebMYB183	32.1153	31.2503	14.6384	22.4084
PebMYB184	14.581	9.72484	17.8189	14.6838
PebMYB185	42.928	47.9532	112.143	68.223
PebMYB187	6.08954	5.90514	8.30055	8.43522
PebMYB188	10.0349	6.97381	17.5211	13.0008
PebMYB189	1.26856	4.96173	0.996377	3.62557
PebMYB190	1.87167	1.75347	2.74111	3.05417
PebMYB191	1.78621	1.67562	2.60974	2.81093
PebMYB192	5.4192	4.49828	8.39324	4.49885
PebMYB193	1.70478	0.51031	3.95679	1.99923
PebMYB194	7.52779	6.6504	15.3468	11.3636
PebMYB195	3.00247	11.5678	0.251402	0
PebMYB196	21.7843	13.1941	17.3596	13.1514
PebMYB197	2.38971	2.79184	5.01385	6.27356
PebMYB198	19.4224	12.3223	4.70738	9.31364
PebMYB199	17.1159	12.3432	22.3931	30.3145
PebMYB200	6.15504	3.60499	6.22064	8.79343
PebMYB201	0.258629	0.482115	1.17972	1.24958
PebMYB202	6.82492	6.42804	9.7702	6.53191
PebMYB203	8.79331	4.3307	6.9261	6.15578
PebMYB204	0.781721	5.66118	0	0.131906
PebMYB205	0.108207	0.239394	0	0
PebMYB206	0.0475273	0.134028	0	0
PebMYB207	6.1125	6.7365	3.97439	2.79921
PebMYB208	3.65268	2.09281	5.29958	2.79933
PebMYB209	0.381803	0.885527	0	0
PebMYB210	0.612389	1.64374	0.449277	4.05454
PebMYB211	20.1441	19.515	21.8768	27.1929
PebMYB212	70.1568	63.5513	0.169464	0.126898
PebMYB213	0.087932	0.288361	0	0
PebMYB214	10.4876	9.30316	0.041955	0
PebMYB215	19.6848	19.4753	7.91608	18.6779
PebMYB216	26.8691	14.6838	42.3568	44.71
PebMYB217	0.489354	0.122875	0.905668	2.90891
PebMYB218	1.51555	2.83213	0	0
PebMYB219	68.2069	55.3657	113.651	51.7614
PebMYB221	128.408	109.58	133.69	55.3038
PebMYB222	9.23439	7.854	12.7296	7.25739
PebMYB3R1	2.21441	0.741789	2.65046	3.30693
PebMYB3R2	13.8891	15.5801	6.17435	9.06733
PebMYB3R3	226.199	228.602	287.214	611.195
PebMYB3R4	3.83719	1.85251	4.83545	2.69074
PebMYB3R5	2.57929	1.60866	7.08406	4.92777
PebMYB3R6	14.9087	16.1911	16.0491	13.3492
PebMYB4R1	3.62766	2.00061	3.295	2.5009
PebMYB4R2	5.63112	5.09279	6.84832	7.32834

## Sheet: Table S8
cis-element of promoters of PebMYB genes
Light response
G-box	cis-acting regulatory element involved in light responsiveness
MRE	MYB binding site involved in light responsiveness
GT1-motif	light responsive element
ACE	cis-acting element involved in light responsiveness
AAAC-motif	light responsive element
3-AF1 binding site	light responsive element
Sp1	light responsive element
Foundermental
circadian	cis-acting regulatory element involved in circadian control
HD-Zip 1	element involved in differentiation of the palisade mesophyll cells
RY-element	cis-acting regulatory element involved in seed-specific regulation
GC-motif	enhancer-like element involved in anoxic specific inducibility
MBSI	MYB binding site involved in flavonoid biosynthetic genes regulation
ARE	cis-acting regulatory element essential for the anaerobic induction
MSA-like	cis-acting element involved in cell cycle regulation
Stress response
LTR	cis-acting element involved in low-temperature responsiveness
TC-rich repeats	cis-acting element involved in defense and stress responsiveness
MBS	MYB binding site involved in drought-inducibility
DRE	cis-acting element involved in dehydration, low-temp, salt stresses
WUN-motif	wound-responsive element
hormone response
ABRE	cis-acting element involved in the abscisic acid responsiveness
TGACG-motif	cis-acting regulatory element involved in the MeJA-responsiveness
CGTCA-motif	cis-acting regulatory element involved in the MeJA-responsiveness
TCA-element	cis-acting element involved in salicylic acid responsiveness
P-box	gibberellin-responsive element and part of a light responsive element
TATC-box	cis-acting element involved in gibberellin-responsiveness
GARE-motif	gibberellin-responsive element
AuxRR-core	cis-acting regulatory element involved in auxin responsiveness
SARE	cis-acting element involved in salicylic acid responsiveness

## Sheet: Table S9
The PCC between PebMYB genes and other TFs
TFs	PebMYB genes	PCC	p_value	relation
HD-ZIP41	PebMYB38	0.997248	1.24e-12	positive
HD-ZIP41	PebMYB68	0.997217	1.31e-12	positive
Trihelix29	PebMYB16	0.997165	1.44e-12	positive
GARP52	PebMYB16	0.996785	2.69e-12	positive
NAC14	PebMYB80	0.996558	3.78e-12	positive
bHLH85	PebMYB38	0.996491	4.17e-12	positive
C2C2-YABBY3	PebMYB42	0.99643	4.54e-12	positive
GARP9	PebMYB19	0.996204	6.17e-12	positive
C2H238	PebMYB16	0.995561	1.35e-11	positive
bHLH107	PebMYB106	0.995474	1.48e-11	positive
HD-ZIP18	PebMYB33	0.995293	1.81e-11	positive
WRKY27	PebMYB51	0.995093	2.22e-11	positive
AP2/ERF87	PebMYB47	0.994728	3.18e-11	positive
bZIP2	PebMYB1	0.994357	4.46e-11	positive
bZIP2	PebMYB6	0.994149	5.35e-11	positive
SBP10	PebMYB58	0.993847	6.88e-11	positive
C2H296	PebMYB51	0.993781	7.25e-11	positive
bHLH105	PebMYB106	0.993763	7.35e-11	positive
GRAS54	PebMYB106	0.993743	7.47e-11	positive
C2C2-CO5	PebMYB78	0.993426	9.57e-11	positive
HSF2	PebMYB6	0.993376	9.93e-11	positive
C2H249	PebMYB51	0.993289	1.06e-10	positive
C2H296	PebMYB6	0.99321	1.12e-10	positive
AP2/ERF25	PebMYB54	0.992949	1.36e-10	positive
HD-ZIP17	PebMYB54	0.992885	1.42e-10	positive
RWP-RK4	PebMYB90	0.992855	1.45e-10	positive
WRKY68	PebMYB177	0.992777	1.53e-10	positive
AP2/ERF72	PebMYB16	0.992682	1.63e-10	positive
NAC34	PebMYB16	0.992682	1.63e-10	positive
bZIP73	PebMYB94	0.992614	1.71e-10	positive
C2H252	PebMYB212	0.992578	1.75e-10	positive
LOB4	PebMYB43	0.992496	1.85e-10	positive
bHLH10	PebMYB94	0.992459	1.9e-10	positive
AP2/ERF27	PebMYB51	0.992393	1.98e-10	positive
AP2/ERF15	PebMYB94	0.99239	1.98e-10	positive
C2H29	PebMYB1	0.992385	1.99e-10	positive
AP2/ERF118	PebMYB16	0.992293	2.11e-10	positive
GARP9	PebMYB58	0.992276	2.14e-10	positive
GARP52	PebMYB58	0.99214	2.33e-10	positive
C2C2-YABBY7	PebMYB121	0.992124	2.36e-10	positive
bZIP82	PebMYB30	0.991991	2.56e-10	positive
C2C2-Dof14	PebMYB90	0.99199	2.56e-10	positive
NF-YA11	PebMYB13	0.991989	2.56e-10	positive
GRAS29	PebMYB13	0.991663	3.13e-10	positive
NF-YA9	PebMYB51	0.991606	3.24e-10	positive
bHLH101	PebMYB94	0.991506	3.43e-10	positive
WRKY90	PebMYB6	0.991363	3.73e-10	positive
WRKY15	PebMYB125	0.991252	3.98e-10	positive
NAC17	PebMYB16	0.991151	4.21e-10	positive
TCP21	PebMYB212	0.991146	4.22e-10	positive
B335	PebMYB19	0.991119	4.29e-10	positive
C2H210	PebMYB30	0.991056	4.44e-10	positive
bZIP73	PebMYB13	0.991038	4.48e-10	positive
bHLH63	PebMYB212	0.990982	4.63e-10	positive
NAC17	PebMYB58	0.990909	4.82e-10	positive
HSF2	PebMYB51	0.990895	4.85e-10	positive
C2H221	PebMYB155	0.990877	4.9e-10	positive
Trihelix29	PebMYB58	0.990795	5.12e-10	positive
SBP11	PebMYB68	0.990642	5.56e-10	positive
HSF25	PebMYB90	0.990626	5.61e-10	positive
bHLH85	PebMYB68	0.990391	6.35e-10	positive
MADS-MIKC4	PebMYB30	0.990375	6.4e-10	positive
NAC6	PebMYB64	0.990341	6.51e-10	positive
WRKY27	PebMYB49	0.990259	6.79e-10	positive
NF-YA3	PebMYB90	0.990141	7.21e-10	positive
C2H226	PebMYB16	0.990139	7.22e-10	positive
GARP52	PebMYB19	0.990084	7.43e-10	positive
C2C2-Dof31	PebMYB68	0.990063	7.51e-10	positive
HB-other10	PebMYB90	0.989945	7.96e-10	positive
AP2/ERF124	PebMYB6	0.989901	8.13e-10	positive
AP2/ERF33	PebMYB51	0.989834	8.41e-10	positive
NAC6	PebMYB60	0.989825	8.45e-10	positive
GARP21	PebMYB47	0.989817	8.48e-10	positive
LOB24	PebMYB6	0.989809	8.51e-10	positive
C2C2-CO8	PebMYB54	0.989792	8.58e-10	positive
HD-ZIP59	PebMYB54	0.989788	8.6e-10	positive
C2H29	PebMYB101	0.989772	8.67e-10	positive
AP2/ERF15	PebMYB90	0.989743	8.79e-10	positive
C2H282	PebMYB113	0.98966	9.15e-10	positive
HSF14	PebMYB4	0.989643	9.22e-10	positive
HSF16	PebMYB30	0.989622	9.32e-10	positive
HD-ZIP12	PebMYB54	0.989547	9.66e-10	positive
C2H282	PebMYB13	0.989536	9.71e-10	positive
C2C2-Dof14	PebMYB94	0.989231	1.12e-09	positive
LOB22	PebMYB30	0.989198	1.14e-09	positive
SBP10	PebMYB19	0.989036	1.23e-09	positive
bHLH86	PebMYB106	0.989016	1.24e-09	positive
WRKY9	PebMYB51	0.989014	1.24e-09	positive
zf-HD15	PebMYB68	0.988995	1.25e-09	positive
GARP6	PebMYB19	0.988976	1.26e-09	positive
HB-other10	PebMYB13	0.988919	1.29e-09	positive
WRKY14	PebMYB4	0.98888	1.31e-09	positive
AP2/ERF15	PebMYB144	0.988867	1.32e-09	positive
C3H19	PebMYB71	0.988692	1.43e-09	positive
AP2/ERF15	PebMYB13	0.988658	1.45e-09	positive
HSF4	PebMYB16	0.988543	1.52e-09	positive
C2H286	PebMYB113	0.988526	1.54e-09	positive
MADS-MIKC19	PebMYB155	0.98852	1.54e-09	positive
GARP60	PebMYB13	0.988516	1.54e-09	positive
NF-YA11	PebMYB94	0.988469	1.58e-09	positive
bZIP41	PebMYB33	0.988398	1.62e-09	positive
OFP7	PebMYB4	0.988231	1.74e-09	positive
NAC34	PebMYB4	0.98821	1.76e-09	positive
Trihelix5	PebMYB38	0.988153	1.8e-09	positive
bHLH10	PebMYB13	0.988038	1.89e-09	positive
NAC32	PebMYB90	0.988008	1.91e-09	positive
GARP6	PebMYB58	0.987967	1.95e-09	positive
Trihelix5	PebMYB68	0.987891	2.01e-09	positive
LOB15	PebMYB144	0.987842	2.05e-09	positive
C2H228	PebMYB88	0.987838	2.05e-09	positive
WRKY29	PebMYB106	0.987828	2.06e-09	positive
B363	PebMYB13	0.987814	2.07e-09	positive
MADS-MIKC12	PebMYB113	0.987796	2.09e-09	positive
TCP13	PebMYB38	0.987771	2.11e-09	positive
GRAS14	PebMYB16	0.987629	2.24e-09	positive
NAC6	PebMYB4	0.987608	2.25e-09	positive
C2H249	PebMYB49	0.987602	2.26e-09	positive
C2H222	PebMYB4	0.987539	2.32e-09	positive
bHLH47	PebMYB16	0.987522	2.33e-09	positive
NAC63	PebMYB87	0.987501	2.35e-09	positive
bHLH107	PebMYB125	0.987481	2.37e-09	positive
AP2/ERF19	PebMYB51	0.987478	2.37e-09	positive
C2C2-Dof41	PebMYB90	0.987389	2.46e-09	positive
AP2/ERF30	PebMYB1	0.987388	2.46e-09	positive
GRAS4	PebMYB30	0.987333	2.51e-09	positive
AP2/ERF22	PebMYB54	0.987277	2.57e-09	positive
WRKY90	PebMYB1	0.987215	2.63e-09	positive
AP2/ERF28	PebMYB51	0.987213	2.64e-09	positive
LOB24	PebMYB1	0.987172	2.68e-09	positive
WRKY61	PebMYB16	0.98717	2.68e-09	positive
C2H29	PebMYB6	0.987102	2.75e-09	positive
MADS-MIKC12	PebMYB13	0.987065	2.79e-09	positive
bZIP73	PebMYB144	0.987052	2.8e-09	positive
HD-ZIP52	PebMYB54	0.987008	2.85e-09	positive
WRKY61	PebMYB47	0.986969	2.9e-09	positive
bHLH43	PebMYB38	0.986961	2.9e-09	positive
NF-YB2	PebMYB51	0.986911	2.96e-09	positive
NAC34	PebMYB64	0.986884	2.99e-09	positive
bHLH43	PebMYB54	0.986867	3.01e-09	positive
bHLH65	PebMYB82	0.986828	3.05e-09	positive
HB-BELL17	PebMYB38	0.986652	3.26e-09	positive
MADS-MIKC3	PebMYB15	0.986631	3.29e-09	positive
NF-YA9	PebMYB6	0.986626	3.29e-09	positive
WRKY15	PebMYB106	0.986611	3.31e-09	positive
C2H224	PebMYB13	0.986561	3.38e-09	positive
AP2/ERF34	PebMYB40	0.986552	3.39e-09	positive
C2H270	PebMYB33	0.986543	3.4e-09	positive
WRKY69	PebMYB94	0.986482	3.48e-09	positive
LOB9	PebMYB88	0.986461	3.5e-09	positive
B337	PebMYB4	0.986448	3.52e-09	positive
Trihelix29	PebMYB19	0.986385	3.6e-09	positive
AP2/ERF81	PebMYB40	0.986383	3.6e-09	positive
bZIP2	PebMYB51	0.98637	3.62e-09	positive
zf-HD12	PebMYB38	0.986345	3.65e-09	positive
AP2/ERF79	PebMYB30	0.986335	3.67e-09	positive
AP2/ERF86	PebMYB47	0.986316	3.69e-09	positive
B335	PebMYB16	0.986253	3.78e-09	positive
B335	PebMYB58	0.986245	3.79e-09	positive
bHLH61	PebMYB42	0.986228	3.81e-09	positive
zf-HD5	PebMYB16	0.98621	3.84e-09	positive
HSF2	PebMYB1	0.986188	3.87e-09	positive
C2C2-Dof13	PebMYB19	0.986179	3.88e-09	positive
C2C2-Dof18	PebMYB94	0.986087	4.01e-09	positive
AP2/ERF98	PebMYB51	0.986043	4.08e-09	positive
bHLH10	PebMYB90	0.986033	4.09e-09	positive
GARP60	PebMYB80	0.985949	4.21e-09	positive
GRAS51	PebMYB4	0.985915	4.26e-09	positive
HSF5	PebMYB47	0.985906	4.28e-09	positive
C2H233	PebMYB16	0.985889	4.3e-09	positive
AP2/ERF119	PebMYB16	0.98583	4.39e-09	positive
TCP13	PebMYB68	0.985796	4.45e-09	positive
bHLH50	PebMYB42	0.985776	4.48e-09	positive
WRKY20	PebMYB80	0.985712	4.58e-09	positive
GARP21	PebMYB58	0.985686	4.62e-09	positive
GRF16	PebMYB42	0.985678	4.63e-09	positive
zf-HD17	PebMYB78	0.985656	4.67e-09	positive
GARP1	PebMYB4	0.985437	5.03e-09	positive
WRKY45	PebMYB51	0.985429	5.05e-09	positive
SRS4	PebMYB54	0.985422	5.06e-09	positive
SBP27	PebMYB68	0.985393	5.11e-09	positive
C2H24	PebMYB4	0.985365	5.16e-09	positive
bZIP22	PebMYB42	0.98529	5.29e-09	positive
bZIP81	PebMYB16	0.98522	5.42e-09	positive
C2H226	PebMYB58	0.985196	5.46e-09	positive
GARP49	PebMYB2	0.985194	5.47e-09	positive
AP2/ERF17	PebMYB49	0.985132	5.58e-09	positive
WRKY68	PebMYB30	0.985115	5.61e-09	positive
HB-WOX6	PebMYB94	0.985097	5.65e-09	positive
NAC7	PebMYB82	0.985049	5.74e-09	positive
zf-HD10	PebMYB54	0.985026	5.78e-09	positive
B38	PebMYB88	0.984965	5.9e-09	positive
NAC32	PebMYB94	0.984956	5.92e-09	positive
C2H233	PebMYB19	0.984888	6.05e-09	positive
AP2/ERF104	PebMYB80	0.984857	6.11e-09	positive
Tify9	PebMYB88	0.984792	6.25e-09	positive
Tify17	PebMYB90	0.984779	6.27e-09	positive
bZIP81	PebMYB58	0.984763	6.31e-09	positive
NF-YA11	PebMYB80	0.984743	6.35e-09	positive
WRKY90	PebMYB51	0.984649	6.54e-09	positive
bHLH8	PebMYB90	0.984579	6.69e-09	positive
C2H240	PebMYB80	0.984567	6.72e-09	positive
zf-HD5	PebMYB58	0.984538	6.78e-09	positive
C2H226	PebMYB19	0.984466	6.94e-09	positive
bHLH8	PebMYB94	0.984443	6.99e-09	positive
C2C2-Dof39	PebMYB83	0.984406	7.07e-09	positive
HSF18	PebMYB69	0.984393	7.1e-09	positive
HD-ZIP35	PebMYB172	0.98437	7.16e-09	positive
WRKY73	PebMYB158	0.98436	7.18e-09	positive
GRAS51	PebMYB19	0.984315	7.28e-09	positive
SBP11	PebMYB38	0.984305	7.31e-09	positive
HSF20	PebMYB30	0.984291	7.34e-09	positive
bZIP35	PebMYB19	0.984217	7.51e-09	positive
MADS-MIKC22	PebMYB16	0.984189	7.58e-09	positive
AP2/ERF115	PebMYB15	0.984163	7.64e-09	positive
AP2/ERF25	PebMYB68	0.984154	7.66e-09	positive
zf-HD12	PebMYB68	0.984088	7.82e-09	positive
TCP34	PebMYB212	0.98406	7.89e-09	positive
WRKY15	PebMYB36	0.984025	7.98e-09	positive
GARP9	PebMYB16	0.984014	8.01e-09	positive
Tify17	PebMYB113	0.98401	8.01e-09	positive
MADS-MIKC4	PebMYB16	0.983931	8.21e-09	positive
GRAS50	PebMYB30	0.983834	8.46e-09	positive
bZIP42	PebMYB90	0.983739	8.71e-09	positive
SBP27	PebMYB38	0.983717	8.77e-09	positive
C3H34	PebMYB71	0.98368	8.87e-09	positive
GARP1	PebMYB86	0.98367	8.9e-09	positive
C2H232	PebMYB121	0.983662	8.92e-09	positive
MADS-MIKC12	PebMYB80	0.983654	8.94e-09	positive
HSF20	PebMYB16	0.983627	9.02e-09	positive
C2H279	PebMYB51	0.983607	9.07e-09	positive
C2H230	PebMYB212	0.983603	9.08e-09	positive
AP2/ERF16	PebMYB4	0.983553	9.22e-09	positive
HB-other13	PebMYB13	0.98355	9.23e-09	positive
NAC16	PebMYB88	0.983464	9.47e-09	positive
NAC6	PebMYB91	0.983443	9.53e-09	positive
NF-YA11	PebMYB90	0.983419	9.6e-09	positive
C2C2-GATA21	PebMYB212	0.983296	9.96e-09	positive
SBP12	PebMYB121	0.983292	9.97e-09	positive
AP2/ERF1	PebMYB86	0.983287	9.99e-09	positive
bZIP2	PebMYB101	0.983268	1e-08	positive
WRKY92	PebMYB51	0.983259	1.01e-08	positive
C2H282	PebMYB80	0.98324	1.01e-08	positive
C2H286	PebMYB90	0.983208	1.02e-08	positive
C2C2-Dof31	PebMYB54	0.983203	1.02e-08	positive
B365	PebMYB38	0.983184	1.03e-08	positive
AP2/ERF27	PebMYB49	0.983166	1.04e-08	positive
C2H264	PebMYB117	0.983164	1.04e-08	positive
WRKY60	PebMYB90	0.983118	1.05e-08	positive
GRAS30	PebMYB101	0.983096	1.06e-08	positive
NAC14	PebMYB13	0.983089	1.06e-08	positive
TCP35	PebMYB30	0.983063	1.07e-08	positive
MADS-MIKC19	PebMYB57	0.983054	1.07e-08	positive
NAC34	PebMYB60	0.983051	1.07e-08	positive
GRAS24	PebMYB30	0.983011	1.08e-08	positive
C2C2-YABBY7	PebMYB42	0.982907	1.12e-08	positive
C2H233	PebMYB58	0.982812	1.15e-08	positive
C2H238	PebMYB47	0.982735	1.17e-08	positive
C2C2-Dof13	PebMYB58	0.982715	1.18e-08	positive
GARP21	PebMYB16	0.982709	1.18e-08	positive
AP2/ERF79	PebMYB46	0.982693	1.19e-08	positive
AP2/ERF119	PebMYB15	0.982654	1.2e-08	positive
C2H296	PebMYB49	0.98265	1.2e-08	positive
HSF14	PebMYB90	0.982582	1.23e-08	positive
HSF5	PebMYB16	0.982578	1.23e-08	positive
AP2/ERF57	PebMYB80	0.982533	1.24e-08	positive
HD-ZIP44	PebMYB87	0.982447	1.27e-08	positive
GRAS5	PebMYB90	0.982393	1.29e-08	positive
C2C2-YABBY7	PebMYB87	0.982305	1.33e-08	positive
HD-ZIP50	PebMYB87	0.982296	1.33e-08	positive
B38	PebMYB47	0.982291	1.33e-08	positive
C2C2-YABBY3	PebMYB121	0.982283	1.33e-08	positive
C2H265	PebMYB69	0.982282	1.33e-08	positive
HB-other12	PebMYB90	0.982269	1.34e-08	positive
C2H296	PebMYB1	0.982247	1.35e-08	positive
C2H265	PebMYB4	0.982221	1.36e-08	positive
AP2/ERF72	PebMYB47	0.982165	1.38e-08	positive
NF-YA11	PebMYB144	0.982159	1.38e-08	positive
GARP6	PebMYB16	0.982141	1.39e-08	positive
C2C2-Dof39	PebMYB86	0.982138	1.39e-08	positive
GARP67	PebMYB80	0.982137	1.39e-08	positive
C2C2-Dof2	PebMYB4	0.982128	1.39e-08	positive
C2H249	PebMYB6	0.982056	1.42e-08	positive
HSF11	PebMYB69	0.98203	1.43e-08	positive
B337	PebMYB86	0.981947	1.47e-08	positive
NF-YB2	PebMYB49	0.981867	1.5e-08	positive
C2C2-Dof2	PebMYB58	0.981823	1.52e-08	positive
AP2/ERF19	PebMYB49	0.981784	1.53e-08	positive
HD-ZIP39	PebMYB42	0.981733	1.55e-08	positive
bHLH44	PebMYB90	0.981632	1.6e-08	positive
C2C2-Dof13	PebMYB16	0.981515	1.65e-08	positive
HD-ZIP3	PebMYB54	0.98151	1.65e-08	positive
MADS-MIKC12	PebMYB90	0.981466	1.67e-08	positive
GRAS14	PebMYB58	0.981462	1.67e-08	positive
WRKY90	PebMYB49	0.981411	1.69e-08	positive
C2H238	PebMYB58	0.981397	1.7e-08	positive
LOB26	PebMYB81	0.981388	1.71e-08	positive
NAC13	PebMYB49	0.981345	1.72e-08	positive
SBP25	PebMYB174	0.981332	1.73e-08	positive
TCP21	PebMYB57	0.9813	1.75e-08	positive
bHLH17	PebMYB51	0.981292	1.75e-08	positive
WRKY14	PebMYB94	0.981288	1.75e-08	positive
HSF2	PebMYB20	0.981277	1.76e-08	positive
C2H244	PebMYB51	0.981264	1.76e-08	positive
LOB23	PebMYB210	0.981263	1.76e-08	positive
NAC13	PebMYB22	0.981262	1.76e-08	positive
AP2/ERF27	PebMYB6	0.981258	1.76e-08	positive
WRKY61	PebMYB58	0.981254	1.77e-08	positive
AP2/ERF28	PebMYB49	0.981238	1.77e-08	positive
AP2/ERF19	PebMYB6	0.981219	1.78e-08	positive
AP2/ERF118	PebMYB47	0.981213	1.79e-08	positive
AP2/ERF20	PebMYB51	0.981186	1.8e-08	positive
bZIP67	PebMYB1	0.981163	1.81e-08	positive
AP2/ERF20	PebMYB6	0.981134	1.82e-08	positive
AP2/ERF118	PebMYB58	0.981117	1.83e-08	positive
HD-ZIP13	PebMYB38	0.981113	1.83e-08	positive
NAC17	PebMYB19	0.981091	1.84e-08	positive
zf-HD8	PebMYB80	0.98108	1.85e-08	positive
AP2/ERF98	PebMYB6	0.981067	1.86e-08	positive
bZIP32	PebMYB43	0.981059	1.86e-08	positive
bHLH47	PebMYB47	0.98099	1.89e-08	positive
GARP60	PebMYB90	0.98097	1.9e-08	positive
SBP23	PebMYB94	0.980969	1.9e-08	positive
NAC8	PebMYB121	0.980966	1.91e-08	positive
GARP42	PebMYB172	0.98096	1.91e-08	positive
bZIP42	PebMYB94	0.980901	1.94e-08	positive
HB-other13	PebMYB80	0.980844	1.97e-08	positive
HSF20	PebMYB58	0.980839	1.97e-08	positive
GRAS11	PebMYB58	0.98081	1.98e-08	positive
bZIP24	PebMYB117	0.980799	1.99e-08	positive
NF-YA3	PebMYB113	0.980782	2e-08	positive
NF-YA3	PebMYB13	0.980773	2e-08	positive
bHLH103	PebMYB82	0.980756	2.01e-08	positive
OFP5	PebMYB212	0.980736	2.02e-08	positive
AP2/ERF23	PebMYB51	0.980733	2.02e-08	positive
bHLH43	PebMYB68	0.980714	2.03e-08	positive
LOB22	PebMYB16	0.980702	2.04e-08	positive
HSF11	PebMYB19	0.980676	2.05e-08	positive
bHLH13	PebMYB212	0.980671	2.06e-08	positive
C2C2-CO8	PebMYB174	0.980665	2.06e-08	positive
LOB12	PebMYB78	0.980654	2.07e-08	positive
C2H221	PebMYB57	0.980592	2.1e-08	positive
GARP60	PebMYB144	0.98058	2.11e-08	positive
AP2/ERF33	PebMYB49	0.98057	2.11e-08	positive
NAC71	PebMYB218	0.98054	2.13e-08	positive
HB-BELL20	PebMYB158	0.980537	2.13e-08	positive
GRAS14	PebMYB30	0.980535	2.13e-08	positive
NAC13	PebMYB51	0.980533	2.13e-08	positive
NAC34	PebMYB91	0.980497	2.15e-08	positive
C2H222	PebMYB19	0.980486	2.16e-08	positive
C2H228	PebMYB47	0.980443	2.18e-08	positive
GARP10	PebMYB97	0.980441	2.18e-08	positive
HSF11	PebMYB4	0.980439	2.18e-08	positive
HD-ZIP59	PebMYB38	0.980438	2.18e-08	positive
HD-ZIP41	PebMYB54	0.980436	2.18e-08	positive
C2C2-Dof31	PebMYB38	0.980412	2.2e-08	positive
C3H11	PebMYB3R3	0.980396	2.21e-08	positive
LOB25	PebMYB33	0.980369	2.22e-08	positive
HD-ZIP10	PebMYB54	0.980321	2.25e-08	positive
HD-ZIP9	PebMYB54	0.980313	2.25e-08	positive
HSF25	PebMYB13	0.98029	2.27e-08	positive
C2C2-Dof18	PebMYB117	0.980271	2.28e-08	positive
bHLH10	PebMYB144	0.980179	2.33e-08	positive
LOB2	PebMYB210	0.980162	2.34e-08	positive
AP2/ERF86	PebMYB16	0.980145	2.35e-08	positive
LOB15	PebMYB94	0.980111	2.37e-08	positive
AP2/ERF86	PebMYB58	0.980087	2.38e-08	positive
C2C2-YABBY5	PebMYB96	-0.98005	2.41e-08	negative
bHLH66	PebMYB147	0.979994	2.44e-08	positive
AP2/ERF57	PebMYB13	0.979986	2.45e-08	positive
bHLH50	PebMYB121	0.979957	2.46e-08	positive
MADS-MIKC10	PebMYB88	0.979925	2.48e-08	positive
C2H24	PebMYB58	0.979919	2.49e-08	positive
WRKY11	PebMYB88	0.979865	2.52e-08	positive
HD-ZIP52	PebMYB42	0.979851	2.53e-08	positive
bZIP44	PebMYB144	0.979813	2.55e-08	positive
bHLH101	PebMYB144	0.979809	2.55e-08	positive
C2H24	PebMYB86	0.979756	2.59e-08	positive
HB-BELL1	PebMYB212	0.979753	2.59e-08	positive
HB-other10	PebMYB94	0.979749	2.59e-08	positive
C2C2-Dof14	PebMYB4	0.979717	2.61e-08	positive
SBP25	PebMYB54	0.979701	2.62e-08	positive
bHLH79	PebMYB202	0.979651	2.66e-08	positive
bHLH61	PebMYB78	0.97964	2.66e-08	positive
AP2/ERF38	PebMYB173	-0.979603	2.69e-08	negative
C2H296	PebMYB20	0.979593	2.69e-08	positive
MADS-MIKC3	PebMYB30	0.979575	2.71e-08	positive
zf-HD15	PebMYB38	0.979501	2.75e-08	positive
C2C2-Dof2	PebMYB19	0.979492	2.76e-08	positive
bHLH100	PebMYB165	0.979474	2.77e-08	positive
HSF18	PebMYB60	0.979457	2.78e-08	positive
C2H232	PebMYB42	0.979445	2.79e-08	positive
bHLH107	PebMYB36	0.979437	2.8e-08	positive
RWP-RK4	PebMYB13	0.979395	2.83e-08	positive
NF-YA3	PebMYB94	0.979376	2.84e-08	positive
C3H31	PebMYB190	0.979339	2.86e-08	positive
HSF4	PebMYB30	0.97932	2.88e-08	positive
bZIP67	PebMYB51	0.979313	2.88e-08	positive
HSF14	PebMYB94	0.979312	2.88e-08	positive
bHLH105	PebMYB125	0.9793	2.89e-08	positive
LOB4	PebMYB34	0.979297	2.89e-08	positive
GRAS11	PebMYB30	0.979282	2.9e-08	positive
C2C2-Dof1	PebMYB96	-0.979281	2.9e-08	negative
AP2/ERF28	PebMYB6	0.979241	2.93e-08	positive
NAC63	PebMYB14	0.97923	2.94e-08	positive
RWP-RK4	PebMYB94	0.979225	2.94e-08	positive
C2H24	PebMYB83	0.979214	2.95e-08	positive
NAC64	PebMYB30	0.979202	2.96e-08	positive
bZIP2	PebMYB49	0.979178	2.98e-08	positive
GARP60	PebMYB94	0.979172	2.98e-08	positive
HB-BELL22	PebMYB216	-0.979149	3e-08	negative
C2C2-Dof13	PebMYB47	0.97912	3.02e-08	positive
C2H222	PebMYB69	0.979088	3.04e-08	positive
HSF4	PebMYB58	0.979061	3.06e-08	positive
C2H266	PebMYB68	0.979033	3.08e-08	positive
GRAS51	PebMYB58	0.979027	3.09e-08	positive
bZIP43	PebMYB3R5	0.979006	3.1e-08	positive
WRKY45	PebMYB49	0.978964	3.13e-08	positive
C2C2-Dof20	PebMYB173	-0.978942	3.15e-08	negative
SBP10	PebMYB16	0.978933	3.15e-08	positive
WRKY67	PebMYB117	0.978918	3.17e-08	positive
HD-ZIP59	PebMYB68	0.978908	3.17e-08	positive
C2H279	PebMYB49	0.978897	3.18e-08	positive
MADS-MIKC22	PebMYB30	0.978849	3.22e-08	positive
TCP34	PebMYB82	0.978817	3.24e-08	positive
WRKY90	PebMYB101	0.978789	3.26e-08	positive
bZIP73	PebMYB80	0.978775	3.27e-08	positive
WRKY27	PebMYB6	0.978774	3.27e-08	positive
HSF23	PebMYB58	0.978757	3.29e-08	positive
OFP7	PebMYB86	0.978694	3.34e-08	positive
GRAS51	PebMYB16	0.97869	3.34e-08	positive
AP2/ERF104	PebMYB13	0.978683	3.34e-08	positive
HSF25	PebMYB94	0.978673	3.35e-08	positive
C2C2-Dof44	PebMYB13	0.978642	3.38e-08	positive
bZIP73	PebMYB90	0.978625	3.39e-08	positive
LOB26	PebMYB122	0.978611	3.4e-08	positive
AP2/ERF72	PebMYB88	0.978579	3.43e-08	positive
GARP60	PebMYB113	0.978543	3.46e-08	positive
bZIP81	PebMYB30	0.978517	3.48e-08	positive
AP2/ERF129	PebMYB20	0.978452	3.53e-08	positive
C2H232	PebMYB172	0.978439	3.54e-08	positive
HSF2	PebMYB49	0.978385	3.58e-08	positive
HD-ZIP12	PebMYB42	0.978367	3.6e-08	positive
GRAS4	PebMYB90	0.978342	3.62e-08	positive
GRAS5	PebMYB58	0.978305	3.65e-08	positive
bHLH44	PebMYB16	0.978304	3.65e-08	positive
bZIP44	PebMYB80	0.978276	3.67e-08	positive
WRKY92	PebMYB49	0.97827	3.68e-08	positive
GRAS10	PebMYB47	0.978242	3.7e-08	positive
C2C2-Dof37	PebMYB40	0.97824	3.7e-08	positive
AP2/ERF119	PebMYB47	0.97824	3.7e-08	positive
AP2/ERF86	PebMYB88	0.978226	3.72e-08	positive
bZIP42	PebMYB13	0.978188	3.75e-08	positive
bZIP13	PebMYB97	0.978183	3.75e-08	positive
C2C2-Dof14	PebMYB13	0.978166	3.77e-08	positive
AP2/ERF72	PebMYB58	0.978156	3.78e-08	positive
AP2/ERF124	PebMYB51	0.978144	3.79e-08	positive
WRKY14	PebMYB90	0.978132	3.8e-08	positive
NAC13	PebMYB1	0.978112	3.81e-08	positive
GRAS29	PebMYB80	0.978076	3.84e-08	positive
AP2/ERF30	PebMYB51	0.977956	3.95e-08	positive
GRAS9	PebMYB94	0.977914	3.99e-08	positive
C2H244	PebMYB49	0.97782	4.07e-08	positive
WRKY66	PebMYB13	0.977796	4.1e-08	positive
HB-other13	PebMYB94	0.977788	4.1e-08	positive
Trihelix9	PebMYB140	0.977783	4.11e-08	positive
LOB4	PebMYB91	0.977771	4.12e-08	positive
Tify9	PebMYB47	0.97773	4.16e-08	positive
SBP24	PebMYB58	0.977708	4.18e-08	positive
bHLH44	PebMYB30	0.977685	4.2e-08	positive
bZIP44	PebMYB13	0.977683	4.2e-08	positive
TUB13	PebMYB155	0.977667	4.21e-08	positive
NAC32	PebMYB13	0.977661	4.22e-08	positive
GRAS9	PebMYB90	0.977622	4.26e-08	positive
C2H273	PebMYB51	0.977618	4.26e-08	positive
bHLH63	PebMYB57	0.977598	4.28e-08	positive
WRKY33	PebMYB80	0.977593	4.28e-08	positive
C2C2-GATA22	PebMYB49	0.97758	4.3e-08	positive
RWP-RK9	PebMYB80	0.977528	4.35e-08	positive
GARP21	PebMYB19	0.977511	4.36e-08	positive
WRKY26	PebMYB51	0.977489	4.38e-08	positive
B356	PebMYB34	0.977448	4.42e-08	positive
NAC20	PebMYB16	0.977429	4.44e-08	positive
AP2/ERF124	PebMYB1	0.977424	4.45e-08	positive
Tify17	PebMYB13	0.977378	4.49e-08	positive
HSF21	PebMYB19	0.977348	4.52e-08	positive
AP2/ERF17	PebMYB51	0.977318	4.55e-08	positive
GRAS40	PebMYB51	0.97731	4.56e-08	positive
AP2/ERF74	PebMYB165	0.977308	4.56e-08	positive
C2H226	PebMYB64	0.977265	4.6e-08	positive
AP2/ERF21	PebMYB51	0.977264	4.61e-08	positive
C2C2-GATA4	PebMYB203	0.977261	4.61e-08	positive
AP2/ERF25	PebMYB38	0.977259	4.61e-08	positive
C2H210	PebMYB177	0.977189	4.68e-08	positive
C2H28	PebMYB4	0.977174	4.7e-08	positive
C2H282	PebMYB90	0.977161	4.71e-08	positive
WRKY20	PebMYB13	0.977158	4.71e-08	positive
MADS-MIKC4	PebMYB177	0.977129	4.74e-08	positive
HB-BELL17	PebMYB68	0.977073	4.8e-08	positive
TCP5	PebMYB78	0.977005	4.87e-08	positive
WRKY60	PebMYB30	0.977004	4.87e-08	positive
bHLH71	PebMYB165	0.976997	4.88e-08	positive
GRAS9	PebMYB13	0.976995	4.88e-08	positive
C2C2-Dof18	PebMYB90	0.976992	4.89e-08	positive
NF-YB8	PebMYB88	0.976987	4.89e-08	positive
C2H226	PebMYB43	0.976964	4.92e-08	positive
AP2/ERF63	PebMYB97	0.976946	4.93e-08	positive
GRAS51	PebMYB64	0.976933	4.95e-08	positive
NAC34	PebMYB58	0.976931	4.95e-08	positive
LOB22	PebMYB58	0.976914	4.97e-08	positive
RWP-RK4	PebMYB113	0.976909	4.97e-08	positive
MADS-M-type6	PebMYB80	0.976863	5.02e-08	positive
HSF25	PebMYB113	0.976839	5.05e-08	positive
C2H238	PebMYB88	0.976819	5.07e-08	positive
AP2/ERF22	PebMYB42	0.976813	5.08e-08	positive
HSF5	PebMYB88	0.9768	5.09e-08	positive
GARP17	PebMYB80	0.976781	5.11e-08	positive
bZIP67	PebMYB49	0.97677	5.12e-08	positive
NF-YA9	PebMYB49	0.976738	5.16e-08	positive
HB-WOX6	PebMYB4	0.976732	5.17e-08	positive
AP2/ERF30	PebMYB49	0.97673	5.17e-08	positive
bHLH71	PebMYB173	-0.976725	5.17e-08	negative
C3H11	PebMYB210	0.976692	5.21e-08	positive
C2H29	PebMYB51	0.976668	5.24e-08	positive
GARP52	PebMYB47	0.976635	5.27e-08	positive
HSF4	PebMYB47	0.976634	5.27e-08	positive
OFP6	PebMYB58	0.976584	5.33e-08	positive
HB-BELL10	PebMYB214	0.976565	5.35e-08	positive
AP2/ERF122	PebMYB47	0.976561	5.36e-08	positive
HSF11	PebMYB16	0.976545	5.38e-08	positive
B36	PebMYB174	0.976503	5.42e-08	positive
bHLH44	PebMYB4	0.976481	5.45e-08	positive
bZIP32	PebMYB34	0.97647	5.46e-08	positive
DDT8	PebMYB3R5	0.976468	5.46e-08	positive
C2H240	PebMYB13	0.976457	5.48e-08	positive
LOB22	PebMYB177	0.976331	5.62e-08	positive
HD-ZIP22	PebMYB58	0.976316	5.64e-08	positive
MADS-MIKC4	PebMYB58	0.976288	5.67e-08	positive
C2H247	PebMYB68	0.976275	5.69e-08	positive
GRAS21	PebMYB19	0.976267	5.7e-08	positive
HSF16	PebMYB177	0.976254	5.71e-08	positive
WRKY9	PebMYB49	0.976232	5.74e-08	positive
C2H238	PebMYB19	0.976211	5.77e-08	positive
bHLH47	PebMYB15	0.976198	5.78e-08	positive
bZIP52	PebMYB179	0.976192	5.79e-08	positive
C2C2-Dof2	PebMYB16	0.976156	5.83e-08	positive
AP2/ERF119	PebMYB19	0.976145	5.85e-08	positive
MADS-MIKC22	PebMYB58	0.976136	5.86e-08	positive
MADS-M-type6	PebMYB106	0.976112	5.89e-08	positive
WRKY34	PebMYB54	0.976103	5.9e-08	positive
NF-YA9	PebMYB20	0.976021	6e-08	positive
AP2/ERF30	PebMYB47	0.975989	6.04e-08	positive
HB-other13	PebMYB90	0.975972	6.06e-08	positive
zf-HD3	PebMYB154	0.975928	6.11e-08	positive
C2H222	PebMYB16	0.975925	6.12e-08	positive
NAC37	PebMYB71	0.975922	6.12e-08	positive
C2C2-Dof41	PebMYB4	0.975906	6.14e-08	positive
MADS-MIKC22	PebMYB4	0.975878	6.18e-08	positive
SBP2	PebMYB155	-0.97585	6.21e-08	negative
NAC20	PebMYB47	0.975845	6.22e-08	positive
HSF5	PebMYB58	0.975832	6.24e-08	positive
WRKY21	PebMYB111	-0.975789	6.29e-08	negative
WRKY69	PebMYB144	0.975776	6.31e-08	positive
bZIP67	PebMYB88	0.975762	6.33e-08	positive
bHLH8	PebMYB4	0.975735	6.36e-08	positive
NF-YA9	PebMYB1	0.975712	6.39e-08	positive
C2H247	PebMYB38	0.975711	6.39e-08	positive
HB-WOX6	PebMYB215	-0.975684	6.43e-08	negative
NAC17	PebMYB30	0.975664	6.45e-08	positive
bHLH101	PebMYB13	0.975617	6.52e-08	positive
bHLH8	PebMYB13	0.975581	6.56e-08	positive
WRKY7	PebMYB3R5	0.97557	6.58e-08	positive
HD-ZIP44	PebMYB42	0.975554	6.6e-08	positive
C2H24	PebMYB16	0.975515	6.65e-08	positive
NAC34	PebMYB43	0.975514	6.65e-08	positive
SBP23	PebMYB90	0.97544	6.75e-08	positive
C2H286	PebMYB13	0.975436	6.76e-08	positive
HD-ZIP9	PebMYB121	0.97543	6.77e-08	positive
ULT1	PebMYB33	0.975426	6.77e-08	positive
AP2/ERF124	PebMYB20	0.975425	6.77e-08	positive
MADS-MIKC17	PebMYB174	0.975417	6.78e-08	positive
C2H286	PebMYB30	0.975406	6.8e-08	positive
C2C2-Dof44	PebMYB90	0.975361	6.86e-08	positive
GRAS51	PebMYB43	0.97534	6.89e-08	positive
Trihelix29	PebMYB47	0.975334	6.9e-08	positive
C2C2-CO6	PebMYB159	0.975311	6.93e-08	positive
AP2/ERF104	PebMYB144	0.975296	6.95e-08	positive
HSF9	PebMYB34	0.975253	7.01e-08	positive
SBP2	PebMYB165	0.975253	7.01e-08	positive
BES113	PebMYB54	0.975233	7.04e-08	positive
zf-HD10	PebMYB174	0.975232	7.04e-08	positive
WRKY65	PebMYB19	0.975217	7.06e-08	positive
GRAS9	PebMYB144	0.975203	7.08e-08	positive
B38	PebMYB1	0.975167	7.13e-08	positive
Tify10	PebMYB3R5	0.975156	7.15e-08	positive
WRKY17	PebMYB69	0.975111	7.21e-08	positive
NAC13	PebMYB6	0.975081	7.26e-08	positive
MADS-MIKC22	PebMYB90	0.975069	7.28e-08	positive
NAC6	PebMYB43	0.975065	7.28e-08	positive
OFP6	PebMYB19	0.975055	7.3e-08	positive
AP2/ERF71	PebMYB190	0.975048	7.31e-08	positive
SBP23	PebMYB13	0.975045	7.31e-08	positive
AP2/ERF23	PebMYB49	0.975035	7.32e-08	positive
HB-KNOX6	PebMYB207	0.975014	7.35e-08	positive
C2H226	PebMYB91	0.974997	7.38e-08	positive
AP2/ERF115	PebMYB101	0.974987	7.39e-08	positive
C2C2-Dof1	PebMYB172	0.974983	7.4e-08	positive
bZIP35	PebMYB58	0.974906	7.51e-08	positive
AP2/ERF86	PebMYB19	0.974839	7.61e-08	positive
GARP17	PebMYB106	0.974839	7.61e-08	positive
bHLH76	PebMYB173	-0.974829	7.63e-08	negative
HD-ZIP17	PebMYB174	0.974827	7.63e-08	positive
HSF4	PebMYB15	0.974781	7.7e-08	positive
GARP11	PebMYB111	0.974768	7.72e-08	positive
HD-ZIP26	PebMYB172	0.974767	7.72e-08	positive
HSF9	PebMYB51	0.97476	7.73e-08	positive
MADS-MIKC10	PebMYB15	0.974757	7.74e-08	positive
LOB9	PebMYB1	0.97473	7.78e-08	positive
NAC32	PebMYB4	0.974713	7.81e-08	positive
HSF20	PebMYB177	0.974699	7.83e-08	positive
HSF13	PebMYB173	-0.97467	7.87e-08	negative
C2H24	PebMYB19	0.974634	7.93e-08	positive
GRAS35	PebMYB97	0.974599	7.98e-08	positive
HD-ZIP13	PebMYB68	0.974585	8e-08	positive
C2H233	PebMYB15	0.974514	8.11e-08	positive
AP2/ERF22	PebMYB121	0.974498	8.14e-08	positive
HB-other10	PebMYB113	0.974493	8.15e-08	positive
MADS-MIKC10	PebMYB47	0.974453	8.21e-08	positive
TCP19	PebMYB113	0.974447	8.22e-08	positive
C2H210	PebMYB16	0.974439	8.23e-08	positive
HD-ZIP12	PebMYB174	0.974418	8.27e-08	positive
NAC35	PebMYB214	0.974418	8.27e-08	positive
DDT2	PebMYB10	0.974415	8.27e-08	positive
MADS-MIKC3	PebMYB16	0.9744	8.3e-08	positive
GARP9	PebMYB47	0.974399	8.3e-08	positive
TCP14	PebMYB155	-0.974301	8.46e-08	negative
Alfin2	PebMYB165	0.974285	8.48e-08	positive
AP2/ERF57	PebMYB144	0.974266	8.51e-08	positive
WRKY60	PebMYB4	0.974241	8.55e-08	positive
HD-ZIP3	PebMYB121	0.974221	8.59e-08	positive
GRAS51	PebMYB60	0.9742	8.62e-08	positive
bHLH71	PebMYB147	0.974199	8.62e-08	positive
GRAS30	PebMYB1	0.974139	8.72e-08	positive
B360	PebMYB193	0.974078	8.83e-08	positive
AP2/ERF30	PebMYB6	0.974073	8.83e-08	positive
LOB4	PebMYB64	0.974071	8.84e-08	positive
WRKY60	PebMYB16	0.974067	8.84e-08	positive
C2H28	PebMYB86	0.97405	8.87e-08	positive
C2C2-Dof44	PebMYB113	0.974035	8.9e-08	positive
AP2/ERF108	PebMYB51	0.974005	8.95e-08	positive
GRAS10	PebMYB19	0.973995	8.97e-08	positive
OFP7	PebMYB69	0.973976	9e-08	positive
AP2/ERF35	PebMYB47	0.973957	9.03e-08	positive
AP2/ERF119	PebMYB58	0.973955	9.03e-08	positive
C2C2-Dof9	PebMYB172	0.973953	9.04e-08	positive
GARP42	PebMYB212	0.973928	9.08e-08	positive
C2C2-Dof40	PebMYB190	0.973898	9.13e-08	positive
GARP49	PebMYB216	-0.973897	9.14e-08	negative
C2C2-CO8	PebMYB42	0.973866	9.19e-08	positive
bHLH63	PebMYB214	0.973801	9.3e-08	positive
C2C2-Dof41	PebMYB94	0.973742	9.41e-08	positive
WRKY5	PebMYB40	0.973696	9.49e-08	positive
C2H233	PebMYB43	0.973682	9.51e-08	positive
C2C2-YABBY4	PebMYB42	0.973656	9.56e-08	positive
TCP5	PebMYB121	0.973656	9.56e-08	positive
HSF12	PebMYB51	0.973655	9.56e-08	positive
C2H233	PebMYB47	0.973626	9.62e-08	positive
WRKY72	PebMYB19	0.97361	9.64e-08	positive
GARP42	PebMYB78	0.973577	9.7e-08	positive
AP2/ERF98	PebMYB49	0.973557	9.74e-08	positive
zf-HD8	PebMYB13	0.973551	9.75e-08	positive
HD-ZIP50	PebMYB54	0.973499	9.85e-08	positive
SBP24	PebMYB90	0.973456	9.93e-08	positive
LOB21	PebMYB3R3	0.973435	9.97e-08	positive
zf-HD5	PebMYB47	0.973417	1e-07	positive
C2H252	PebMYB57	0.973347	1.01e-07	positive
C2C2-CO13	PebMYB216	-0.973347	1.01e-07	negative
AP2/ERF119	PebMYB88	0.973274	1.03e-07	positive
C2H228	PebMYB16	0.973181	1.04e-07	positive
C2H222	PebMYB58	0.973171	1.05e-07	positive
NAC34	PebMYB19	0.973162	1.05e-07	positive
OFP6	PebMYB47	0.973159	1.05e-07	positive
HD-ZIP9	PebMYB174	0.973158	1.05e-07	positive
HB-KNOX11	PebMYB173	-0.97315	1.05e-07	negative
bZIP82	PebMYB177	0.973114	1.06e-07	positive
C2H28	PebMYB83	0.97311	1.06e-07	positive
C2C2-GATA22	PebMYB51	0.973103	1.06e-07	positive
HB-other10	PebMYB144	0.973101	1.06e-07	positive
WRKY16	PebMYB30	0.973101	1.06e-07	positive
B335	PebMYB4	0.97306	1.07e-07	positive
GRAS36	PebMYB153	0.973055	1.07e-07	positive
SBP2	PebMYB173	-0.972953	1.09e-07	negative
bHLH47	PebMYB58	0.972904	1.1e-07	positive
B39	PebMYB216	0.9729	1.1e-07	positive
GRAS11	PebMYB177	0.972877	1.1e-07	positive
WRKY5	PebMYB19	0.972845	1.11e-07	positive
Trihelix4	PebMYB140	0.972808	1.12e-07	positive
NAC47	PebMYB91	0.972807	1.12e-07	positive
WRKY67	PebMYB94	0.972799	1.12e-07	positive
WRKY33	PebMYB13	0.972771	1.13e-07	positive
WRKY14	PebMYB215	-0.972742	1.13e-07	negative
NAC32	PebMYB113	0.972726	1.14e-07	positive
AP2/ERF72	PebMYB19	0.972713	1.14e-07	positive
bZIP82	PebMYB16	0.972713	1.14e-07	positive
GRAS35	PebMYB177	0.972702	1.14e-07	positive
NF-YA11	PebMYB113	0.972697	1.14e-07	positive
WRKY10	PebMYB106	0.972682	1.14e-07	positive
AP2/ERF81	PebMYB179	0.972675	1.15e-07	positive
PLATZ2	PebMYB165	-0.972668	1.15e-07	negative
C2H282	PebMYB94	0.972664	1.15e-07	positive
WRKY46	PebMYB165	0.972643	1.15e-07	positive
GARP20	PebMYB122	0.972634	1.15e-07	positive
GRAS48	PebMYB215	-0.972626	1.16e-07	negative
GRAS24	PebMYB177	0.972624	1.16e-07	positive
WRKY36	PebMYB71	0.972582	1.17e-07	positive
WRKY14	PebMYB16	0.972572	1.17e-07	positive
C2C2-GATA24	PebMYB143	0.972542	1.17e-07	positive
bZIP52	PebMYB71	0.972542	1.17e-07	positive
HB-other12	PebMYB113	0.972521	1.18e-07	positive
HSF9	PebMYB1	0.972519	1.18e-07	positive
AP2/ERF16	PebMYB86	0.97251	1.18e-07	positive
HSF16	PebMYB16	0.972432	1.2e-07	positive
Tify17	PebMYB94	0.972419	1.2e-07	positive
GRAS51	PebMYB86	0.972298	1.23e-07	positive
GRAS22	PebMYB33	0.972293	1.23e-07	positive
C2H25	PebMYB38	0.972259	1.23e-07	positive
bZIP32	PebMYB19	0.972232	1.24e-07	positive
bZIP44	PebMYB94	0.97221	1.25e-07	positive
HD-ZIP26	PebMYB212	0.972206	1.25e-07	positive
bZIP67	PebMYB6	0.972171	1.25e-07	positive
bHLH8	PebMYB215	-0.972156	1.26e-07	negative
GRAS30	PebMYB15	0.972144	1.26e-07	positive
WRKY15	PebMYB114	0.97211	1.27e-07	positive
NF-YC7	PebMYB197	0.972105	1.27e-07	positive
NAC20	PebMYB88	0.972082	1.27e-07	positive
C2H230	PebMYB96	-0.972063	1.28e-07	negative
B364	PebMYB53	0.97202	1.29e-07	positive
zf-HD10	PebMYB38	0.971995	1.29e-07	positive
HD-ZIP16	PebMYB87	0.971985	1.3e-07	positive
AP2/ERF79	PebMYB90	0.971959	1.3e-07	positive
B364	PebMYB13	0.971958	1.3e-07	positive
HD-ZIP35	PebMYB212	0.971934	1.31e-07	positive
C2C2-Dof44	PebMYB30	0.971896	1.32e-07	positive
bZIP2	PebMYB20	0.971892	1.32e-07	positive
SBP12	PebMYB54	0.971858	1.33e-07	positive
C2H226	PebMYB4	0.971842	1.33e-07	positive
AP2/ERF20	PebMYB49	0.971809	1.34e-07	positive
LOB6	PebMYB70	0.971726	1.36e-07	positive
C2H268	PebMYB57	0.971707	1.36e-07	positive
SBP25	PebMYB121	0.971704	1.36e-07	positive
AP2/ERF16	PebMYB69	0.971686	1.37e-07	positive
LOB12	PebMYB121	0.971684	1.37e-07	positive
GRAS14	PebMYB4	0.971681	1.37e-07	positive
GARP5	PebMYB69	0.971645	1.38e-07	positive
HD-ZIP44	PebMYB121	0.97164	1.38e-07	positive
HD-ZIP50	PebMYB14	0.971625	1.38e-07	positive
GRAS24	PebMYB58	0.971609	1.39e-07	positive
WRKY35	PebMYB80	0.971608	1.39e-07	positive
bZIP32	PebMYB16	0.971606	1.39e-07	positive
C2H224	PebMYB90	0.971519	1.41e-07	positive
C2C2-YABBY5	PebMYB172	0.971424	1.43e-07	positive
bHLH10	PebMYB113	0.971409	1.43e-07	positive
C2C2-YABBY6	PebMYB42	0.971405	1.44e-07	positive
bHLH85	PebMYB54	0.971377	1.44e-07	positive
zf-HD16	PebMYB52	0.971364	1.45e-07	positive
C2H230	PebMYB57	0.971333	1.45e-07	positive
C2H264	PebMYB94	0.971285	1.47e-07	positive
bHLH47	PebMYB88	0.971228	1.48e-07	positive
AP2/ERF87	PebMYB88	0.971177	1.49e-07	positive
bZIP6	PebMYB80	0.971151	1.5e-07	positive
bZIP22	PebMYB87	0.971136	1.5e-07	positive
HSF14	PebMYB16	0.971124	1.51e-07	positive
AP2/ERF98	PebMYB20	0.971074	1.52e-07	positive
MADS-MIKC12	PebMYB94	0.971067	1.52e-07	positive
Trihelix29	PebMYB4	0.971005	1.54e-07	positive
WRKY21	PebMYB173	-0.971004	1.54e-07	negative
HD-ZIP52	PebMYB174	0.970994	1.54e-07	positive
bHLH47	PebMYB30	0.970983	1.54e-07	positive
LOB12	PebMYB42	0.970979	1.54e-07	positive
GRAS50	PebMYB113	0.97093	1.56e-07	positive
bZIP66	PebMYB194	0.970925	1.56e-07	positive
GRAS51	PebMYB91	0.97089	1.57e-07	positive
GARP11	PebMYB158	-0.970886	1.57e-07	negative
AP2/ERF21	PebMYB6	0.970877	1.57e-07	positive
NAC14	PebMYB113	0.970857	1.58e-07	positive
C2H226	PebMYB60	0.970814	1.59e-07	positive
AP2/ERF118	PebMYB19	0.97079	1.59e-07	positive
bHLH12	PebMYB80	0.970782	1.6e-07	positive
bHLH66	PebMYB179	0.970771	1.6e-07	positive
GRAS4	PebMYB177	0.970737	1.61e-07	positive
GRAS40	PebMYB49	0.970736	1.61e-07	positive
zf-HD8	PebMYB106	0.97072	1.61e-07	positive
C2C2-Dof39	PebMYB4	0.970691	1.62e-07	positive
TCP35	PebMYB177	0.970679	1.62e-07	positive
AP2/ERF33	PebMYB6	0.970615	1.64e-07	positive
WRKY33	PebMYB144	0.970544	1.66e-07	positive
GRAS54	PebMYB125	0.970521	1.67e-07	positive
AP2/ERF22	PebMYB174	0.970474	1.68e-07	positive
C2C2-Dof13	PebMYB88	0.970467	1.68e-07	positive
HSF9	PebMYB88	0.97046	1.69e-07	positive
WRKY61	PebMYB19	0.970416	1.7e-07	positive
HB-BELL6	PebMYB71	0.9704	1.7e-07	positive
MADS-MIKC18	PebMYB33	0.970391	1.71e-07	positive
WRKY90	PebMYB22	0.970371	1.71e-07	positive
HD-ZIP51	PebMYB19	0.970369	1.71e-07	positive
C3H81	PebMYB203	0.970359	1.71e-07	positive
GRAS29	PebMYB144	0.970304	1.73e-07	positive
GRAS5	PebMYB16	0.970275	1.74e-07	positive
C2H28	PebMYB66	0.970265	1.74e-07	positive
B335	PebMYB69	0.97026	1.74e-07	positive
bZIP81	PebMYB47	0.970233	1.75e-07	positive
AP2/ERF93	PebMYB67	0.970219	1.76e-07	positive
C2H267	PebMYB172	0.970212	1.76e-07	positive
WRKY17	PebMYB97	0.970186	1.76e-07	positive
NAC20	PebMYB15	0.970184	1.77e-07	positive
C2C2-Dof14	PebMYB144	0.970173	1.77e-07	positive
C2C2-Dof1	PebMYB78	0.970159	1.77e-07	positive
Trihelix38	PebMYB71	0.970154	1.77e-07	positive
WRKY68	PebMYB222	0.970118	1.78e-07	positive
C3H21	PebMYB62	0.970111	1.79e-07	positive
GARP19	PebMYB13	0.970103	1.79e-07	positive
GRAS24	PebMYB90	0.970083	1.79e-07	positive
AP2/ERF124	PebMYB49	0.970058	1.8e-07	positive
HSF26	PebMYB47	0.970055	1.8e-07	positive
WRKY60	PebMYB94	0.970044	1.81e-07	positive
C2C2-Dof39	PebMYB3R5	0.97003	1.81e-07	positive
BES112	PebMYB97	0.969995	1.82e-07	positive
zf-HD5	PebMYB19	0.969994	1.82e-07	positive
C2C2-CO17	PebMYB96	-0.96999	1.82e-07	negative
TCP34	PebMYB57	0.969981	1.83e-07	positive
C2H210	PebMYB58	0.969951	1.83e-07	positive
HD-ZIP35	PebMYB121	0.969947	1.84e-07	positive
NAC15	PebMYB40	0.969941	1.84e-07	positive
HSF23	PebMYB47	0.969922	1.84e-07	positive
NAC16	PebMYB16	0.969922	1.84e-07	positive
bZIP81	PebMYB19	0.969914	1.85e-07	positive
LOB24	PebMYB51	0.969897	1.85e-07	positive
HD-ZIP12	PebMYB38	0.969889	1.85e-07	positive
GRAS11	PebMYB16	0.969863	1.86e-07	positive
HSF5	PebMYB19	0.969826	1.87e-07	positive
C2C2-YABBY7	PebMYB14	0.969821	1.87e-07	positive
NAC6	PebMYB86	0.969809	1.88e-07	positive
HSF4	PebMYB19	0.96979	1.88e-07	positive
C2H249	PebMYB1	0.969787	1.88e-07	positive
HD-ZIP9	PebMYB42	0.969785	1.89e-07	positive
LOB15	PebMYB13	0.969739	1.9e-07	positive
LOB24	PebMYB49	0.969691	1.91e-07	positive
HB-other10	PebMYB80	0.96967	1.92e-07	positive
C2C2-Dof41	PebMYB58	0.969657	1.93e-07	positive
HSF11	PebMYB58	0.969649	1.93e-07	positive
AP2/ERF73	PebMYB82	0.969594	1.94e-07	positive
C3H72	PebMYB49	0.969565	1.95e-07	positive
NAC47	PebMYB64	0.96952	1.97e-07	positive
AP2/ERF72	PebMYB43	0.969498	1.98e-07	positive
RWP-RK4	PebMYB144	0.969409	2e-07	positive
AP2/ERF34	PebMYB179	0.969391	2.01e-07	positive
HD-ZIP3	PebMYB42	0.969388	2.01e-07	positive
WRKY32	PebMYB91	0.969361	2.02e-07	positive
WRKY60	PebMYB215	-0.969344	2.03e-07	negative
bZIP70	PebMYB86	0.969338	2.03e-07	positive
zf-HD10	PebMYB42	0.969324	2.03e-07	positive
NAC32	PebMYB144	0.969315	2.03e-07	positive
NAC32	PebMYB215	-0.969298	2.04e-07	negative
NAC34	PebMYB69	0.969294	2.04e-07	positive
HSF11	PebMYB60	0.969266	2.05e-07	positive
HD-ZIP22	PebMYB19	0.96926	2.05e-07	positive
AP2/ERF30	PebMYB88	0.969247	2.06e-07	positive
C2H210	PebMYB90	0.969247	2.06e-07	positive
TCP14	PebMYB57	-0.969242	2.06e-07	negative
HSF23	PebMYB19	0.969216	2.07e-07	positive
HD-ZIP13	PebMYB54	0.969182	2.08e-07	positive
HSF14	PebMYB58	0.969166	2.08e-07	positive
bHLH44	PebMYB58	0.969152	2.09e-07	positive
HD-ZIP3	PebMYB174	0.96914	2.09e-07	positive
NAC17	PebMYB4	0.969128	2.1e-07	positive
HD-ZIP31	PebMYB140	0.969121	2.1e-07	positive
GRAS14	PebMYB90	0.969083	2.11e-07	positive
C2H29	PebMYB49	0.96906	2.12e-07	positive
HD-ZIP17	PebMYB121	0.969057	2.12e-07	positive
C2H232	PebMYB96	-0.969019	2.13e-07	negative
LOB4	PebMYB60	0.968994	2.14e-07	positive
bZIP81	PebMYB177	0.968945	2.16e-07	positive
GRAS5	PebMYB113	0.968914	2.17e-07	positive
AP2/ERF1	PebMYB4	0.968909	2.17e-07	positive
TUB13	PebMYB173	0.968909	2.17e-07	positive
WRKY27	PebMYB1	0.968885	2.18e-07	positive
GARP52	PebMYB43	0.968872	2.18e-07	positive
HD-ZIP39	PebMYB121	0.968867	2.19e-07	positive
C2C2-Dof9	PebMYB121	0.968863	2.19e-07	positive
WRKY66	PebMYB144	0.968848	2.19e-07	positive
zf-HD16	PebMYB151	0.968823	2.2e-07	positive
bZIP82	PebMYB90	0.968802	2.21e-07	positive
C2C2-Dof39	PebMYB77	0.968785	2.21e-07	positive
bZIP21	PebMYB71	0.968764	2.22e-07	positive
C2H273	PebMYB6	0.968753	2.23e-07	positive
C2H222	PebMYB86	0.968735	2.23e-07	positive
C2C2-Dof39	PebMYB43	0.968734	2.23e-07	positive
AP2/ERF118	PebMYB91	0.96869	2.25e-07	positive
C2H268	PebMYB155	0.968651	2.26e-07	positive
AP2/ERF17	PebMYB1	0.968583	2.29e-07	positive
bHLH10	PebMYB4	0.968565	2.29e-07	positive
GARP5	PebMYB4	0.968563	2.29e-07	positive
GRAS5	PebMYB30	0.968559	2.3e-07	positive
NAC14	PebMYB144	0.968559	2.3e-07	positive
bZIP38	PebMYB86	0.968558	2.3e-07	positive
HD-ZIP8	PebMYB165	0.96854	2.3e-07	positive
WRKY16	PebMYB215	-0.968534	2.3e-07	negative
GARP17	PebMYB13	0.968512	2.31e-07	positive
bZIP82	PebMYB46	0.968502	2.32e-07	positive
NAC14	PebMYB90	0.968447	2.34e-07	positive
C2C2-Dof18	PebMYB13	0.968405	2.35e-07	positive
NAC26	PebMYB13	0.968366	2.37e-07	positive
Tify17	PebMYB80	0.96835	2.37e-07	positive
B365	PebMYB68	0.968313	2.39e-07	positive
NAC21	PebMYB22	0.96831	2.39e-07	positive
SRS4	PebMYB174	0.968293	2.39e-07	positive
RWP-RK1	PebMYB106	0.968291	2.39e-07	positive
bZIP71	PebMYB71	0.968277	2.4e-07	positive
C2H255	PebMYB38	0.968247	2.41e-07	positive
HSF12	PebMYB20	0.968225	2.42e-07	positive
GRAS35	PebMYB30	0.96818	2.44e-07	positive
C2C2-Dof20	PebMYB165	0.968179	2.44e-07	positive
NAC68	PebMYB214	0.968169	2.44e-07	positive
B311	PebMYB23	0.968153	2.45e-07	positive
GRAS11	PebMYB19	0.968145	2.45e-07	positive
TCP35	PebMYB90	0.968139	2.45e-07	positive
C2C2-CO6	PebMYB2	0.968118	2.46e-07	positive
GARP42	PebMYB96	-0.968114	2.46e-07	negative
C2H250	PebMYB158	0.9681	2.47e-07	positive
bHLH7	PebMYB173	-0.968093	2.47e-07	negative
C2C2-Dof1	PebMYB212	0.968073	2.48e-07	positive
C3H53	PebMYB49	0.968064	2.48e-07	positive
HSF4	PebMYB177	0.968043	2.49e-07	positive
TCP10	PebMYB155	-0.967987	2.51e-07	negative
Tify9	PebMYB16	0.967947	2.53e-07	positive
AP2/ERF22	PebMYB87	0.967946	2.53e-07	positive
bHLH44	PebMYB94	0.967862	2.56e-07	positive
GARP52	PebMYB4	0.96785	2.56e-07	positive
HD-ZIP52	PebMYB121	0.967825	2.57e-07	positive
NAC64	PebMYB177	0.967822	2.57e-07	positive
AP2/ERF40	PebMYB177	0.967803	2.58e-07	positive
C2H232	PebMYB24	0.96779	2.59e-07	positive
Tify1	PebMYB3R5	0.967775	2.59e-07	positive
LOB12	PebMYB172	0.967757	2.6e-07	positive
bHLH8	PebMYB144	0.967744	2.61e-07	positive
C2H233	PebMYB64	0.967727	2.61e-07	positive
HSF25	PebMYB80	0.967707	2.62e-07	positive
B36	PebMYB78	0.967695	2.62e-07	positive
AP2/ERF80	PebMYB51	0.967669	2.64e-07	positive
HSF25	PebMYB30	0.967659	2.64e-07	positive
NAC29	PebMYB222	0.967598	2.66e-07	positive
TCP35	PebMYB113	0.967592	2.67e-07	positive
HB-BELL20	PebMYB173	-0.967586	2.67e-07	negative
C2C2-YABBY5	PebMYB42	0.967582	2.67e-07	positive
C3H53	PebMYB51	0.967577	2.67e-07	positive
NAC3	PebMYB47	0.967561	2.68e-07	positive
WRKY32	PebMYB66	0.967548	2.68e-07	positive
AP2/ERF118	PebMYB64	0.967546	2.68e-07	positive
WRKY16	PebMYB177	0.967539	2.69e-07	positive
HSF18	PebMYB64	0.967532	2.69e-07	positive
AP2/ERF48	PebMYB51	0.967488	2.71e-07	positive
bZIP6	PebMYB90	0.967486	2.71e-07	positive
C2C2-YABBY7	PebMYB24	0.967474	2.71e-07	positive
AP2/ERF98	PebMYB1	0.967454	2.72e-07	positive
zf-HD10	PebMYB68	0.967449	2.72e-07	positive
GRF4	PebMYB59	0.967431	2.73e-07	positive
C2H250	PebMYB95	0.967416	2.74e-07	positive
HSF16	PebMYB47	0.967414	2.74e-07	positive
HSF14	PebMYB86	0.967403	2.74e-07	positive
WRKY66	PebMYB80	0.967392	2.75e-07	positive
AP2/ERF20	PebMYB20	0.96737	2.76e-07	positive
bHLH72	PebMYB44	0.967369	2.76e-07	positive
AP2/ERF57	PebMYB94	0.96733	2.77e-07	positive
HD-ZIP16	PebMYB54	0.967327	2.78e-07	positive
C3H76	PebMYB154	0.967318	2.78e-07	positive
GRAS14	PebMYB19	0.967307	2.78e-07	positive
AP2/ERF118	PebMYB97	0.967285	2.79e-07	positive
WRKY61	PebMYB88	0.967276	2.8e-07	positive
WRKY85	PebMYB19	0.967266	2.8e-07	positive
NAC3	PebMYB16	0.967256	2.81e-07	positive
WRKY65	PebMYB58	0.967198	2.83e-07	positive
C2H266	PebMYB38	0.967156	2.85e-07	positive
C2H28	PebMYB58	0.967148	2.85e-07	positive
bZIP76	PebMYB188	0.96712	2.86e-07	positive
C2C2-Dof18	PebMYB4	0.967077	2.88e-07	positive
C2H212	PebMYB154	0.967062	2.89e-07	positive
GRAS29	PebMYB94	0.967051	2.89e-07	positive
HB-BELL7	PebMYB96	-0.967048	2.9e-07	negative
NAC16	PebMYB47	0.967042	2.9e-07	positive
C2C2-Dof37	PebMYB179	0.967038	2.9e-07	positive
GRAS10	PebMYB58	0.967034	2.9e-07	positive
HB-other13	PebMYB144	0.967029	2.9e-07	positive
MADS-MIKC3	PebMYB177	0.967024	2.91e-07	positive
AP2/ERF86	PebMYB15	0.967	2.92e-07	positive
C2H225	PebMYB212	0.966992	2.92e-07	positive
C2C2-Dof14	PebMYB117	0.966985	2.92e-07	positive
B363	PebMYB94	0.966954	2.94e-07	positive
RWP-RK9	PebMYB106	0.966919	2.95e-07	positive
GARP40	PebMYB43	0.966906	2.96e-07	positive
NF-YB2	PebMYB6	0.966903	2.96e-07	positive
OFP5	PebMYB214	0.966885	2.97e-07	positive
PLATZ2	PebMYB147	-0.966883	2.97e-07	negative
AP2/ERF16	PebMYB94	0.966877	2.97e-07	positive
C2C2-Dof20	PebMYB155	-0.966874	2.97e-07	negative
HSF2	PebMYB101	0.966842	2.99e-07	positive
HD-ZIP35	PebMYB96	-0.966833	2.99e-07	negative
bZIP29	PebMYB23	0.966828	2.99e-07	positive
HD-ZIP9	PebMYB87	0.966827	2.99e-07	positive
bHLH105	PebMYB36	0.966821	3e-07	positive
NAC20	PebMYB58	0.966818	3e-07	positive
AP2/ERF122	PebMYB15	0.966812	3e-07	positive
HSF18	PebMYB4	0.966797	3.01e-07	positive
WRKY72	PebMYB58	0.966765	3.02e-07	positive
C2C2-CO4	PebMYB96	-0.966713	3.04e-07	negative
OFP7	PebMYB94	0.966687	3.06e-07	positive
bHLH10	PebMYB215	-0.96666	3.07e-07	negative
WRKY60	PebMYB58	0.966634	3.08e-07	positive
bZIP25	PebMYB165	0.966629	3.08e-07	positive
HB-BELL10	PebMYB212	0.966627	3.08e-07	positive
C2H222	PebMYB60	0.966616	3.09e-07	positive
GRAS36	PebMYB154	0.966609	3.09e-07	positive
C2H252	PebMYB96	-0.966587	3.1e-07	negative
AP2/ERF109	PebMYB18	0.966574	3.11e-07	positive
MADS-MIKC19	PebMYB7	0.966571	3.11e-07	positive
NAC4	PebMYB71	0.966559	3.11e-07	positive
C2C2-Dof39	PebMYB64	0.966517	3.13e-07	positive
NF-YA3	PebMYB80	0.966474	3.15e-07	positive
C2H282	PebMYB144	0.966465	3.16e-07	positive
WRKY90	PebMYB20	0.966451	3.16e-07	positive
GRAS21	PebMYB58	0.966431	3.17e-07	positive
HD-ZIP17	PebMYB42	0.966422	3.18e-07	positive
B38	PebMYB49	0.966421	3.18e-07	positive
bHLH50	PebMYB174	0.9664	3.19e-07	positive
B38	PebMYB16	0.96639	3.19e-07	positive
bHLH47	PebMYB177	0.966388	3.19e-07	positive
LOB4	PebMYB194	0.966381	3.2e-07	positive
WRKY20	PebMYB106	0.966369	3.2e-07	positive
GRAS5	PebMYB19	0.966364	3.2e-07	positive
HD-ZIP26	PebMYB57	0.966346	3.21e-07	positive
GRAS33	PebMYB47	0.966327	3.22e-07	positive
HB-BELL17	PebMYB54	0.966318	3.23e-07	positive
NAC42	PebMYB97	0.966311	3.23e-07	positive
GARP52	PebMYB64	0.966294	3.24e-07	positive
PLATZ2	PebMYB155	0.96629	3.24e-07	positive
B33	PebMYB190	0.966283	3.24e-07	positive
WRKY60	PebMYB113	0.966271	3.25e-07	positive
C2H280	PebMYB2	0.966253	3.26e-07	positive
TCP17	PebMYB121	0.966249	3.26e-07	positive
WRKY21	PebMYB158	0.966236	3.27e-07	positive
C2C2-YABBY5	PebMYB24	0.966224	3.27e-07	positive
GARP5	PebMYB86	0.966185	3.29e-07	positive
MADS-MIKC10	PebMYB16	0.966175	3.29e-07	positive
NAC17	PebMYB47	0.966157	3.3e-07	positive
GRAS40	PebMYB6	0.966122	3.32e-07	positive
C2H224	PebMYB80	0.96612	3.32e-07	positive
HD-ZIP3	PebMYB87	0.966118	3.32e-07	positive
GARP34	PebMYB140	0.9661	3.33e-07	positive
B337	PebMYB94	0.966098	3.33e-07	positive
HB-WOX6	PebMYB13	0.966096	3.33e-07	positive
B363	PebMYB90	0.966094	3.33e-07	positive
MADS-MIKC19	PebMYB212	0.96609	3.34e-07	positive
SBP23	PebMYB117	0.966085	3.34e-07	positive
SBP12	PebMYB42	0.966032	3.36e-07	positive
GRAS4	PebMYB113	0.966019	3.37e-07	positive
LOB15	PebMYB53	0.966013	3.37e-07	positive
HB-BELL1	PebMYB96	-0.965996	3.38e-07	negative
GRAS10	PebMYB51	0.965986	3.39e-07	positive
C2H252	PebMYB172	0.965985	3.39e-07	positive
C2H210	PebMYB113	0.965981	3.39e-07	positive
C2C2-Dof2	PebMYB86	0.965976	3.39e-07	positive
C2C2-Dof39	PebMYB91	0.965963	3.4e-07	positive
bZIP22	PebMYB121	0.965948	3.41e-07	positive
LOB22	PebMYB90	0.965934	3.41e-07	positive
bHLH92	PebMYB147	0.965933	3.41e-07	positive
GRAS30	PebMYB88	0.965918	3.42e-07	positive
C2C2-Dof37	PebMYB19	0.965904	3.43e-07	positive
HD-ZIP10	PebMYB174	0.965878	3.44e-07	positive
E2F-DP4	PebMYB179	0.965874	3.44e-07	positive
SRS4	PebMYB68	0.965868	3.44e-07	positive
AP2/ERF124	PebMYB101	0.965867	3.45e-07	positive
HB-BELL1	PebMYB78	0.965865	3.45e-07	positive
WRKY69	PebMYB53	0.965859	3.45e-07	positive
WRKY62	PebMYB117	0.965836	3.46e-07	positive
AP2/ERF73	PebMYB14	0.965819	3.47e-07	positive
bHLH53	PebMYB3R3	0.965815	3.47e-07	positive
SBP12	PebMYB87	0.965814	3.47e-07	positive
NAC7	PebMYB212	0.965799	3.48e-07	positive
AP2/ERF97	PebMYB147	-0.965771	3.49e-07	negative
AP2/ERF59	PebMYB87	0.965752	3.5e-07	positive
LOB9	PebMYB47	0.965749	3.5e-07	positive
HSF16	PebMYB15	0.965696	3.53e-07	positive
WRKY17	PebMYB4	0.965668	3.55e-07	positive
AP2/ERF129	PebMYB51	0.965661	3.55e-07	positive
B33	PebMYB191	0.965647	3.56e-07	positive
bZIP35	PebMYB83	0.965639	3.56e-07	positive
B337	PebMYB69	0.965634	3.56e-07	positive
HB-BELL14	PebMYB140	0.965618	3.57e-07	positive
GRF1	PebMYB38	0.965537	3.61e-07	positive
C2C2-Dof2	PebMYB69	0.965535	3.61e-07	positive
LOB4	PebMYB16	0.965518	3.62e-07	positive
WRKY67	PebMYB86	0.965499	3.63e-07	positive
WRKY85	PebMYB40	0.965495	3.64e-07	positive
bZIP2	PebMYB22	0.965483	3.64e-07	positive
HD-ZIP26	PebMYB78	0.965476	3.65e-07	positive
GRAS5	PebMYB4	0.965434	3.67e-07	positive
Tify10	PebMYB40	0.965407	3.68e-07	positive
PLATZ2	PebMYB173	0.965377	3.7e-07	positive
bHLH86	PebMYB125	0.965349	3.71e-07	positive
GARP5	PebMYB19	0.965349	3.71e-07	positive
RWP-RK4	PebMYB215	-0.965343	3.72e-07	negative
C2H233	PebMYB91	0.965337	3.72e-07	positive
AP2/ERF17	PebMYB47	0.965336	3.72e-07	positive
AP2/ERF59	PebMYB32	0.965313	3.73e-07	positive
AP2/ERF21	PebMYB49	0.965306	3.73e-07	positive
bHLH8	PebMYB113	0.965304	3.74e-07	positive
HB-other10	PebMYB30	0.965264	3.76e-07	positive
AP2/ERF87	PebMYB16	0.965256	3.76e-07	positive
B38	PebMYB51	0.965243	3.77e-07	positive
HB-other10	PebMYB215	-0.965238	3.77e-07	negative
HD-ZIP27	PebMYB154	0.965217	3.78e-07	positive
GRAS51	PebMYB83	0.965208	3.79e-07	positive
TCP4	PebMYB154	0.965188	3.8e-07	positive
Tify18	PebMYB81	0.965178	3.8e-07	positive
B361	PebMYB171	0.965144	3.82e-07	positive
C2C2-Dof13	PebMYB43	0.965143	3.82e-07	positive
NAC46	PebMYB173	-0.965133	3.83e-07	negative
HD-ZIP59	PebMYB42	0.965118	3.84e-07	positive
BES110	PebMYB216	-0.965105	3.84e-07	negative
NAC1	PebMYB94	0.96508	3.86e-07	positive
DDT5	PebMYB24	-0.965078	3.86e-07	negative
GeBP4	PebMYB190	0.965078	3.86e-07	positive
WRKY13	PebMYB80	0.965061	3.87e-07	positive
NF-YA9	PebMYB101	0.96506	3.87e-07	positive
TCP21	PebMYB173	0.96504	3.88e-07	positive
AP2/ERF118	PebMYB43	0.965039	3.88e-07	positive
C2C2-Dof44	PebMYB80	0.965033	3.88e-07	positive
AP2/ERF38	PebMYB155	-0.965023	3.89e-07	negative
NAC29	PebMYB177	0.965013	3.89e-07	positive
BES112	PebMYB83	0.965002	3.9e-07	positive
WRKY60	PebMYB13	0.965001	3.9e-07	positive
NAC7	PebMYB14	0.965001	3.9e-07	positive
WRKY14	PebMYB64	0.964999	3.9e-07	positive
C2H29	PebMYB20	0.964989	3.91e-07	positive
MADS-MIKC7	PebMYB4	0.964955	3.92e-07	positive
GRAS50	PebMYB177	0.964943	3.93e-07	positive
C2C2-CO8	PebMYB38	0.964915	3.95e-07	positive
C2H273	PebMYB49	0.964915	3.95e-07	positive
NAC71	PebMYB195	0.964911	3.95e-07	positive
NAC1	PebMYB144	0.964879	3.97e-07	positive
C2C2-Dof43	PebMYB68	0.964863	3.98e-07	positive
bHLH76	PebMYB147	0.964829	4e-07	positive
AP2/ERF27	PebMYB1	0.964813	4e-07	positive
AP2/ERF118	PebMYB4	0.964811	4.01e-07	positive
zf-HD16	PebMYB39	0.964807	4.01e-07	positive
AP2/ERF80	PebMYB49	0.964743	4.04e-07	positive
bZIP13	PebMYB69	0.964728	4.05e-07	positive
AP2/ERF20	PebMYB1	0.964704	4.07e-07	positive
SBP2	PebMYB57	-0.964688	4.07e-07	negative
HB-other12	PebMYB94	0.964682	4.08e-07	positive
B364	PebMYB94	0.964678	4.08e-07	positive
HB-other7	PebMYB158	0.964666	4.09e-07	positive
bHLH43	PebMYB174	0.964655	4.09e-07	positive
bHLH25	PebMYB214	0.964634	4.11e-07	positive
C2H230	PebMYB172	0.964634	4.11e-07	positive
HD-ZIP16	PebMYB157	0.964629	4.11e-07	positive
C2H267	PebMYB24	0.964587	4.13e-07	positive
NAC3	PebMYB88	0.964582	4.14e-07	positive
C2H230	PebMYB173	0.964569	4.14e-07	positive
Tify10	PebMYB83	0.964554	4.15e-07	positive
HD-ZIP59	PebMYB174	0.96452	4.17e-07	positive
NAC3	PebMYB58	0.964503	4.18e-07	positive
MADS-M-type6	PebMYB13	0.964489	4.19e-07	positive
B337	PebMYB60	0.964464	4.2e-07	positive
WRKY66	PebMYB90	0.964441	4.22e-07	positive
AP2/ERF135	PebMYB38	0.964416	4.23e-07	positive
HD-ZIP52	PebMYB38	0.964416	4.23e-07	positive
TCP5	PebMYB42	0.964405	4.24e-07	positive
HSF4	PebMYB88	0.964401	4.24e-07	positive
GRAS33	PebMYB19	0.96434	4.28e-07	positive
HB-BELL10	PebMYB165	-0.96432	4.29e-07	negative
AP2/ERF19	PebMYB1	0.964307	4.3e-07	positive
LOB12	PebMYB174	0.964281	4.31e-07	positive
C2H274	PebMYB34	0.964262	4.32e-07	positive
OFP5	PebMYB165	-0.964262	4.32e-07	negative
bZIP36	PebMYB164	0.964227	4.34e-07	positive
HB-other12	PebMYB13	0.964187	4.37e-07	positive
B311	PebMYB70	0.964168	4.38e-07	positive
C2H286	PebMYB94	0.964159	4.39e-07	positive
AP2/ERF17	PebMYB88	0.964145	4.39e-07	positive
C2H28	PebMYB16	0.964143	4.4e-07	positive
NAC14	PebMYB94	0.964128	4.4e-07	positive
AP2/ERF15	PebMYB113	0.964123	4.41e-07	positive
OFP5	PebMYB57	0.96412	4.41e-07	positive
AP2/ERF98	PebMYB101	0.96402	4.47e-07	positive
BBR-BPC3	PebMYB166	0.964019	4.47e-07	positive
GRAS14	PebMYB177	0.964013	4.47e-07	positive
bHLH50	PebMYB54	0.964009	4.48e-07	positive
RWP-RK4	PebMYB30	0.964003	4.48e-07	positive
C2C2-Dof2	PebMYB90	0.963999	4.48e-07	positive
HD-ZIP32	PebMYB179	0.963988	4.49e-07	positive
C2H274	PebMYB194	0.963984	4.49e-07	positive
bHLH9	PebMYB155	-0.963968	4.5e-07	negative
GARP10	PebMYB69	0.96394	4.52e-07	positive
TUB13	PebMYB57	0.963933	4.52e-07	positive
GARP40	PebMYB34	0.96393	4.53e-07	positive
EIL7	PebMYB71	0.963925	4.53e-07	positive
TCP5	PebMYB172	0.963876	4.56e-07	positive
B362	PebMYB158	0.963873	4.56e-07	positive
bZIP82	PebMYB58	0.963846	4.58e-07	positive
SRS7	PebMYB3R3	0.963835	4.58e-07	positive
NAC7	PebMYB172	0.96382	4.59e-07	positive
GARP67	PebMYB113	0.963819	4.6e-07	positive
CAMTA1	PebMYB216	0.963813	4.6e-07	positive
C2C2-Dof18	PebMYB144	0.963805	4.6e-07	positive
C2C2-YABBY3	PebMYB24	0.963803	4.61e-07	positive
C3H72	PebMYB51	0.963802	4.61e-07	positive
AP2/ERF1	PebMYB77	0.963793	4.61e-07	positive
NAC15	PebMYB194	0.963779	4.62e-07	positive
bHLH42	PebMYB3R3	0.963777	4.62e-07	positive
WRKY67	PebMYB4	0.963767	4.63e-07	positive
C2C2-YABBY5	PebMYB121	0.963736	4.65e-07	positive
MADS-MIKC3	PebMYB47	0.963723	4.66e-07	positive
NAC47	PebMYB43	0.963721	4.66e-07	positive
C2H255	PebMYB68	0.963721	4.66e-07	positive
BBR-BPC4	PebMYB216	0.963675	4.69e-07	positive
GARP1	PebMYB77	0.96365	4.7e-07	positive
C2C2-Dof10	PebMYB121	0.963642	4.71e-07	positive
HSF17	PebMYB49	0.963623	4.72e-07	positive
SBP24	PebMYB19	0.963607	4.73e-07	positive
HSF2	PebMYB22	0.963601	4.73e-07	positive
AP2/ERF5	PebMYB22	0.963589	4.74e-07	positive
bZIP29	PebMYB70	0.963589	4.74e-07	positive
GRAS4	PebMYB58	0.963573	4.75e-07	positive
C2H216	PebMYB214	0.963565	4.76e-07	positive
bHLH39	PebMYB66	0.963547	4.77e-07	positive
MADS-MIKC4	PebMYB47	0.963535	4.78e-07	positive
bZIP42	PebMYB4	0.963526	4.78e-07	positive
GRAS4	PebMYB16	0.963519	4.79e-07	positive
bHLH33	PebMYB54	0.963508	4.79e-07	positive
HB-other12	PebMYB30	0.963489	4.81e-07	positive
HB-BELL1	PebMYB172	0.963479	4.81e-07	positive
GARP42	PebMYB214	0.963478	4.81e-07	positive
SBP23	PebMYB4	0.963457	4.83e-07	positive
HSF32	PebMYB158	0.963453	4.83e-07	positive
C2C2-Dof14	PebMYB113	0.963446	4.83e-07	positive
NAC3	PebMYB19	0.963427	4.85e-07	positive
AP2/ERF104	PebMYB94	0.963424	4.85e-07	positive
AP2/ERF19	PebMYB20	0.963424	4.85e-07	positive
NAC17	PebMYB90	0.963419	4.85e-07	positive
HSF5	PebMYB15	0.963385	4.87e-07	positive
C2C2-Dof9	PebMYB174	0.963365	4.89e-07	positive
TCP10	PebMYB57	-0.963358	4.89e-07	negative
bZIP70	PebMYB77	0.963354	4.89e-07	positive
AP2/ERF92	PebMYB67	0.963349	4.9e-07	positive
NAC13	PebMYB101	0.963326	4.91e-07	positive
HD-ZIP9	PebMYB14	0.963324	4.91e-07	positive
NAC13	PebMYB98	0.963291	4.94e-07	positive
NF-YB2	PebMYB1	0.963288	4.94e-07	positive
AP2/ERF79	PebMYB177	0.963271	4.95e-07	positive
HSF25	PebMYB144	0.963243	4.97e-07	positive
WRKY29	PebMYB80	0.963214	4.99e-07	positive
HSF9	PebMYB47	0.963203	4.99e-07	positive
TCP35	PebMYB215	-0.963198	5e-07	negative
C2H224	PebMYB144	0.963172	5.02e-07	positive
HD-ZIP17	PebMYB87	0.963172	5.02e-07	positive
HD-ZIP40	PebMYB179	0.963171	5.02e-07	positive
AP2/ERF43	PebMYB158	0.96316	5.02e-07	positive
bHLH47	PebMYB19	0.963149	5.03e-07	positive
C2H238	PebMYB15	0.963141	5.04e-07	positive
bZIP81	PebMYB4	0.963138	5.04e-07	positive
AP2/ERF48	PebMYB20	0.963125	5.05e-07	positive
SBP10	PebMYB47	0.963117	5.05e-07	positive
AP2/ERF59	PebMYB42	0.963116	5.05e-07	positive
WRKY61	PebMYB15	0.963113	5.06e-07	positive
bHLH26	PebMYB211	0.963107	5.06e-07	positive
C2H233	PebMYB60	0.963104	5.06e-07	positive
C2H24	PebMYB97	0.963076	5.08e-07	positive
GARP17	PebMYB144	0.963066	5.09e-07	positive
PLATZ2	PebMYB179	-0.963065	5.09e-07	negative
HB-BELL6	PebMYB173	-0.963065	5.09e-07	negative
HD-ZIP12	PebMYB68	0.963042	5.1e-07	positive
AP2/ERF38	PebMYB212	-0.963036	5.11e-07	negative
WRKY11	PebMYB40	0.963034	5.11e-07	positive
NAC32	PebMYB30	0.963011	5.12e-07	positive
HSF30	PebMYB154	0.963006	5.13e-07	positive
C2C2-YABBY3	PebMYB87	0.962984	5.14e-07	positive
NF-YA8	PebMYB166	0.962958	5.16e-07	positive
Tify10	PebMYB194	0.96295	5.17e-07	positive
bZIP81	PebMYB90	0.962941	5.17e-07	positive
bZIP42	PebMYB215	-0.96294	5.17e-07	negative
bZIP32	PebMYB60	0.962938	5.17e-07	positive
AP2/ERF108	PebMYB49	0.962937	5.18e-07	positive
bZIP17	PebMYB47	0.962936	5.18e-07	positive
GRF1	PebMYB68	0.962919	5.19e-07	positive
bZIP74	PebMYB69	0.962914	5.19e-07	positive
B337	PebMYB64	0.962902	5.2e-07	positive
CAMTA1	PebMYB2	-0.96289	5.21e-07	negative
WRKY92	PebMYB1	0.962888	5.21e-07	positive
NAC71	PebMYB204	0.962885	5.21e-07	positive
bHLH76	PebMYB165	0.962879	5.22e-07	positive
AP2/ERF25	PebMYB174	0.962872	5.22e-07	positive
NF-YA3	PebMYB30	0.962858	5.23e-07	positive
GARP52	PebMYB60	0.962857	5.23e-07	positive
C2H221	PebMYB212	0.962853	5.23e-07	positive
HSF14	PebMYB69	0.962851	5.24e-07	positive
GRAS4	PebMYB13	0.962847	5.24e-07	positive
WRKY20	PebMYB144	0.962845	5.24e-07	positive
AP2/ERF122	PebMYB51	0.962828	5.25e-07	positive
bHLH23	PebMYB106	0.962827	5.25e-07	positive
HSF20	PebMYB19	0.96282	5.26e-07	positive
MADS-MIKC17	PebMYB54	0.962774	5.29e-07	positive
AP2/ERF34	PebMYB194	0.962765	5.29e-07	positive
B365	PebMYB54	0.962762	5.3e-07	positive
RWP-RK4	PebMYB4	0.962753	5.3e-07	positive
SBP25	PebMYB42	0.96274	5.31e-07	positive
C2H280	PebMYB165	-0.962725	5.32e-07	negative
AP2/ERF28	PebMYB20	0.962723	5.32e-07	positive
WRKY73	PebMYB95	0.962697	5.34e-07	positive
HD-ZIP58	PebMYB154	0.962644	5.38e-07	positive
C2C2-YABBY1	PebMYB38	0.962644	5.38e-07	positive
Trihelix29	PebMYB43	0.962637	5.39e-07	positive
GARP35	PebMYB164	0.962637	5.39e-07	positive
LOB22	PebMYB19	0.962636	5.39e-07	positive
Alfin8	PebMYB159	-0.962635	5.39e-07	negative
HD-ZIP44	PebMYB157	0.962622	5.4e-07	positive
C2H231	PebMYB86	0.96262	5.4e-07	positive
C2H267	PebMYB78	0.962612	5.4e-07	positive
C2C2-Dof45	PebMYB3R3	0.962603	5.41e-07	positive
C2C2-Dof41	PebMYB13	0.962594	5.42e-07	positive
HB-BELL20	PebMYB111	-0.96256	5.44e-07	negative
bHLH39	PebMYB86	0.962555	5.44e-07	positive
MADS-MIKC22	PebMYB215	-0.962553	5.45e-07	negative
bZIP17	PebMYB43	0.962551	5.45e-07	positive
HD-ZIP8	PebMYB173	-0.96254	5.45e-07	negative
bZIP70	PebMYB117	0.96254	5.45e-07	positive
HB-WOX6	PebMYB90	0.962509	5.48e-07	positive
AP2/ERF17	PebMYB6	0.962505	5.48e-07	positive
NAC16	PebMYB15	0.9625	5.48e-07	positive
bZIP35	PebMYB86	0.962487	5.49e-07	positive
bZIP22	PebMYB54	0.962487	5.49e-07	positive
AP2/ERF45	PebMYB87	0.962471	5.5e-07	positive
C2H24	PebMYB69	0.96247	5.5e-07	positive
bZIP32	PebMYB64	0.962468	5.51e-07	positive
GRAS29	PebMYB90	0.962463	5.51e-07	positive
HD-ZIP26	PebMYB24	0.962457	5.51e-07	positive
bZIP23	PebMYB216	0.962453	5.52e-07	positive
AP2/ERF23	PebMYB6	0.962453	5.52e-07	positive
AP2/ERF27	PebMYB20	0.96244	5.53e-07	positive
bHLH61	PebMYB121	0.962413	5.55e-07	positive
DDT8	PebMYB77	0.962411	5.55e-07	positive
HD-ZIP39	PebMYB143	0.962399	5.56e-07	positive
Trihelix29	PebMYB64	0.962384	5.57e-07	positive
B363	PebMYB144	0.962365	5.58e-07	positive
bHLH33	PebMYB68	0.962359	5.59e-07	positive
bHLH101	PebMYB90	0.96234	5.6e-07	positive
AP2/ERF33	PebMYB20	0.962305	5.63e-07	positive
C2H228	PebMYB1	0.962302	5.63e-07	positive
GARP67	PebMYB13	0.962293	5.64e-07	positive
OFP5	PebMYB173	0.962277	5.65e-07	positive
TCP34	PebMYB172	0.962273	5.65e-07	positive
AP2/ERF21	PebMYB20	0.962255	5.66e-07	positive
NAC1	PebMYB117	0.962254	5.66e-07	positive
C2H240	PebMYB144	0.962243	5.67e-07	positive
C2H249	PebMYB20	0.962231	5.68e-07	positive
bZIP44	PebMYB90	0.962229	5.68e-07	positive
HSF9	PebMYB43	0.962216	5.69e-07	positive
GARP21	PebMYB97	0.962211	5.7e-07	positive
C2H25	PebMYB68	0.962195	5.71e-07	positive
MADS-MIKC4	PebMYB19	0.96219	5.71e-07	positive
NAC18	PebMYB23	0.962171	5.72e-07	positive
NAC7	PebMYB57	0.962147	5.74e-07	positive
C2C2-CO17	PebMYB212	0.962139	5.75e-07	positive
C2C2-Dof9	PebMYB14	0.962104	5.78e-07	positive
AP2/ERF79	PebMYB16	0.962097	5.78e-07	positive
bZIP43	PebMYB19	0.962089	5.79e-07	positive
C2C2-Dof25	PebMYB140	0.962077	5.8e-07	positive
WRKY11	PebMYB19	0.962051	5.82e-07	positive
C2C2-Dof41	PebMYB19	0.962042	5.82e-07	positive
MADS-MIKC12	PebMYB144	0.962026	5.83e-07	positive
GARP1	PebMYB19	0.962017	5.84e-07	positive
bHLH88	PebMYB214	0.962005	5.85e-07	positive
HD-ZIP26	PebMYB121	0.961994	5.86e-07	positive
MADS-MIKC22	PebMYB177	0.961993	5.86e-07	positive
HSF9	PebMYB6	0.961989	5.86e-07	positive
AP2/ERF28	PebMYB1	0.961948	5.89e-07	positive
WRKY11	PebMYB47	0.961946	5.9e-07	positive
MADS-MIKC10	PebMYB30	0.961944	5.9e-07	positive
C2H221	PebMYB165	-0.961938	5.9e-07	negative
zf-HD9	PebMYB38	0.961919	5.92e-07	positive
GARP10	PebMYB4	0.961912	5.92e-07	positive
HD-ZIP12	PebMYB121	0.961912	5.92e-07	positive
Trihelix30	PebMYB3R3	0.961911	5.92e-07	positive
WRKY61	PebMYB30	0.961881	5.95e-07	positive
HSF20	PebMYB47	0.961878	5.95e-07	positive
GARP69	PebMYB124	0.961876	5.95e-07	positive
GRF9	PebMYB38	0.961873	5.95e-07	positive
OFP14	PebMYB214	0.961852	5.97e-07	positive
WRKY66	PebMYB215	-0.961847	5.97e-07	negative
GRAS9	PebMYB4	0.961845	5.97e-07	positive
NAC8	PebMYB174	0.961826	5.99e-07	positive
HD-ZIP8	PebMYB71	0.961784	6.02e-07	positive
GRAS24	PebMYB16	0.961765	6.04e-07	positive
GRF16	PebMYB174	0.961764	6.04e-07	positive
AP2/ERF15	PebMYB4	0.96176	6.04e-07	positive
C2H211	PebMYB69	0.961734	6.06e-07	positive
bHLH44	PebMYB215	-0.961728	6.06e-07	negative
bZIP17	PebMYB34	0.961727	6.07e-07	positive
NAC6	PebMYB69	0.961726	6.07e-07	positive
HD-ZIP50	PebMYB121	0.961723	6.07e-07	positive
HD-ZIP35	PebMYB78	0.961714	6.07e-07	positive
HD-ZIP35	PebMYB82	0.961713	6.08e-07	positive
OFP16	PebMYB173	-0.961696	6.09e-07	negative
AP2/ERF72	PebMYB64	0.961695	6.09e-07	positive
NF-YA3	PebMYB4	0.96168	6.1e-07	positive
C2C2-YABBY5	PebMYB32	0.961619	6.15e-07	positive
GARP1	PebMYB16	0.961617	6.15e-07	positive
C2H267	PebMYB32	0.961615	6.15e-07	positive
bHLH7	PebMYB165	0.96156	6.2e-07	positive
bHLH17	PebMYB49	0.961537	6.21e-07	positive
NAC15	PebMYB71	0.961532	6.22e-07	positive
HB-BELL7	PebMYB42	0.961527	6.22e-07	positive
OFP6	PebMYB83	0.961506	6.24e-07	positive
bZIP32	PebMYB58	0.9615	6.24e-07	positive
C2H233	PebMYB34	0.961477	6.26e-07	positive
HB-BELL1	PebMYB173	0.96145	6.28e-07	positive
HD-ZIP35	PebMYB14	0.961439	6.29e-07	positive
MADS-MIKC1	PebMYB210	0.961422	6.31e-07	positive
BES19	PebMYB47	0.961416	6.31e-07	positive
bZIP67	PebMYB22	0.961406	6.32e-07	positive
Trihelix29	PebMYB69	0.961404	6.32e-07	positive
bHLH13	PebMYB214	0.961401	6.32e-07	positive
AP2/ERF15	PebMYB80	0.961385	6.34e-07	positive
C2H29	PebMYB22	0.961379	6.34e-07	positive
BES113	PebMYB174	0.96137	6.35e-07	positive
B353	PebMYB97	0.961339	6.37e-07	positive
WRKY62	PebMYB90	0.961321	6.39e-07	positive
bZIP42	PebMYB113	0.961319	6.39e-07	positive
Tify1	PebMYB194	0.961296	6.41e-07	positive
AP2/ERF87	PebMYB58	0.961287	6.42e-07	positive
GARP67	PebMYB90	0.961257	6.44e-07	positive
NAC64	PebMYB113	0.961252	6.45e-07	positive
WRKY87	PebMYB11	0.961217	6.47e-07	positive
MADS-MIKC10	PebMYB177	0.961211	6.48e-07	positive
OFP5	PebMYB155	0.961208	6.48e-07	positive
C2C2-Dof5	PebMYB57	0.961204	6.48e-07	positive
WRKY62	PebMYB94	0.961145	6.53e-07	positive
HB-WOX6	PebMYB86	0.961124	6.55e-07	positive
C2H262	PebMYB197	0.961122	6.55e-07	positive
C2H286	PebMYB80	0.96112	6.55e-07	positive
C2H222	PebMYB64	0.961113	6.56e-07	positive
C2C2-Dof41	PebMYB16	0.961113	6.56e-07	positive
LOB10	PebMYB158	0.961113	6.56e-07	positive
HSF16	PebMYB58	0.961105	6.57e-07	positive
GARP1	PebMYB60	0.961086	6.58e-07	positive
HSF17	PebMYB51	0.96104	6.62e-07	positive
AP2/ERF97	PebMYB179	-0.96104	6.62e-07	negative
bZIP6	PebMYB113	0.961023	6.64e-07	positive
NF-YA3	PebMYB144	0.961017	6.64e-07	positive
WRKY45	PebMYB6	0.96101	6.65e-07	positive
TCP12	PebMYB174	0.960984	6.67e-07	positive
MADS-MIKC19	PebMYB173	0.960969	6.68e-07	positive
C2H296	PebMYB101	0.960934	6.71e-07	positive
C3H6	PebMYB216	0.960934	6.71e-07	positive
LOB24	PebMYB20	0.96089	6.75e-07	positive
C2H273	PebMYB20	0.960881	6.76e-07	positive
MADS-MIKC22	PebMYB19	0.960856	6.78e-07	positive
GARP52	PebMYB91	0.960846	6.79e-07	positive
C2H226	PebMYB47	0.960845	6.79e-07	positive
C2H228	PebMYB58	0.960826	6.8e-07	positive
B365	PebMYB174	0.960813	6.81e-07	positive
BES113	PebMYB38	0.960811	6.82e-07	positive
B38	PebMYB58	0.960809	6.82e-07	positive
AP2/ERF57	PebMYB106	0.960787	6.84e-07	positive
WRKY92	PebMYB6	0.960768	6.85e-07	positive
AP2/ERF72	PebMYB34	0.96076	6.86e-07	positive
LOB4	PebMYB19	0.960732	6.88e-07	positive
WRKY92	PebMYB15	0.960721	6.89e-07	positive
C2C2-GATA21	PebMYB82	0.960718	6.9e-07	positive
LOB10	PebMYB146	0.960718	6.9e-07	positive
C2H224	PebMYB94	0.960718	6.9e-07	positive
bHLH7	PebMYB147	0.960711	6.9e-07	positive
GRAS48	PebMYB16	0.960707	6.9e-07	positive
C2H242	PebMYB40	0.960662	6.94e-07	positive
bHLH63	PebMYB155	0.960659	6.95e-07	positive
bHLH50	PebMYB24	0.960656	6.95e-07	positive
HSF25	PebMYB4	0.960655	6.95e-07	positive
E2F-DP4	PebMYB155	-0.960645	6.96e-07	negative
WRKY60	PebMYB177	0.960644	6.96e-07	positive
EIL7	PebMYB155	-0.960613	6.99e-07	negative
SBP23	PebMYB69	0.960502	7.08e-07	positive
MADS-MIKC4	PebMYB15	0.960473	7.11e-07	positive
Tify17	PebMYB30	0.960437	7.14e-07	positive
WRKY24	PebMYB24	0.960435	7.14e-07	positive
AP2/ERF66	PebMYB58	0.960428	7.15e-07	positive
WRKY17	PebMYB60	0.960421	7.16e-07	positive
Tify9	PebMYB1	0.960415	7.16e-07	positive
GRAS11	PebMYB47	0.960383	7.19e-07	positive
C2C2-Dof14	PebMYB86	0.960381	7.19e-07	positive
B39	PebMYB2	-0.960365	7.21e-07	negative
RWP-RK9	PebMYB13	0.96036	7.21e-07	positive
AP2/ERF23	PebMYB9	0.960349	7.22e-07	positive
HSF18	PebMYB16	0.960333	7.24e-07	positive
bHLH12	PebMYB13	0.960332	7.24e-07	positive
C2C2-CO8	PebMYB68	0.960326	7.24e-07	positive
AP2/ERF119	PebMYB34	0.960324	7.24e-07	positive
HSF11	PebMYB64	0.960298	7.27e-07	positive
HSF14	PebMYB13	0.960291	7.27e-07	positive
TCP28	PebMYB78	0.960279	7.28e-07	positive
bZIP74	PebMYB194	0.960275	7.29e-07	positive
TCP40	PebMYB157	0.96026	7.3e-07	positive
HD-ZIP26	PebMYB155	0.96025	7.31e-07	positive
C2H216	PebMYB212	0.960237	7.32e-07	positive
HSF14	PebMYB19	0.960229	7.33e-07	positive
HD-ZIP44	PebMYB54	0.960207	7.35e-07	positive
MADS-MIKC7	PebMYB69	0.960201	7.36e-07	positive
C2H238	PebMYB30	0.960183	7.37e-07	positive
C2C2-Dof39	PebMYB60	0.960168	7.39e-07	positive
HSF21	PebMYB58	0.96013	7.42e-07	positive
HD-ZIP59	PebMYB157	0.960109	7.44e-07	positive
AP2/ERF16	PebMYB117	0.960094	7.45e-07	positive
Tify9	PebMYB15	0.960087	7.46e-07	positive
C2C2-CO17	PebMYB78	0.96004	7.5e-07	positive
C2H265	PebMYB86	0.960029	7.51e-07	positive
WRKY51	PebMYB147	0.960024	7.52e-07	positive
bZIP35	PebMYB4	0.959996	7.54e-07	positive
C2C2-Dof13	PebMYB34	0.959994	7.55e-07	positive
bZIP67	PebMYB101	0.959987	7.55e-07	positive
TCP6	PebMYB40	0.959983	7.56e-07	positive
bHLH10	PebMYB80	0.959974	7.56e-07	positive
HD-ZIP8	PebMYB155	-0.959953	7.58e-07	negative
Tify11	PebMYB158	0.959939	7.6e-07	positive
WRKY89	PebMYB164	0.959888	7.64e-07	positive
SRS3	PebMYB208	0.959862	7.67e-07	positive
GRAS48	PebMYB66	0.959804	7.72e-07	positive
C2C2-YABBY7	PebMYB143	0.959792	7.74e-07	positive
B364	PebMYB144	0.959771	7.76e-07	positive
HD-ZIP39	PebMYB78	0.959754	7.77e-07	positive
GARP9	PebMYB43	0.959746	7.78e-07	positive
AP2/ERF40	PebMYB30	0.95974	7.78e-07	positive
NAC68	PebMYB172	0.959689	7.83e-07	positive
AP2/ERF122	PebMYB19	0.95967	7.85e-07	positive
HD-ZIP35	PebMYB24	0.959665	7.86e-07	positive
GARP9	PebMYB15	0.959633	7.89e-07	positive
AP2/ERF91	PebMYB173	-0.959618	7.9e-07	negative
GRAS4	PebMYB215	-0.9596	7.92e-07	negative
NAC21	PebMYB20	0.959581	7.94e-07	positive
bZIP42	PebMYB80	0.959576	7.94e-07	positive
BES113	PebMYB68	0.959573	7.95e-07	positive
HB-other12	PebMYB80	0.959565	7.95e-07	positive
C2H265	PebMYB90	0.95956	7.96e-07	positive
WRKY7	PebMYB83	0.959537	7.98e-07	positive
Trihelix29	PebMYB60	0.95953	7.99e-07	positive
C2H238	PebMYB43	0.9595	8.02e-07	positive
HD-ZIP44	PebMYB14	0.959497	8.02e-07	positive
GRAS51	PebMYB69	0.959491	8.03e-07	positive
MADS-MIKC3	PebMYB58	0.959488	8.03e-07	positive
zf-HD9	PebMYB174	0.959481	8.04e-07	positive
TCP28	PebMYB214	0.959475	8.04e-07	positive
AP2/ERF33	PebMYB1	0.95947	8.05e-07	positive
AP2/ERF124	PebMYB22	0.959456	8.06e-07	positive
TUB13	PebMYB131	0.959445	8.07e-07	positive
bHLH8	PebMYB30	0.959438	8.08e-07	positive
NF-YC2	PebMYB40	-0.959433	8.08e-07	negative
AP2/ERF20	PebMYB101	0.959419	8.1e-07	positive
WRKY62	PebMYB144	0.959414	8.1e-07	positive
HB-BELL6	PebMYB212	-0.959406	8.11e-07	negative
bZIP47	PebMYB154	0.959405	8.11e-07	positive
HD-ZIP3	PebMYB14	0.959402	8.11e-07	positive
C2H265	PebMYB16	0.959395	8.12e-07	positive
GRAS10	PebMYB16	0.959368	8.15e-07	positive
SBP23	PebMYB144	0.959361	8.15e-07	positive
TCP35	PebMYB58	0.959353	8.16e-07	positive
GRAS48	PebMYB30	0.959342	8.17e-07	positive
AP2/ERF15	PebMYB215	-0.959298	8.22e-07	negative
HSF14	PebMYB64	0.959286	8.23e-07	positive
HSF13	PebMYB155	-0.959278	8.24e-07	negative
HD-ZIP26	PebMYB96	-0.959275	8.24e-07	negative
C3H73	PebMYB124	0.959275	8.24e-07	positive
OFP6	PebMYB97	0.959271	8.24e-07	positive
C2H28	PebMYB94	0.959205	8.31e-07	positive
bHLH44	PebMYB177	0.959204	8.31e-07	positive
Trihelix29	PebMYB88	0.9592	8.31e-07	positive
WRKY14	PebMYB13	0.959199	8.31e-07	positive
STAT1	PebMYB13	0.95917	8.34e-07	positive
GRAS10	PebMYB88	0.959161	8.35e-07	positive
HD-ZIP17	PebMYB68	0.959161	8.35e-07	positive
GARP52	PebMYB88	0.959129	8.39e-07	positive
HB-WOX6	PebMYB144	0.959122	8.39e-07	positive
WRKY14	PebMYB66	0.959109	8.41e-07	positive
HD-ZIP42	PebMYB140	0.959095	8.42e-07	positive
C2H264	PebMYB86	0.959091	8.42e-07	positive
GARP1	PebMYB64	0.959089	8.43e-07	positive
HB-BELL7	PebMYB121	0.959083	8.43e-07	positive
B335	PebMYB47	0.959082	8.43e-07	positive
HSF25	PebMYB46	0.959038	8.48e-07	positive
WRKY46	PebMYB158	0.959033	8.48e-07	positive
NAC42	PebMYB215	-0.959027	8.49e-07	negative
C2H224	PebMYB113	0.959004	8.51e-07	positive
C2H280	PebMYB216	-0.958992	8.52e-07	negative
MADS-MIKC22	PebMYB94	0.958972	8.54e-07	positive
bZIP73	PebMYB113	0.958931	8.59e-07	positive
NAC17	PebMYB177	0.958927	8.59e-07	positive
B39	PebMYB155	-0.958923	8.6e-07	negative
bHLH61	PebMYB172	0.958902	8.62e-07	positive
BES112	PebMYB66	0.958886	8.63e-07	positive
bHLH71	PebMYB71	0.958882	8.64e-07	positive
HB-other14	PebMYB19	0.958846	8.68e-07	positive
SBP2	PebMYB190	0.95884	8.68e-07	positive
C2H24	PebMYB64	0.958835	8.69e-07	positive
C2C2-CO2	PebMYB159	0.95883	8.69e-07	positive
bZIP63	PebMYB147	0.958819	8.7e-07	positive
AP2/ERF115	PebMYB1	0.958813	8.71e-07	positive
HSF5	PebMYB43	0.958811	8.71e-07	positive
C2C2-YABBY7	PebMYB172	0.958808	8.71e-07	positive
bZIP42	PebMYB144	0.958789	8.73e-07	positive
WRKY14	PebMYB144	0.958788	8.74e-07	positive
WRKY50	PebMYB3R5	0.95877	8.75e-07	positive
WRKY14	PebMYB69	0.958769	8.76e-07	positive
NAC29	PebMYB30	0.958763	8.76e-07	positive
GARP1	PebMYB69	0.95875	8.78e-07	positive
GARP52	PebMYB15	0.95873	8.8e-07	positive
NAC46	PebMYB71	0.958715	8.81e-07	positive
NAC32	PebMYB16	0.958708	8.82e-07	positive
HD-ZIP10	PebMYB87	0.95869	8.84e-07	positive
bZIP35	PebMYB3R5	0.958687	8.84e-07	positive
AP2/ERF63	PebMYB47	0.958684	8.84e-07	positive
AP2/ERF72	PebMYB91	0.958676	8.85e-07	positive
NAC38	PebMYB64	0.958676	8.85e-07	positive
LOB15	PebMYB80	0.95867	8.86e-07	positive
B38	PebMYB6	0.958655	8.88e-07	positive
bZIP67	PebMYB47	0.958644	8.89e-07	positive
GARP5	PebMYB83	0.95863	8.9e-07	positive
HB-other13	PebMYB113	0.958599	8.94e-07	positive
WRKY85	PebMYB69	0.958581	8.95e-07	positive
bZIP38	PebMYB83	0.958573	8.96e-07	positive
OFP13	PebMYB87	0.958566	8.97e-07	positive
bHLH44	PebMYB13	0.958501	9.04e-07	positive
TCP19	PebMYB215	-0.958498	9.04e-07	negative
bHLH101	PebMYB117	0.958494	9.05e-07	positive
C2C2-GATA5	PebMYB77	0.958463	9.08e-07	positive
bHLH8	PebMYB16	0.958434	9.11e-07	positive
BES112	PebMYB124	0.958392	9.16e-07	positive
B335	PebMYB43	0.958391	9.16e-07	positive
bZIP32	PebMYB91	0.958378	9.17e-07	positive
B38	PebMYB15	0.958369	9.18e-07	positive
E2F-DP4	PebMYB71	0.958364	9.19e-07	positive
GRAS35	PebMYB47	0.958358	9.19e-07	positive
AP2/ERF100	PebMYB181	0.958348	9.21e-07	positive
C2C2-Dof41	PebMYB117	0.95834	9.21e-07	positive
C2C2-Dof10	PebMYB198	0.958292	9.27e-07	positive
WRKY35	PebMYB13	0.958258	9.3e-07	positive
bHLH44	PebMYB113	0.958239	9.32e-07	positive
C2C2-Dof1	PebMYB214	0.95822	9.35e-07	positive
C2C2-Dof39	PebMYB19	0.958202	9.37e-07	positive
WRKY14	PebMYB60	0.958194	9.37e-07	positive
HB-BELL7	PebMYB172	0.958193	9.38e-07	positive
GRAS30	PebMYB6	0.958191	9.38e-07	positive
B335	PebMYB60	0.958166	9.41e-07	positive
SRS2	PebMYB3R3	0.958159	9.41e-07	positive
TCP21	PebMYB155	0.958128	9.45e-07	positive
C2C2-GATA27	PebMYB179	0.958126	9.45e-07	positive
PLATZ1	PebMYB16	0.958124	9.45e-07	positive
C2C2-Dof9	PebMYB54	0.958096	9.48e-07	positive
HD-ZIP52	PebMYB68	0.958085	9.5e-07	positive
bHLH31	PebMYB190	0.958077	9.5e-07	positive
C2H226	PebMYB15	0.958069	9.51e-07	positive
OFP7	PebMYB16	0.958062	9.52e-07	positive
GARP1	PebMYB83	0.958055	9.53e-07	positive
HSF12	PebMYB6	0.958041	9.54e-07	positive
C2C2-Dof18	PebMYB86	0.957976	9.62e-07	positive
WRKY14	PebMYB58	0.957926	9.67e-07	positive
GRAS35	PebMYB16	0.957911	9.69e-07	positive
C2C2-YABBY5	PebMYB78	0.957878	9.73e-07	positive
bHLH18	PebMYB80	0.957842	9.77e-07	positive
WRKY66	PebMYB94	0.957825	9.79e-07	positive
GARP1	PebMYB58	0.95782	9.79e-07	positive
GRAS55	PebMYB147	0.957802	9.82e-07	positive
NAC6	PebMYB66	0.95779	9.83e-07	positive
LOB22	PebMYB47	0.957786	9.83e-07	positive
TCP35	PebMYB13	0.95778	9.84e-07	positive
HD-ZIP16	PebMYB68	0.957777	9.84e-07	positive
NAC29	PebMYB192	0.957739	9.89e-07	positive
C2H286	PebMYB177	0.957717	9.91e-07	positive
C2C2-CO17	PebMYB172	0.957706	9.93e-07	positive
Trihelix38	PebMYB179	0.957699	9.93e-07	positive
NAC3	PebMYB43	0.957694	9.94e-07	positive
bHLH101	PebMYB53	0.957687	9.95e-07	positive
GRAS33	PebMYB58	0.95768	9.96e-07	positive
GARP10	PebMYB124	0.957673	9.96e-07	positive
bZIP32	PebMYB40	0.95767	9.97e-07	positive
GRAS34	PebMYB192	0.957659	9.98e-07	positive
B38	PebMYB19	0.957653	9.99e-07	positive
GRAS35	PebMYB58	0.957634	1e-06	positive
SBP26	PebMYB117	0.957612	1e-06	positive
TCP4	PebMYB165	0.957595	1.01e-06	positive
BES19	PebMYB51	0.957564	1.01e-06	positive
HD-ZIP51	PebMYB58	0.957552	1.01e-06	positive
AP2/ERF104	PebMYB106	0.957538	1.01e-06	positive
NF-YA7	PebMYB165	0.957494	1.02e-06	positive
GRAS50	PebMYB90	0.957487	1.02e-06	positive
LOB9	PebMYB6	0.957484	1.02e-06	positive
NAC18	PebMYB44	0.957461	1.02e-06	positive
HD-ZIP23	PebMYB164	0.957454	1.02e-06	positive
HB-other10	PebMYB46	0.957442	1.02e-06	positive
GRF16	PebMYB121	0.957439	1.02e-06	positive
bHLH111	PebMYB122	0.957438	1.02e-06	positive
C2H228	PebMYB15	0.957416	1.03e-06	positive
MADS-MIKC22	PebMYB113	0.957411	1.03e-06	positive
C2H296	PebMYB22	0.95741	1.03e-06	positive
HSF20	PebMYB90	0.957408	1.03e-06	positive
NAC47	PebMYB60	0.957402	1.03e-06	positive
AP2/ERF118	PebMYB60	0.9574	1.03e-06	positive
bZIP13	PebMYB90	0.957382	1.03e-06	positive
C2H29	PebMYB88	0.957368	1.03e-06	positive
NAC42	PebMYB192	0.957361	1.03e-06	positive
WRKY29	PebMYB125	0.957329	1.04e-06	positive
C2C2-GATA18	PebMYB190	0.957318	1.04e-06	positive
LOB23	PebMYB3R3	0.957288	1.04e-06	positive
C3H54	PebMYB21	0.957281	1.04e-06	positive
GRAS42	PebMYB216	0.95725	1.05e-06	positive
C2H268	PebMYB7	0.95724	1.05e-06	positive
WRKY17	PebMYB64	0.957226	1.05e-06	positive
bZIP63	PebMYB128	0.957198	1.05e-06	positive
NF-YB8	PebMYB40	0.95719	1.05e-06	positive
GRAS9	PebMYB215	-0.957164	1.06e-06	negative
bHLH107	PebMYB114	0.95716	1.06e-06	positive
GRAS24	PebMYB113	0.957155	1.06e-06	positive
HD-ZIP13	PebMYB174	0.95714	1.06e-06	positive
C2H238	PebMYB64	0.957112	1.06e-06	positive
TCP35	PebMYB192	0.957104	1.06e-06	positive
NAC4	PebMYB179	0.957098	1.06e-06	positive
HD-ZIP10	PebMYB121	0.957095	1.07e-06	positive
bZIP38	PebMYB4	0.957094	1.07e-06	positive
HD-ZIP10	PebMYB14	0.957086	1.07e-06	positive
bHLH50	PebMYB87	0.957083	1.07e-06	positive
bZIP35	PebMYB40	0.957076	1.07e-06	positive
WRKY14	PebMYB86	0.957046	1.07e-06	positive
GARP6	PebMYB47	0.957032	1.07e-06	positive
C3H19	PebMYB179	0.957024	1.07e-06	positive
HSF11	PebMYB43	0.957023	1.07e-06	positive
GRAS14	PebMYB113	0.957019	1.07e-06	positive
bZIP82	PebMYB15	0.957	1.08e-06	positive
NAC42	PebMYB13	0.956994	1.08e-06	positive
HSF20	PebMYB113	0.956993	1.08e-06	positive
GARP10	PebMYB16	0.956987	1.08e-06	positive
bHLH46	PebMYB117	0.956968	1.08e-06	positive
NAC8	PebMYB54	0.956959	1.08e-06	positive
C2C2-GATA7	PebMYB127	-0.956957	1.08e-06	negative
Tify9	PebMYB58	0.956942	1.08e-06	positive
HD-ZIP17	PebMYB38	0.956931	1.09e-06	positive
C2C2-GATA24	PebMYB131	0.956921	1.09e-06	positive
bZIP43	PebMYB83	0.956912	1.09e-06	positive
zf-HD17	PebMYB42	0.956899	1.09e-06	positive
TCP26	PebMYB157	0.95687	1.09e-06	positive
GRAS9	PebMYB113	0.956862	1.09e-06	positive
zf-HD8	PebMYB144	0.95686	1.09e-06	positive
C2H231	PebMYB53	0.956849	1.1e-06	positive
WRKY7	PebMYB188	0.956833	1.1e-06	positive
BES112	PebMYB86	0.956833	1.1e-06	positive
LOB9	PebMYB49	0.956799	1.1e-06	positive
bZIP24	PebMYB94	0.956775	1.11e-06	positive
NF-YC10	PebMYB158	0.956771	1.11e-06	positive
WRKY9	PebMYB6	0.956766	1.11e-06	positive
C3H67	PebMYB140	0.956757	1.11e-06	positive
C2C2-CO8	PebMYB121	0.956746	1.11e-06	positive
bZIP13	PebMYB13	0.956744	1.11e-06	positive
GRAS54	PebMYB36	0.956744	1.11e-06	positive
AP2/ERF118	PebMYB177	0.956723	1.11e-06	positive
B356	PebMYB43	0.956716	1.11e-06	positive
NAC47	PebMYB4	0.95668	1.12e-06	positive
bHLH17	PebMYB1	0.956676	1.12e-06	positive
NF-YA1	PebMYB165	0.956666	1.12e-06	positive
RWP-RK4	PebMYB80	0.956635	1.12e-06	positive
HSF9	PebMYB49	0.95662	1.12e-06	positive
NAC32	PebMYB80	0.956611	1.13e-06	positive
WRKY32	PebMYB64	0.956607	1.13e-06	positive
AP2/ERF38	PebMYB57	-0.956603	1.13e-06	negative
HB-BELL6	PebMYB155	-0.956595	1.13e-06	negative
bHLH17	PebMYB6	0.956584	1.13e-06	positive
bHLH23	PebMYB80	0.956565	1.13e-06	positive
bZIP42	PebMYB69	0.956563	1.13e-06	positive
GRF8	PebMYB54	0.956556	1.13e-06	positive
CSD2	PebMYB171	0.956542	1.13e-06	positive
HSF14	PebMYB215	-0.956486	1.14e-06	negative
PLATZ2	PebMYB153	-0.956475	1.14e-06	negative
bHLH44	PebMYB46	0.956475	1.14e-06	positive
AP2/ERF35	PebMYB43	0.956468	1.14e-06	positive
HB-KNOX11	PebMYB147	0.956448	1.15e-06	positive
OFP14	PebMYB165	-0.956441	1.15e-06	negative
AP2/ERF16	PebMYB60	0.956425	1.15e-06	positive
NF-YA3	PebMYB215	-0.956418	1.15e-06	negative
SBP12	PebMYB174	0.956417	1.15e-06	positive
GRAS5	PebMYB94	0.956411	1.15e-06	positive
WRKY62	PebMYB13	0.956409	1.15e-06	positive
bZIP81	PebMYB97	0.956387	1.15e-06	positive
TCP19	PebMYB30	0.95638	1.16e-06	positive
TCP24	PebMYB172	0.956362	1.16e-06	positive
WRKY5	PebMYB3R5	0.956343	1.16e-06	positive
C2H230	PebMYB155	0.956315	1.16e-06	positive
Tify10	PebMYB43	0.956315	1.16e-06	positive
GRAS35	PebMYB113	0.956315	1.16e-06	positive
WRKY85	PebMYB4	0.956269	1.17e-06	positive
AP2/ERF72	PebMYB60	0.956262	1.17e-06	positive
GRAS14	PebMYB47	0.956256	1.17e-06	positive
NF-YC7	PebMYB190	0.956254	1.17e-06	positive
C2H265	PebMYB94	0.956218	1.18e-06	positive
bZIP74	PebMYB124	0.956218	1.18e-06	positive
B364	PebMYB80	0.956196	1.18e-06	positive
GARP10	PebMYB64	0.956192	1.18e-06	positive
C2C2-YABBY3	PebMYB174	0.956175	1.18e-06	positive
WRKY85	PebMYB194	0.956171	1.18e-06	positive
C2H28	PebMYB215	-0.956154	1.19e-06	negative
AP2/ERF119	PebMYB43	0.956144	1.19e-06	positive
LOB15	PebMYB90	0.956134	1.19e-06	positive
AP2/ERF129	PebMYB6	0.956128	1.19e-06	positive
AP2/ERF113	PebMYB97	0.956122	1.19e-06	positive
Trihelix27	PebMYB140	0.956112	1.19e-06	positive
bHLH100	PebMYB173	-0.956105	1.19e-06	negative
NF-YA11	PebMYB117	0.956101	1.19e-06	positive
AP2/ERF79	PebMYB15	0.9561	1.19e-06	positive
BES112	PebMYB4	0.956077	1.2e-06	positive
C2H286	PebMYB215	-0.956065	1.2e-06	negative
WRKY16	PebMYB46	0.956057	1.2e-06	positive
C3H73	PebMYB91	0.956048	1.2e-06	positive
MADS-MIKC3	PebMYB88	0.956037	1.2e-06	positive
C3H75	PebMYB97	0.956016	1.2e-06	positive
AP2/ERF1	PebMYB117	0.956003	1.21e-06	positive
bZIP35	PebMYB16	0.956003	1.21e-06	positive
NAC6	PebMYB16	0.956	1.21e-06	positive
NAC20	PebMYB19	0.955993	1.21e-06	positive
C2C2-YABBY3	PebMYB143	0.955983	1.21e-06	positive
C3H9	PebMYB140	0.955977	1.21e-06	positive
C2H267	PebMYB14	0.955973	1.21e-06	positive
C2C2-CO18	PebMYB212	0.955961	1.21e-06	positive
GRAS33	PebMYB49	0.955938	1.21e-06	positive
SRS4	PebMYB38	0.955903	1.22e-06	positive
bHLH101	PebMYB86	0.955899	1.22e-06	positive
AP2/ERF38	PebMYB165	0.955876	1.22e-06	positive
C2H265	PebMYB117	0.955872	1.22e-06	positive
NF-YC8	PebMYB127	-0.955868	1.22e-06	negative
GARP42	PebMYB121	0.955856	1.23e-06	positive
C2C2-YABBY7	PebMYB54	0.955854	1.23e-06	positive
C2H211	PebMYB4	0.955847	1.23e-06	positive
C3H36	PebMYB69	0.955838	1.23e-06	positive
HB-WOX6	PebMYB66	0.955797	1.23e-06	positive
GARP21	PebMYB43	0.955782	1.24e-06	positive
AP2/ERF36	PebMYB154	0.955773	1.24e-06	positive
NAC16	PebMYB1	0.955766	1.24e-06	positive
WRKY26	PebMYB49	0.95576	1.24e-06	positive
bHLH44	PebMYB69	0.95576	1.24e-06	positive
bHLH25	PebMYB212	0.955757	1.24e-06	positive
C2H211	PebMYB60	0.955754	1.24e-06	positive
NAC26	PebMYB80	0.955751	1.24e-06	positive
bHLH46	PebMYB86	0.955745	1.24e-06	positive
C3H31	PebMYB191	0.955737	1.24e-06	positive
AP2/ERF31	PebMYB146	0.955735	1.24e-06	positive
NAC23	PebMYB21	0.955732	1.24e-06	positive
GRAS30	PebMYB51	0.955724	1.24e-06	positive
CSD1	PebMYB94	0.955692	1.25e-06	positive
WRKY14	PebMYB91	0.95569	1.25e-06	positive
C2H226	PebMYB34	0.955676	1.25e-06	positive
WRKY16	PebMYB90	0.955652	1.25e-06	positive
HSF20	PebMYB4	0.955648	1.25e-06	positive
C2H232	PebMYB78	0.955648	1.25e-06	positive
GRAS40	PebMYB20	0.955635	1.26e-06	positive
C2H267	PebMYB111	0.955618	1.26e-06	positive
C2C2-YABBY5	PebMYB111	0.955608	1.26e-06	positive
C3H73	PebMYB64	0.955601	1.26e-06	positive
C2H291	PebMYB77	-0.955594	1.26e-06	negative
C2H285	PebMYB188	0.955572	1.27e-06	positive
HSF17	PebMYB6	0.955542	1.27e-06	positive
LOB22	PebMYB4	0.955514	1.27e-06	positive
AP2/ERF52	PebMYB18	0.955482	1.28e-06	positive
DDT6	PebMYB3R5	0.955434	1.28e-06	positive
GARP19	PebMYB90	0.95542	1.29e-06	positive
C2C2-Dof43	PebMYB38	0.955416	1.29e-06	positive
NAC3	PebMYB40	0.95541	1.29e-06	positive
C2H224	PebMYB46	0.955395	1.29e-06	positive
WRKY61	PebMYB177	0.955393	1.29e-06	positive
OFP6	PebMYB16	0.955381	1.29e-06	positive
AP2/ERF27	PebMYB9	0.955371	1.29e-06	positive
OFP7	PebMYB60	0.955369	1.29e-06	positive
OFP7	PebMYB83	0.955366	1.29e-06	positive
Tify1	PebMYB142	0.955351	1.3e-06	positive
TCP5	PebMYB24	0.95534	1.3e-06	positive
WRKY85	PebMYB3R5	0.955337	1.3e-06	positive
GRAS24	PebMYB19	0.955323	1.3e-06	positive
HSF26	PebMYB58	0.955309	1.3e-06	positive
TCP28	PebMYB212	0.955309	1.3e-06	positive
C2C2-GATA22	PebMYB47	0.955302	1.3e-06	positive
GRAS4	PebMYB192	0.955292	1.3e-06	positive
C2C2-Dof14	PebMYB58	0.955288	1.31e-06	positive
zf-HD13	PebMYB177	-0.955238	1.31e-06	negative
NF-YC5	PebMYB3R5	0.955234	1.31e-06	positive
NAC45	PebMYB3R2	-0.95523	1.31e-06	negative
GARP52	PebMYB69	0.955207	1.32e-06	positive
NAC9	PebMYB30	0.955179	1.32e-06	positive
C2H233	PebMYB4	0.955168	1.32e-06	positive
C2C2-YABBY7	PebMYB32	0.955156	1.32e-06	positive
GARP67	PebMYB144	0.95515	1.33e-06	positive
GRAS10	PebMYB49	0.955146	1.33e-06	positive
C2H268	PebMYB173	0.955145	1.33e-06	positive
C2C2-GATA16	PebMYB14	0.955134	1.33e-06	positive
bZIP13	PebMYB4	0.955129	1.33e-06	positive
NAC17	PebMYB69	0.955098	1.33e-06	positive
SBP11	PebMYB54	0.955069	1.34e-06	positive
HB-other14	PebMYB40	0.955057	1.34e-06	positive
Alfin2	PebMYB216	0.955043	1.34e-06	positive
LOB2	PebMYB3R3	0.955001	1.35e-06	positive
C2C2-GATA7	PebMYB96	-0.954985	1.35e-06	negative
NF-YB6	PebMYB185	-0.95498	1.35e-06	negative
WRKY10	PebMYB13	0.954979	1.35e-06	positive
AP2/ERF8	PebMYB174	0.954955	1.35e-06	positive
HB-KNOX5	PebMYB215	-0.954949	1.35e-06	negative
C2H222	PebMYB43	0.954945	1.36e-06	positive
AP2/ERF35	PebMYB19	0.954945	1.36e-06	positive
B364	PebMYB106	0.954932	1.36e-06	positive
GRAS48	PebMYB4	0.954917	1.36e-06	positive
GRAS29	PebMYB113	0.954895	1.36e-06	positive
NAC8	PebMYB172	0.954887	1.36e-06	positive
HB-BELL6	PebMYB179	0.954878	1.37e-06	positive
B335	PebMYB64	0.954868	1.37e-06	positive
SBP2	PebMYB212	-0.954864	1.37e-06	negative
C2H231	PebMYB94	0.954841	1.37e-06	positive
C2H255	PebMYB54	0.95482	1.37e-06	positive
Trihelix29	PebMYB91	0.954813	1.38e-06	positive
AP2/ERF57	PebMYB90	0.954811	1.38e-06	positive
OFP5	PebMYB78	0.954771	1.38e-06	positive
C3H36	PebMYB86	0.954765	1.38e-06	positive
Trihelix17	PebMYB198	0.954762	1.38e-06	positive
C2H28	PebMYB90	0.954761	1.38e-06	positive
NAC47	PebMYB86	0.954745	1.39e-06	positive
NF-YA1	PebMYB212	-0.95473	1.39e-06	negative
C2H238	PebMYB60	0.954729	1.39e-06	positive
NAC39	PebMYB179	0.954716	1.39e-06	positive
Tify17	PebMYB4	0.954705	1.39e-06	positive
GARP5	PebMYB3R5	0.954689	1.39e-06	positive
NAC34	PebMYB47	0.954677	1.4e-06	positive
MADS-MIKC4	PebMYB90	0.954673	1.4e-06	positive
WRKY5	PebMYB194	0.954663	1.4e-06	positive
AP2/ERF28	PebMYB9	0.954651	1.4e-06	positive
NAC18	PebMYB72	0.954644	1.4e-06	positive
GARP51	PebMYB13	0.954639	1.4e-06	positive
bHLH44	PebMYB19	0.954637	1.4e-06	positive
C3H20	PebMYB216	0.954633	1.4e-06	positive
TCP35	PebMYB16	0.954591	1.41e-06	positive
Trihelix35	PebMYB158	-0.95455	1.41e-06	negative
OFP7	PebMYB64	0.954499	1.42e-06	positive
HSF14	PebMYB144	0.954471	1.43e-06	positive
WRKY27	PebMYB20	0.954468	1.43e-06	positive
C3H6	PebMYB2	-0.954463	1.43e-06	negative
bHLH9	PebMYB57	-0.954462	1.43e-06	negative
AP2/ERF19	PebMYB9	0.954452	1.43e-06	positive
TCP35	PebMYB222	0.954452	1.43e-06	positive
C2H279	PebMYB6	0.954426	1.43e-06	positive
HSF25	PebMYB215	-0.954419	1.44e-06	negative
LOB22	PebMYB15	0.954401	1.44e-06	positive
TCP32	PebMYB111	0.9544	1.44e-06	positive
TCP28	PebMYB172	0.954373	1.44e-06	positive
NAC6	PebMYB77	0.954373	1.44e-06	positive
NAC21	PebMYB1	0.954361	1.44e-06	positive
WRKY69	PebMYB13	0.954354	1.45e-06	positive
AP2/ERF115	PebMYB88	0.954318	1.45e-06	positive
AP2/ERF72	PebMYB15	0.9543	1.45e-06	positive
bHLH61	PebMYB87	0.954294	1.45e-06	positive
B363	PebMYB113	0.954294	1.45e-06	positive
GRAS5	PebMYB13	0.954283	1.46e-06	positive
LOB15	PebMYB117	0.954275	1.46e-06	positive
AP2/ERF66	PebMYB16	0.954271	1.46e-06	positive
GARP69	PebMYB10	0.954263	1.46e-06	positive
C2H265	PebMYB19	0.954258	1.46e-06	positive
HSF12	PebMYB49	0.954234	1.46e-06	positive
WRKY33	PebMYB94	0.954224	1.47e-06	positive
bHLH50	PebMYB32	0.954195	1.47e-06	positive
C2C2-CO17	PebMYB71	-0.95416	1.48e-06	negative
bHLH92	PebMYB179	0.95415	1.48e-06	positive
Trihelix16	PebMYB3R1	0.954148	1.48e-06	positive
NAC46	PebMYB194	0.954147	1.48e-06	positive
NAC38	PebMYB215	-0.954127	1.48e-06	negative
bHLH39	PebMYB94	0.954117	1.48e-06	positive
bHLH79	PebMYB192	0.954105	1.48e-06	positive
NF-YC9	PebMYB159	-0.954065	1.49e-06	negative
GRAS50	PebMYB215	-0.954053	1.49e-06	negative
GRAS14	PebMYB69	0.954036	1.5e-06	positive
zf-HD13	PebMYB16	-0.954032	1.5e-06	negative
HB-KNOX5	PebMYB30	0.954021	1.5e-06	positive
NAC41	PebMYB47	0.954006	1.5e-06	positive
GARP6	PebMYB88	0.954005	1.5e-06	positive
GRAS14	PebMYB215	-0.954001	1.5e-06	negative
DDT4	PebMYB179	0.95397	1.51e-06	positive
C2H267	PebMYB121	0.953964	1.51e-06	positive
TCP33	PebMYB179	0.953944	1.51e-06	positive
bHLH63	PebMYB165	-0.953943	1.51e-06	negative
Tify17	PebMYB144	0.953943	1.51e-06	positive
B368	PebMYB155	-0.95393	1.51e-06	negative
NAC38	PebMYB91	0.953926	1.51e-06	positive
SBP24	PebMYB113	0.953925	1.51e-06	positive
HD-ZIP39	PebMYB24	0.953906	1.52e-06	positive
C2H255	PebMYB157	0.953903	1.52e-06	positive
[truncated: 361 more rows]
